# Supplementary material for: A Hybrid Docking and Machine Learning Approach to Enhance the Performance of Virtual Screening Carried out on Protein–Protein Interfaces
Source: MDPI journal article supplement (doi:10.3390/ijms232214364), 2022-11-18
Supplement: s1 [file s1]

## Supporting Information

### **A hybrid docking and machine learning approach to enhance the performance of virtual screening carried out on protein-protein interfaces**

Natesh Singh, Bruno O. Villoutreix<sup>\*</sup>

*Université de Paris, Inserm UMR 1141 NeuroDiderot, Robert-Debré Hospital, 75019 Paris, France.*

\*To whom correspondence should be addressed: [bruno.villoutreix@inserm.fr](mailto:bruno.villoutreix@inserm.fr)

## Table of Contents

### SUPPORTING FIGURES

|                |     |
|----------------|-----|
| Figure S1..... | 3-4 |
| Figure S2..... | 5-6 |
| Figure S3..... | 7   |
| Figure S4..... | 8   |
| Figure S5..... | 9   |
| Figure S6..... | 10  |
| Figure S7..... | 11  |
| Figure S8..... | 12  |
| Figure S9..... | 13  |

### SUPPORTING TABLES

|                |       |
|----------------|-------|
| Table S1.....  | 14    |
| Table S2.....  | 15-18 |
| Table S3.....  | 19-21 |
| Table S4.....  | 22-24 |
| Table S5.....  | 25-27 |
| Table S6.....  | 28-30 |
| Table S7.....  | 31-36 |
| Table S8.....  | 37-39 |
| Table S9.....  | 39-43 |
| Table S10..... | 43-44 |

**a**

|          |                                                                                                           |          |                                                                                                          |          |                                                                                          |
|----------|-----------------------------------------------------------------------------------------------------------|----------|----------------------------------------------------------------------------------------------------------|----------|------------------------------------------------------------------------------------------|
| <b>1</b> | <b>Selection of PPI sites and protein-ligand complexes</b>                                                | <b>2</b> | <b>Datasets curation<br/>PAINS filter<br/>ligand preparation</b>                                         | <b>3</b> | <b>Docking with<br/>Surflex, rescoring<br/>with GOLD fns.</b>                            |
|          | 10 PPIs, 2 structures per target (BAZ2B, Bcl-2, Bcl-xL, BRD4-1, CREBBP, HIV IN, XIAP, Mcl-1, Mdm2, Menin) |          | ChEMBL, PubChem<br>$K_i$ , $K_d$ , $IC_{50}$ , $EC_{50}$ , % Inhibition<br>Activity cut-off < 10 $\mu$ M |          | 10 x 2 dockings, N = 3 poses/cpd, retain best-pose<br>VS performance estimation          |
| <b>4</b> | <b>Calculation of<br/>SASA descriptors<br/>(bound/unbound)</b>                                            | <b>5</b> | <b>VS performance<br/>estimation of<br/>SASA descriptors</b>                                             | <b>6</b> | <b>Construction of<br/>ML models using<br/>SASA descriptors</b>                          |
|          | 32 Protein SASA descriptors<br>32 Ligand SASA descriptors<br>16 Prot-Lig SASA descriptors                 |          | Area under the curve (AUC),<br>BEDROC, Enrichment<br>factors (EF1/5%)                                    |          | Estimation of Sensitivity,<br>Specificity, Precision,<br>Accuracy, AUC, J, MCC, k, $F_1$ |

**b**

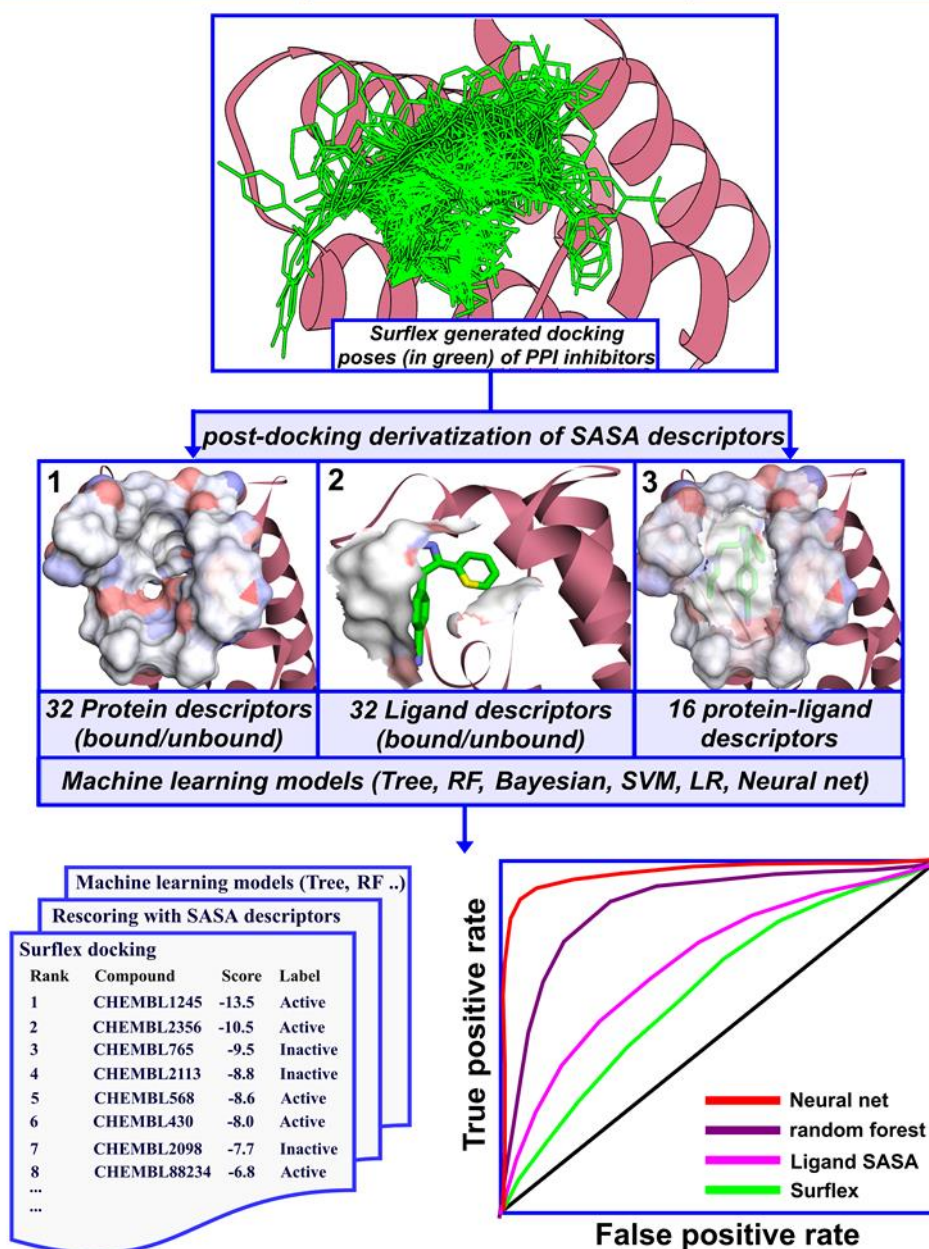

**Figure S1. (a)** Workflow diagram describing a hybrid computational approach developed in this study that combines structure-based virtual screening, rescoring, and machine learning algorithms: (1) selection of the PPI targets and their protein-ligand structures from the PDB; (2) collecting compounds from ChEMBL and PubChem followed by their categorization into actives or inactives, and then curation and ligand preparation; (3) flexible molecular docking (from the ligand side as two protein structures were used) with the fast ligand docking-scoring protocol of Surflex “pscreen” with several docking poses (e.g.,  $N = 3$ ) generated for each compound. These steps were followed by rescoring of all poses with GOLD scoring functions (GoldScore, ChemScore, ASP, ChemPLP, ChemScore RDS) and through consensus scoring utilizing all scoring functions; (4) post-docking derivatization of SASA descriptors of the protein and the ligand in the bound and unbound states for the top-ranked pose of the compounds obtained from Surflex docking. A set of protein-ligand SASA descriptors were calculated by combining protein and ligand SASA values; (5) VS performance estimation of SASA descriptors; (6) construction of machine learning models (Single tree, Bagged forest, Random forest, Bayesian, SVM, Logistic regression, Neural network, and Neural network with bagging) using SASA descriptors.

**(b)** Schematic representation of the post-processing technique applied to the docking poses and building of the machine learning models. Eighty SASA descriptors were calculated from the top-ranked docking pose of the compounds: (1) 32 protein descriptors; (2) 32 ligand descriptors; and (3) 16 protein-ligand descriptors. These descriptors were used to construct diverse machine learning models. The VS performance of the rescoring methods was assessed by estimating the ROC-based measures such as AUC, log EF1%, EF5%, and BEDROC ( $\alpha = 20$ ). The performance of the machine learning models was estimated by calculating ROC AUC, sensitivity, specificity, precision, concordance (overall accuracy), J, MCC,  $F_1$ , and k.

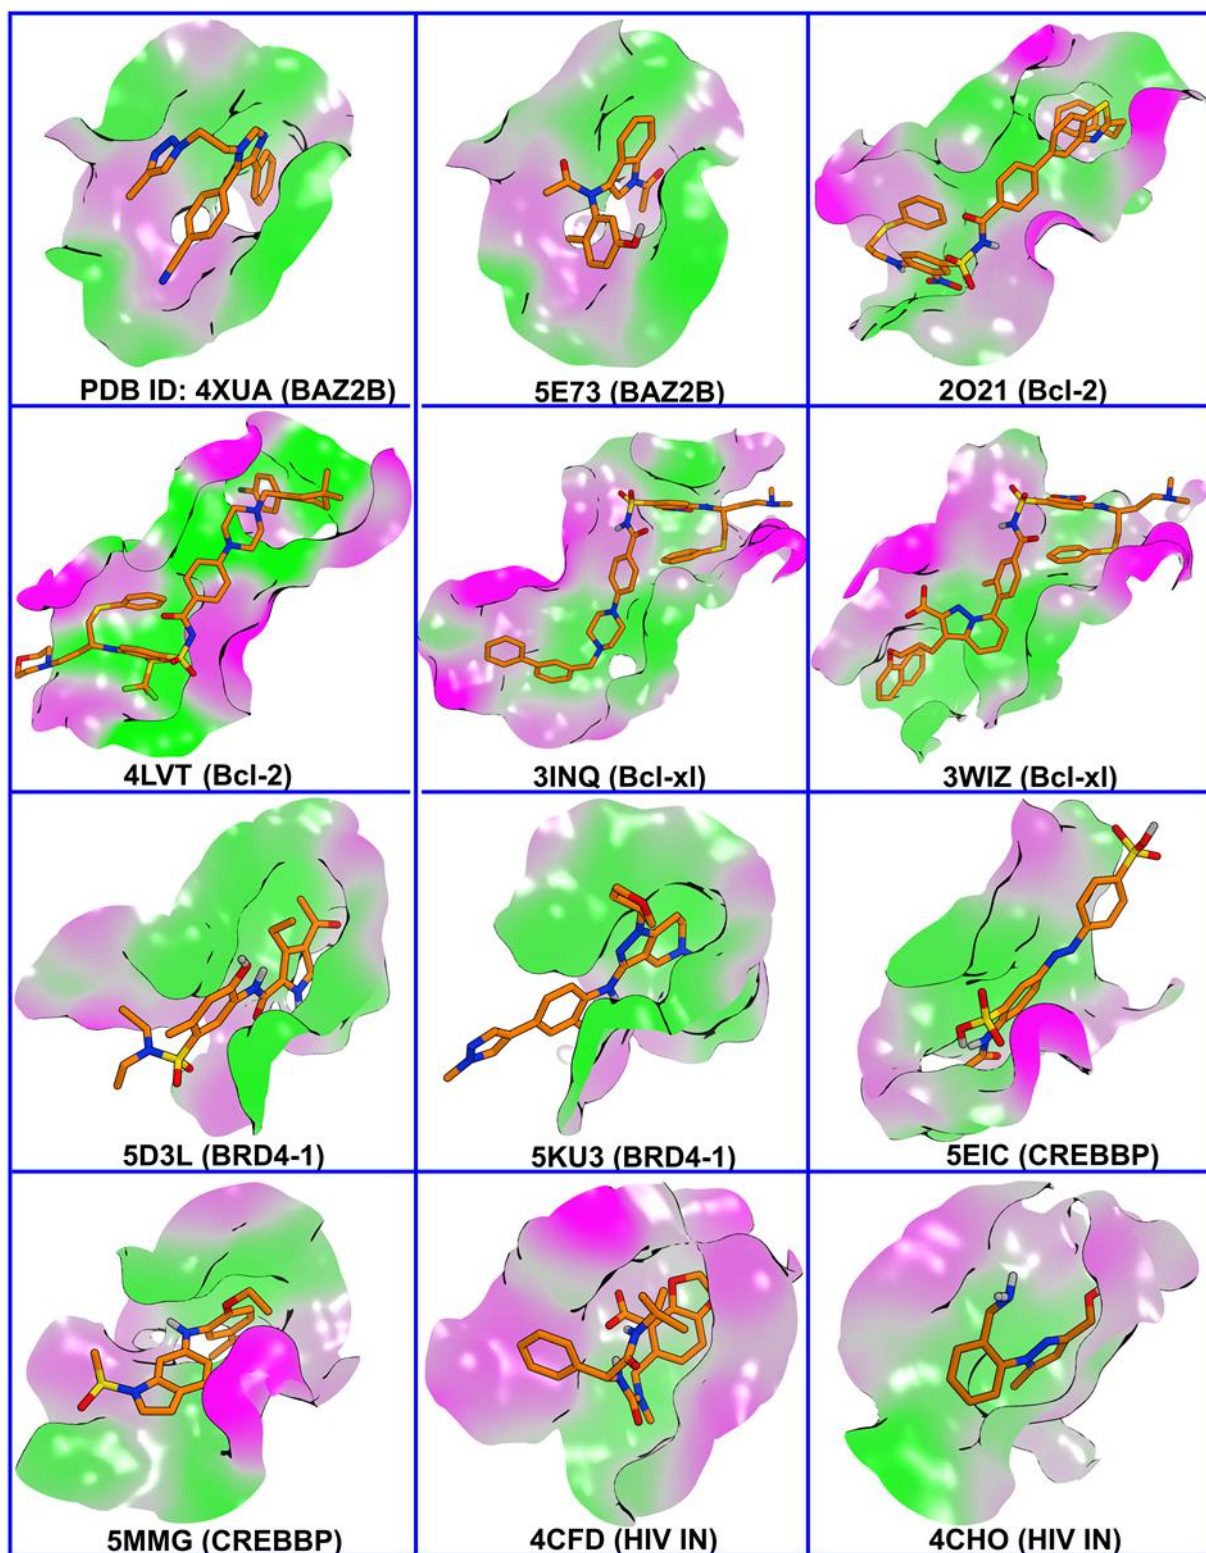



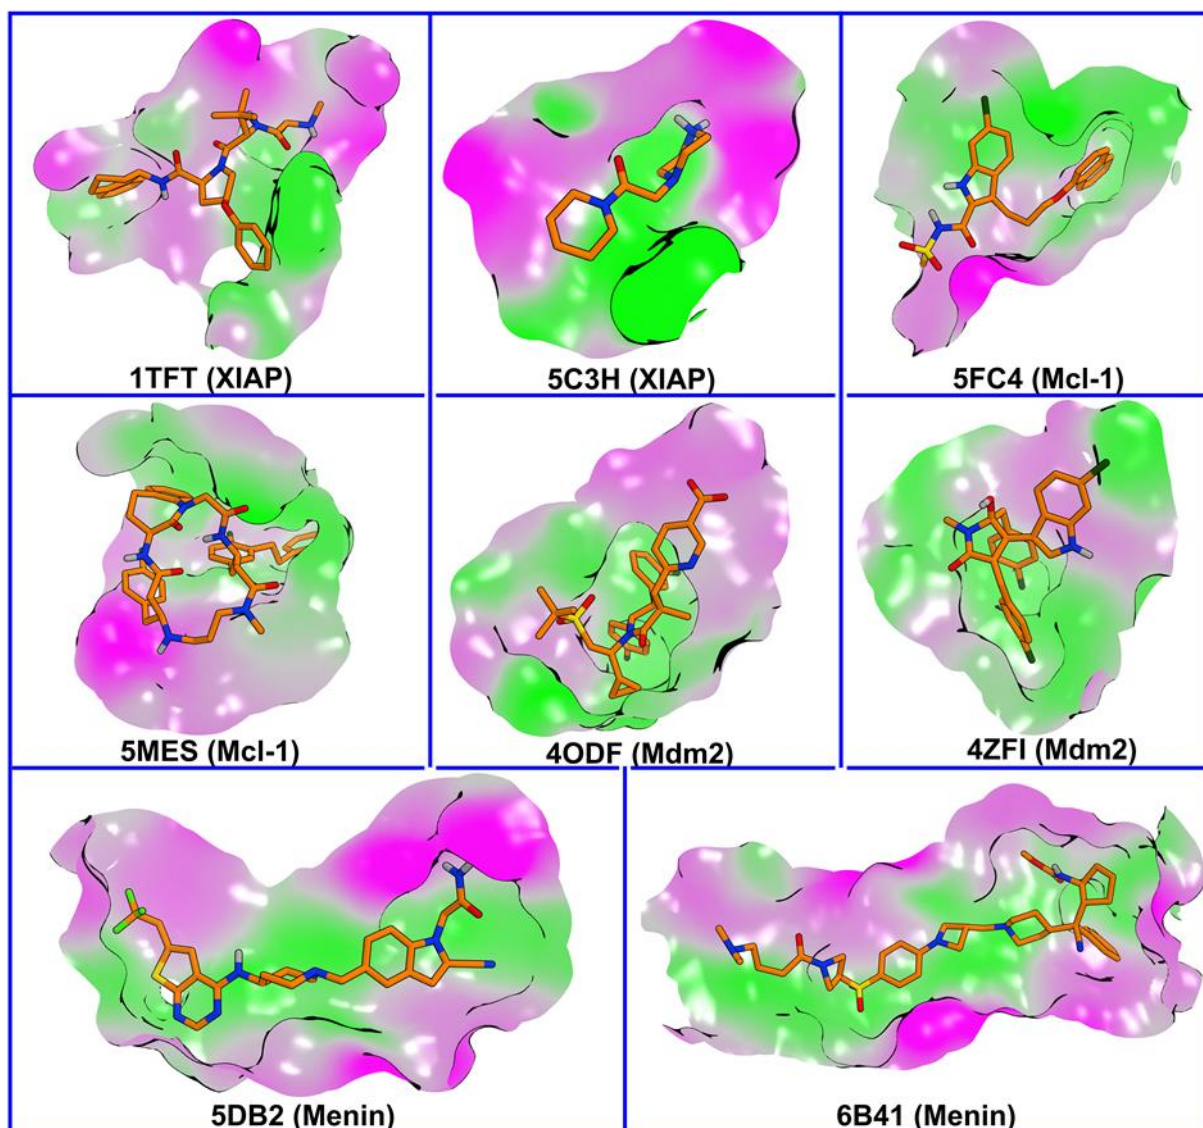

**Figure S2.** The ligand-binding cavities for the cluster protein representatives of the investigated PPI targets: BAZ2B (PDB ID: 4XUA, 5E73), Bcl-2 (2O21, 4LVT), Bcl-xL (3INQ, 3WIZ), BRD4-1 (5D3L, 5KU3), CREBBP (5EIC, 5MMG), HIV IN (4CFD, 4CHO), XIAP (1TFT, 5C3H), Mcl-1 (5FC4, 5MES), Mdm2 (4ODF, 4ZFI), and Menin (5DB2, 6B41). The binding site surface is colored according to the type of residue surrounding the ligand (magenta: hydrophilic residues, green: hydrophobic residues, and grey: neutral areas). The inhibitor bound to the target proteins is shown in stick (orange) representation. The figure was generated using MOE.

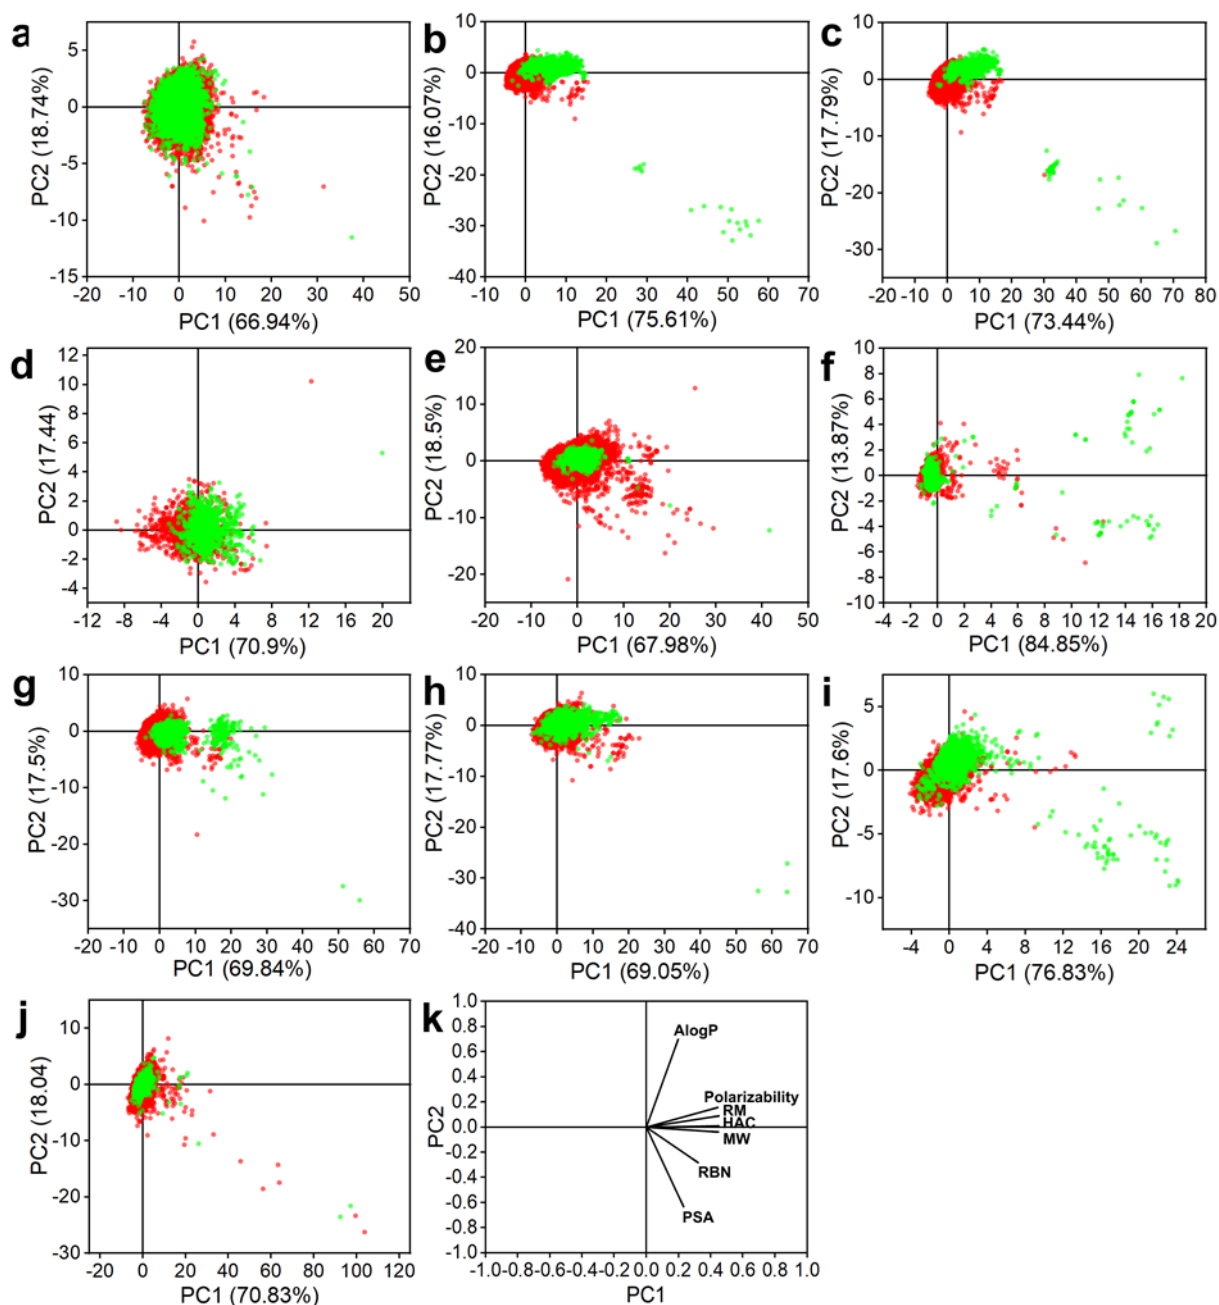

**Figure S3.** PCA score plots of the PPI datasets. Compounds included in the score plots are (a) BAZ2B, (b) Bcl-2, (c) Bcl-xL, (d) BRD4-1, (e) CREBBP, (f) HIV IN, (g) XIAP, (h) Mcl-1, (i) Mdm2, and (j) Menin. Figure (k) shows the loading plot of descriptors used for PCA analysis. The compounds were described by seven simple descriptors: Number of heavy atoms (HAC), Molecular weight (MW), Number of rotatable bonds (RBN), AlogP, Polar surface area (PSA), Molar refractivity (RM), and Polarizability. Active and inactive compounds are shown in green and red circles, respectively. The first principal component describes in part the size (HAC and MW), and the second gives insights about polarity (PSA) and lipophilicity (AlogP).

**Figure S4.** Comparison of AUC values (y-axis) attained for ten PPI targets (twenty protein structures) using Surflex and different docking-pose derived SASA descriptors (x-axis). Each boxplot shows twenty AUC values for a given scoring method. A marked increase in mean and scoring performance (measured as AUC) can be seen for several SASA scoring metrics compared to Surflex.

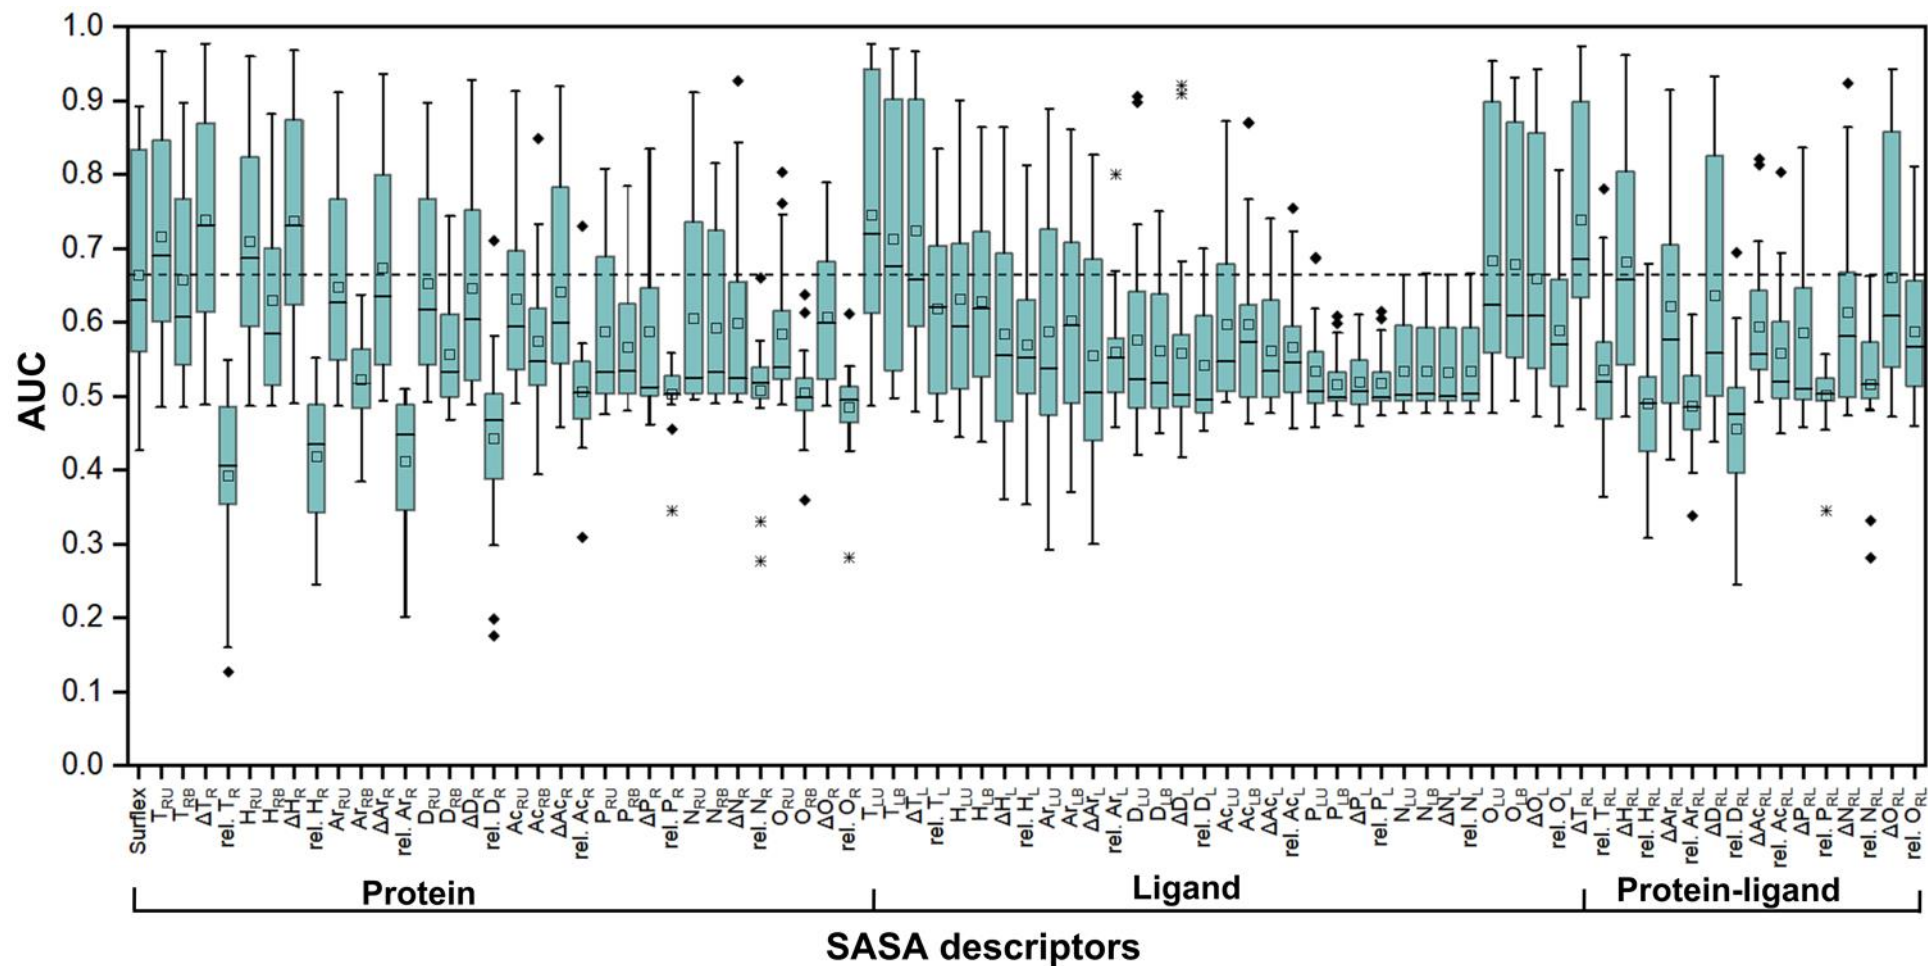



**Figure S5.** Comparison of EF 1% (a) and EF 5% (b) (y-axis) results attained for ten PPI targets (twenty protein structures) using Surflex and different SASA scoring methods (x-axis). Each boxplot shows twenty EF values for a given scoring method. A marked increase in mean and scoring performance (measured as EF1% and EF5%) can be seen in scoring methods SASA receptor total unbound ( $T_{RU}$ ), SASA receptor total delta ( $\Delta T_R$ ), SASA receptor hydrophobic delta ( $\Delta H_R$ ), SASA ligand total unbound ( $T_{LU}$ ), SASA ligand total bound ( $T_{LB}$ ), SASA ligand total delta ( $\Delta T_L$ ), SASA ligand other unbound ( $O_{LU}$ ), SASA receptor-ligand total delta ( $\Delta T_{RL}$ ) as compared to the Surflex scoring function.

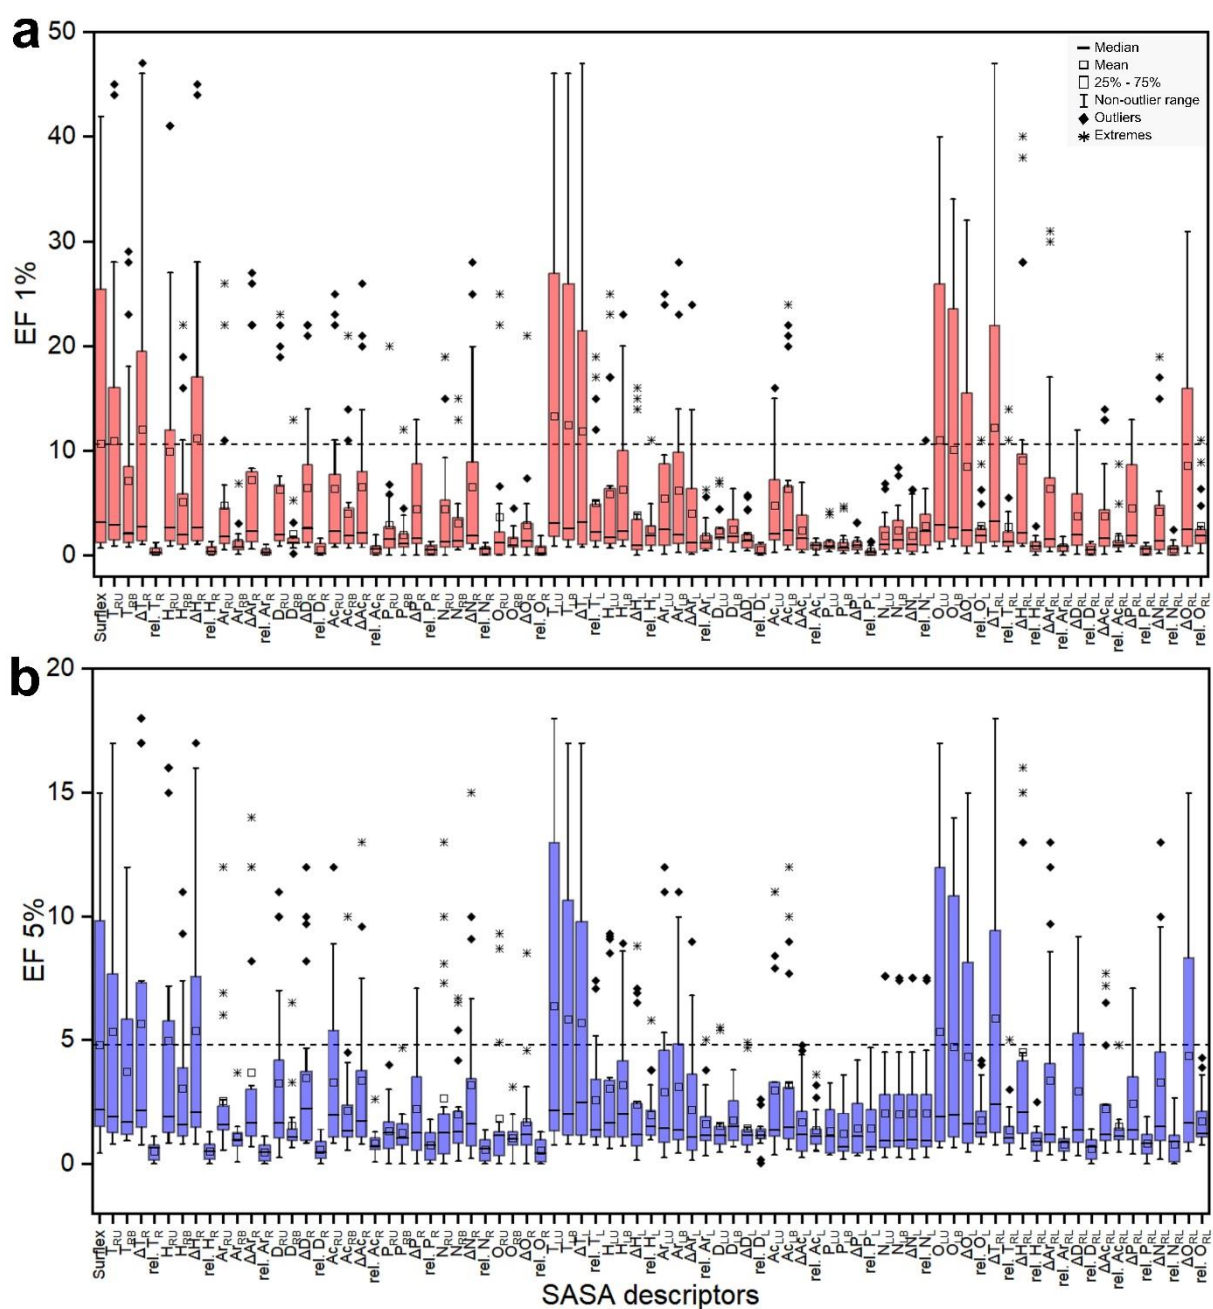

**Figure S6.** Heat map plot showing the BEDROC values for the ten PPI targets and their protein structures (y-axis) obtained using 32 protein SASA descriptors, 32 ligand SASA descriptors, and 16 protein-ligand SASA descriptors. The calculations were performed for each target-specific set of actives and inactives.

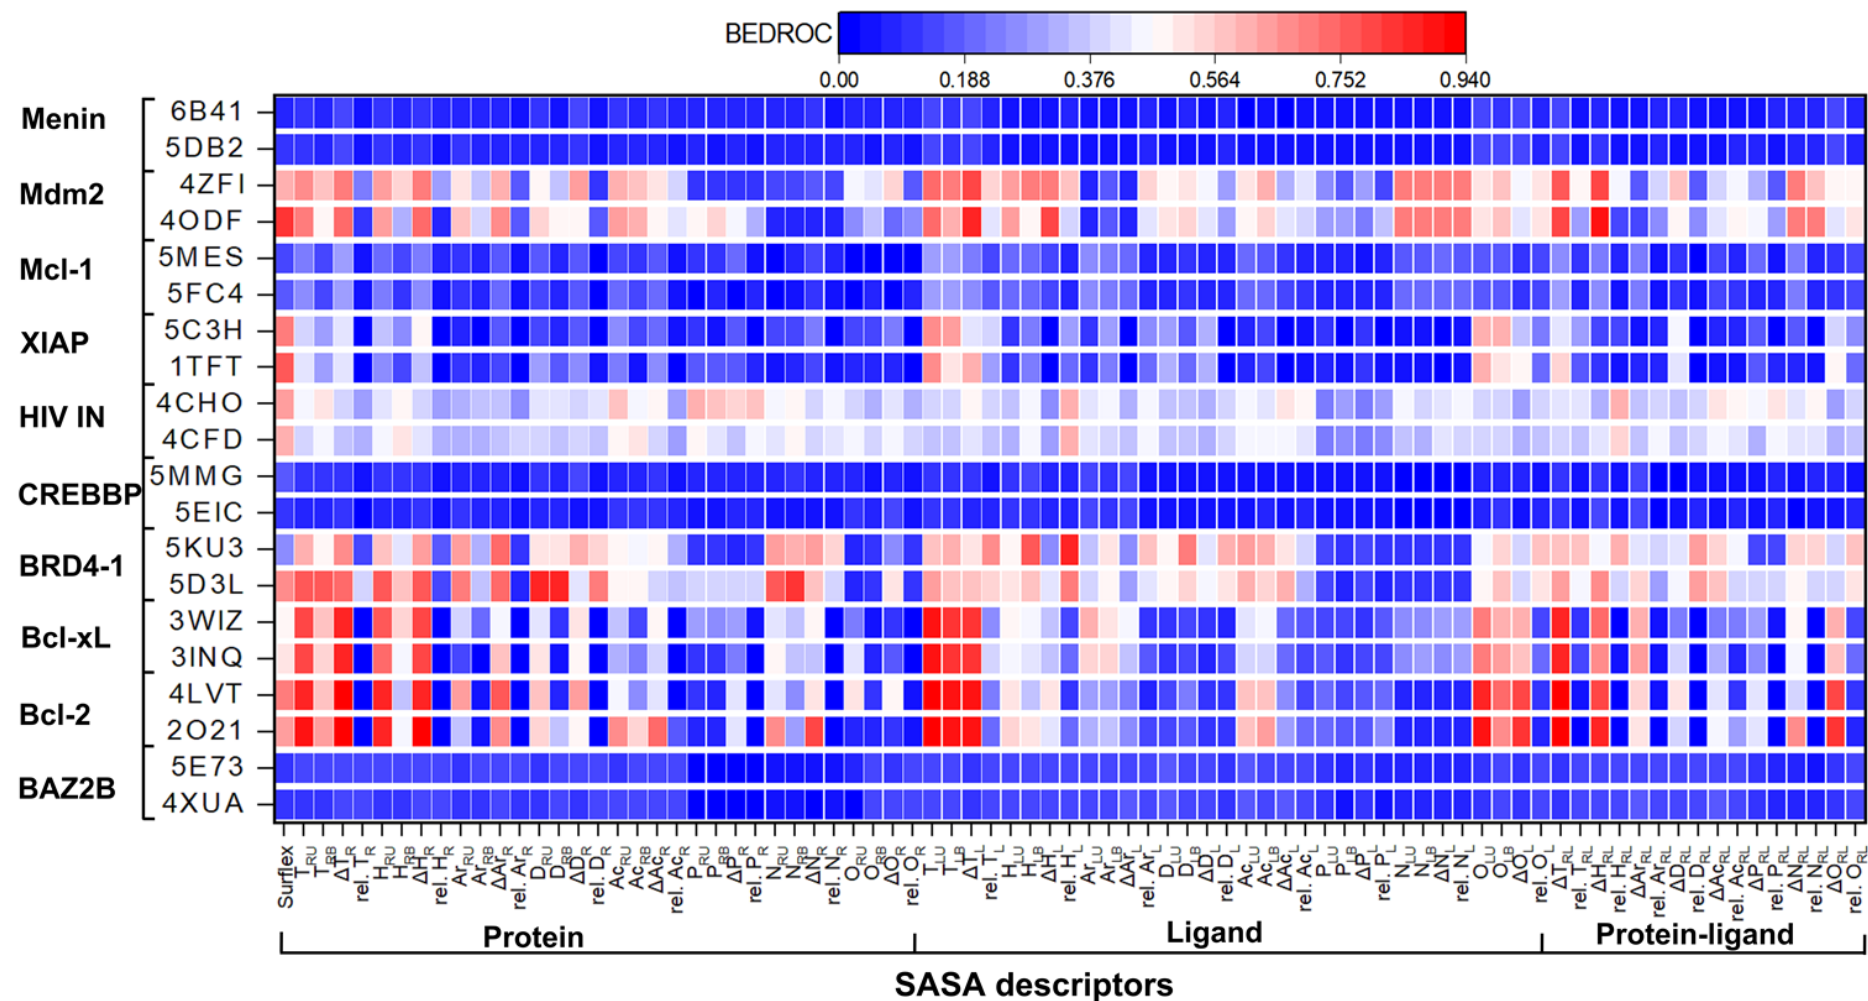

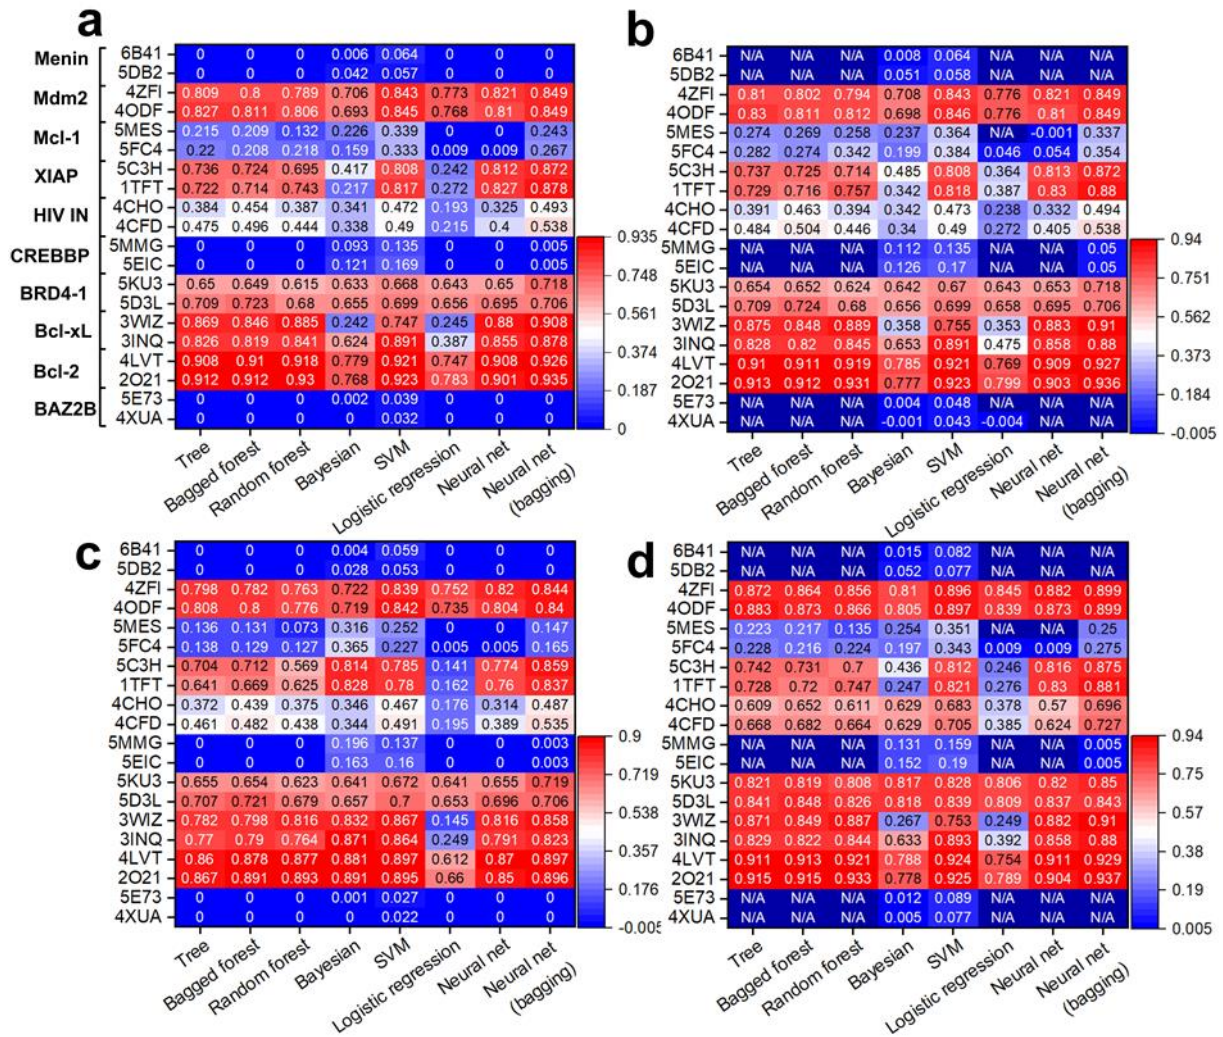

**Figure S7.** The heat maps show the additional external statistics for the machine learning models: (a)  $\kappa$  (b) MCC (c) J (d) F1.

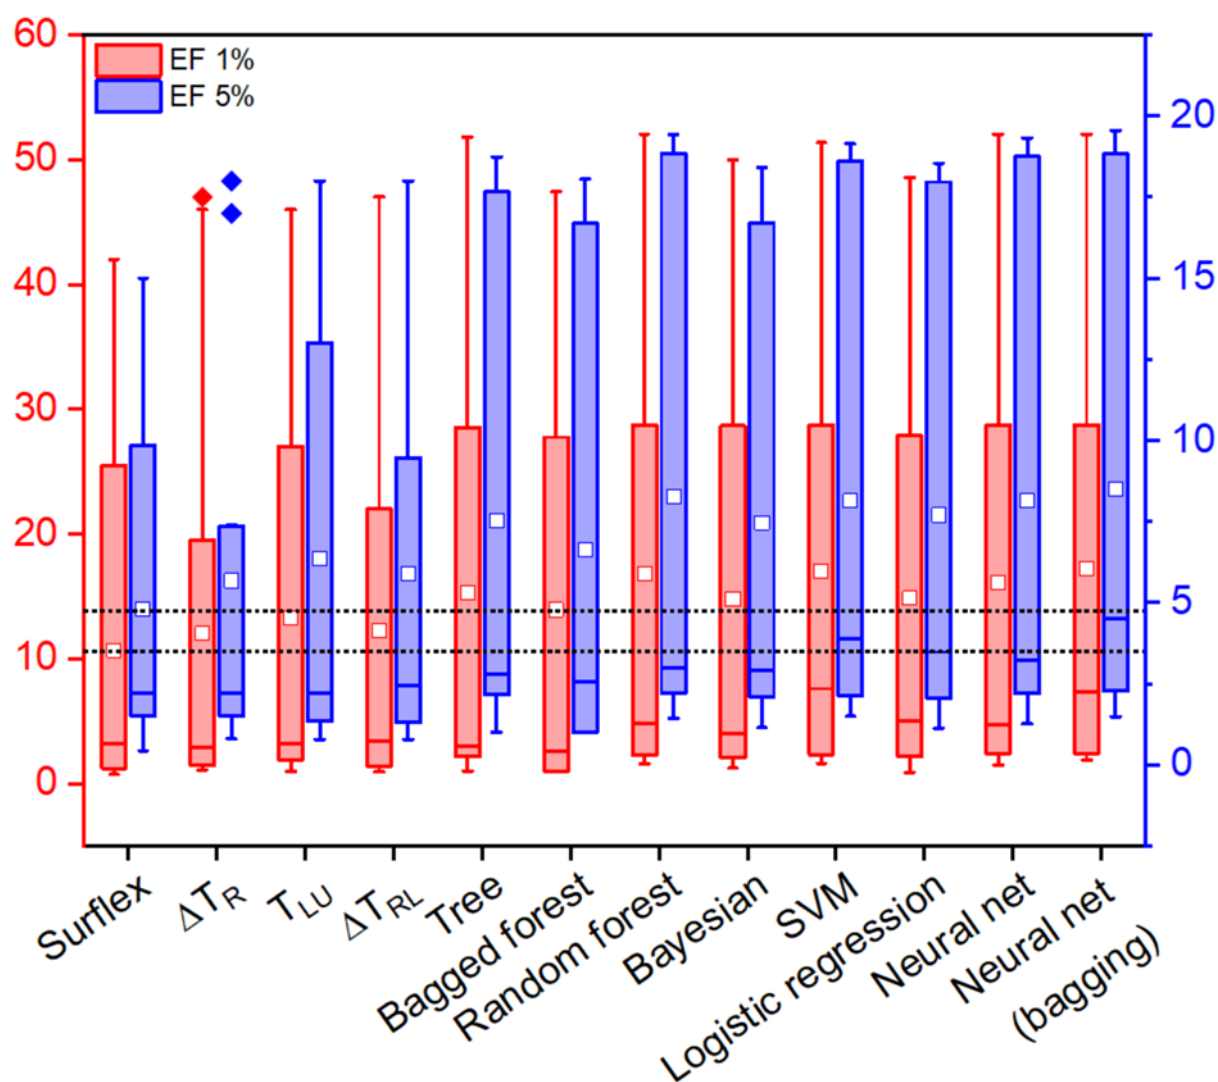

**Figure S8.** Comparison of EF1% and EF5% (y-axis) results attained for ten PPI targets (twenty protein structures) using Surflex; the best performing receptor SASA descriptor  $\Delta T_R$ ; the best performing ligand SASA descriptor  $T_{LU}$ ; the best performing receptor-ligand SASA descriptor  $\Delta T_{RL}$ ; and different machine learning methods (x-axis): Each boxplot shows twenty EF values for a given method. The horizontal black dotted lines in the plot indicate a marked increase in mean and scoring performance (measured as EF 1% and EF 5%) of the 3D descriptors and ML models compared to Surflex. Among the different ML methods, neural net (bagging) produced the best results on this PPI dataset.



**Figure S9.** Relative molecular descriptor importance inferred from the Neural network (bagging) models. Each box plot underlines the relative importance of the descriptors inferred from the 20 Neural networks (bagging) classifier models trained to discriminate between active and inactive PPI molecules. The importance of the descriptors is sorted from highest (SASA receptor hydrophobic delta) to lowest (relative SASA receptor other). The x-axis reports the SASA descriptors, and the y-axis the relative importance of the descriptors.

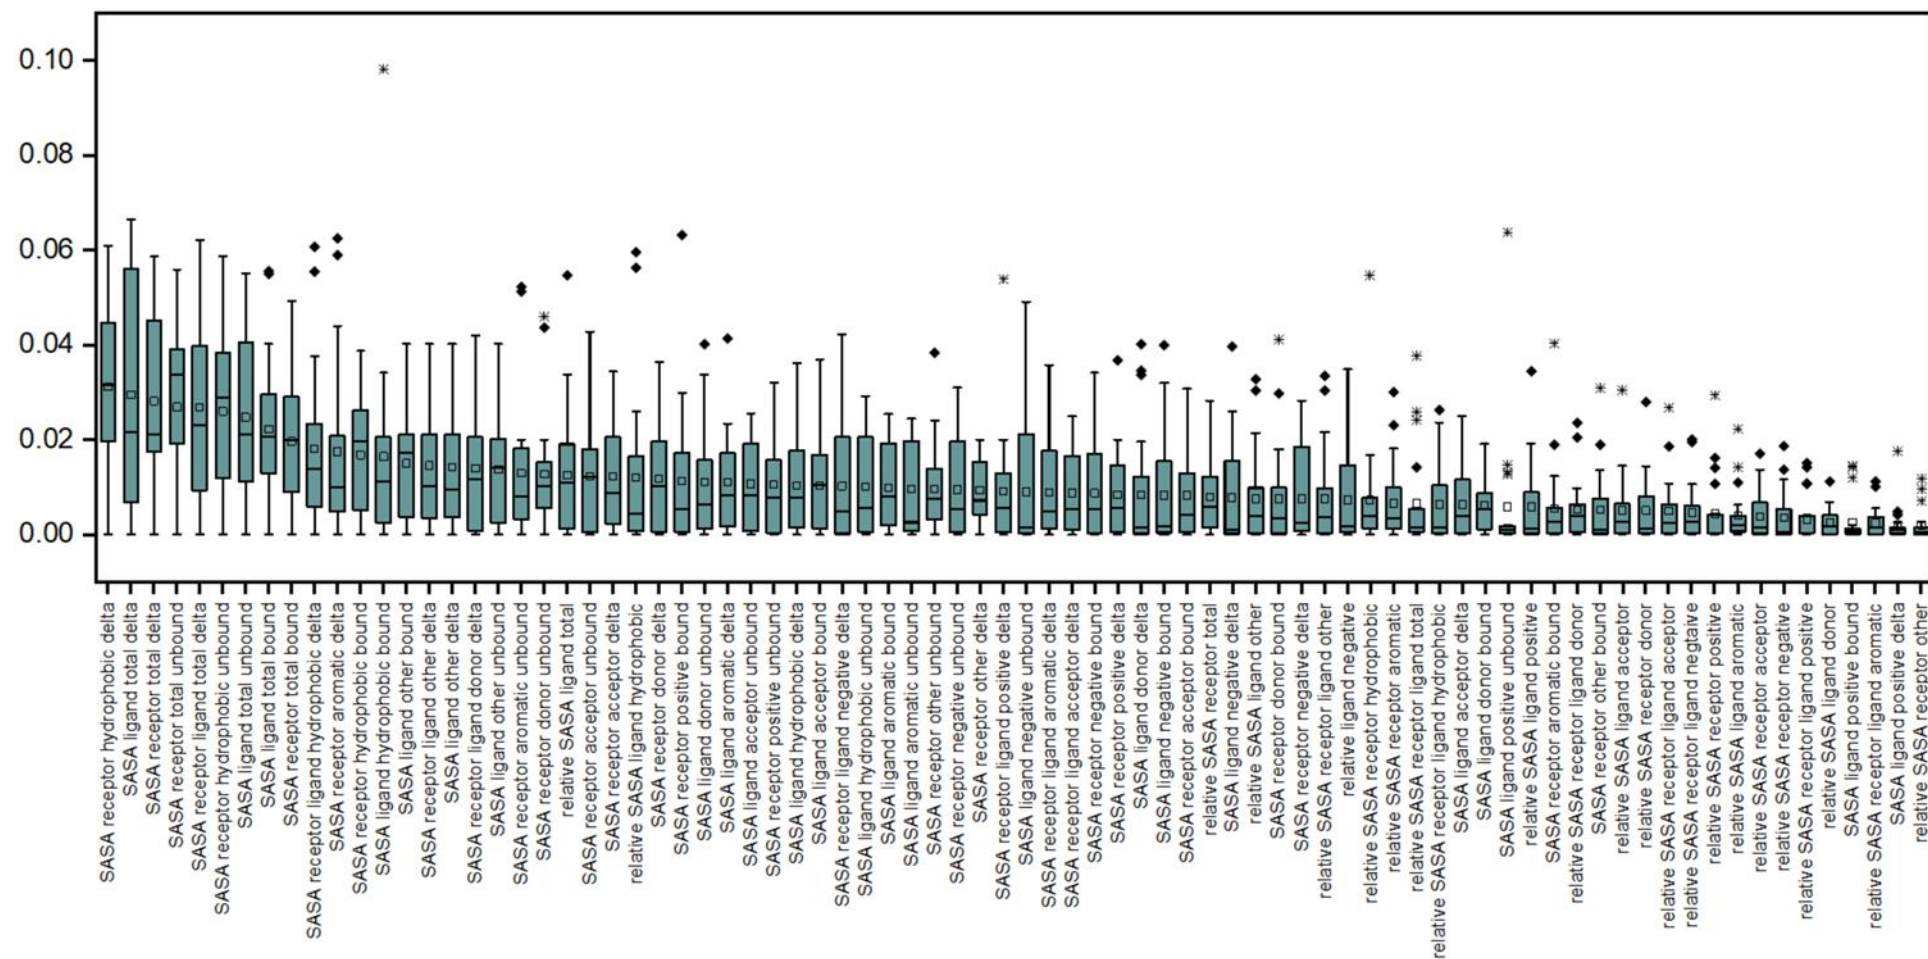

**Table S1.** The Enrichment Factors (EF 1% and EF 5%) for the protein structures of ten PPI targets obtained after Surflex docking, re-scoring with GOLD scoring functions, and the consensus scoring method. The best enrichment values corresponding to each target protein (across rows) for EF 1% and EF 5% are shown in bold.

| Target | PDB ID | Enrichment factors | Surflex    | GoldScore  | ChemScore  | ASP        | ChemPLP    | ChemScore RDS | Consensus scoring |
|--------|--------|--------------------|------------|------------|------------|------------|------------|---------------|-------------------|
| BAZ2B  | 4XUA   | EF 1%              | 0.77       | 0.77       | 1.2        | <b>1.4</b> | 0.92       | 1             | 1                 |
|        |        | EF 5%              | 0.88       | 0.94       | <b>1.1</b> | 1          | 0.95       | 0.98          | 1                 |
|        | 5E73   | EF 1%              | 0.86       | 0.7        | <b>1.3</b> | 1          | 1          | 1.1           | 0.93              |
|        |        | EF 5%              | 0.89       | 0.84       | <b>1</b>   | 0.98       | 0.93       | <b>1</b>      | 0.96              |
| Bcl-2  | 2O21   | EF 1%              | 25         | 26         | 23         | 22         | <b>28</b>  | 6.6           | 21                |
|        |        | EF 5%              | 11         | 11         | 10         | 11         | <b>13</b>  | 3.4           | 9.8               |
|        | 4LVT   | EF 1%              | <b>28</b>  | 27         | <b>28</b>  | <b>28</b>  | <b>28</b>  | 16            | <b>28</b>         |
|        |        | EF 5%              | 12         | 12         | 12         | 12         | <b>13</b>  | 6.2           | <b>13</b>         |
| Bcl-xL | 3INQ   | EF 1%              | 26         | 25         | 19         | 20         | <b>27</b>  | 7.3           | 21                |
|        |        | EF 5%              | <b>10</b>  | 8.8        | 8          | 7.8        | 9.9        | 3.6           | 8.6               |
|        | 3WIZ   | EF 1%              | 27         | 30         | 27         | 21         | <b>33</b>  | 6.5           | 30                |
|        |        | EF 5%              | 9.7        | 9.9        | 10         | 9.1        | <b>12</b>  | 3.3           | 11                |
| BRD4-1 | 5D3L   | EF 1%              | 0.96       | 1.4        | 1.9        | 1.9        | 1.9        | <b>2.2</b>    | 1.9               |
|        |        | EF 5%              | 1.4        | 1.7        | <b>1.9</b> | 1.7        | <b>1.9</b> | <b>1.9</b>    | 1.8               |
|        | 5KU3   | EF 1%              | 0.72       | 1.3        | 0.6        | <b>1.8</b> | 0.84       | 0.48          | 1.3               |
|        |        | EF 5%              | 0.43       | <b>1.4</b> | 1.2        | 1.3        | 1.1        | 1.1           | <b>1.4</b>        |
| CREBBP | 5EIC   | EF 1%              | 1.8        | 1.6        | 2.8        | 1.8        | 2.8        | 1.4           | <b>2.9</b>        |
|        |        | EF 5%              | 1.6        | 1.9        | 2.1        | <b>2.7</b> | 2.2        | 1.3           | 2.6               |
|        | 5MMG   | EF 1%              | <b>5.1</b> | 2.3        | 2.7        | 2.5        | 2.4        | 1.1           | 2.9               |
|        |        | EF 5%              | <b>2.7</b> | 2.1        | 1.9        | 2.4        | 1.9        | 1.3           | 2                 |
| HIV IN | 4CFD   | EF 1%              | <b>1.4</b> | 0.35       | 0.7        | 1.2        | 0.7        | 0.35          | <b>1.4</b>        |
|        |        | EF 5%              | <b>1.6</b> | 0.8        | 0.94       | 1.4        | 1.1        | 0.82          | 1.3               |
|        | 4CHO   | EF 1%              | 1.5        | 0.46       | 0.81       | <b>1.7</b> | 1.2        | 0.7           | 1.3               |
|        |        | EF 5%              | <b>1.6</b> | 0.96       | 0.91       | 1.4        | 1.3        | 0.77          | 1.3               |
| XIAP   | 1TFT   | EF 1%              | <b>42</b>  | 31         | 31         | 20         | 30         | 31            | 29                |
|        |        | EF 5%              | <b>15</b>  | 12         | 11         | 9.8        | 11         | 10            | 11                |
|        | 5C3H   | EF 1%              | 33         | 9.3        | 23         | 24         | 33         | 29            | <b>35</b>         |
|        |        | EF 5%              | <b>14</b>  | 6.8        | 9.7        | 9.5        | 12         | 11            | 12                |
| Mcl-1  | 5FC4   | EF 1%              | 6.1        | 8.3        | 11         | <b>12</b>  | 11         | 9.4           | 10                |
|        |        | EF 5%              | 2.8        | 3.9        | <b>4.4</b> | 3.6        | 4.2        | 4             | 4.1               |
|        | 5MES   | EF 1%              | 3.3        | <b>7.4</b> | 5.5        | 3.6        | 5.4        | 3.9           | 5.8               |
|        |        | EF 5%              | 2.5        | <b>3.5</b> | 2.7        | 2.5        | 2.6        | 2.2           | 2.8               |
| Mdm2   | 4ODF   | EF 1%              | <b>3</b>   | <b>3</b>   | 2.8        | 2.9        | 2.8        | 2.8           | 2.8               |
|        |        | EF 5%              | <b>2.9</b> | <b>2.9</b> | 2.7        | 2.7        | 2.7        | 2.2           | 2.8               |
|        | 4ZFI   | EF 1%              | 2.5        | <b>2.8</b> | 1.4        | 2          | 1.3        | 0.67          | 1.7               |
|        |        | EF 5%              | 1.9        | <b>2.4</b> | 1.4        | 1.6        | 1.2        | 0.7           | 1.5               |
| Menin  | 5DB2   | EF 1%              | 3.4        | <b>6</b>   | 2          | 5.3        | 5.3        | 1.6           | <b>6</b>          |
|        |        | EF 5%              | 1.9        | <b>2.4</b> | 1.9        | 2.2        | 2.1        | 1.7           | 2.3               |
|        | 6B41   | EF 1%              | 1          | <b>3.3</b> | 1.7        | 3          | 3.1        | 1.1           | 2.4               |
|        |        | EF 5%              | 1.2        | <b>1.9</b> | 1.1        | 1.7        | 1.6        | 0.94          | 1.2               |

**Table S2.** The AUC values for the PPI datasets screened using **32 protein SASA descriptors**: SASA receptor total unbound ( $T_{RU}$ ), SASA receptor total bound ( $T_{RB}$ ), SASA receptor total delta ( $\Delta T_R$ ), relative SASA receptor total (rel.  $T_R$ ), SASA receptor hydrophobic unbound ( $H_{RU}$ ), SASA receptor hydrophobic bound ( $H_{RB}$ ), SASA receptor hydrophobic delta ( $\Delta H_R$ ), relative SASA receptor hydrophobic (rel.  $H_R$ ), SASA receptor aromatic unbound ( $Ar_{RU}$ ), SASA receptor aromatic bound ( $Ar_{RB}$ ), SASA receptor aromatic delta ( $\Delta Ar_R$ ), relative SASA receptor aromatic (rel.  $Ar_R$ ), SASA receptor donor unbound ( $D_{RU}$ ), SASA receptor donor bound ( $D_{RB}$ ), SASA receptor donor delta ( $\Delta D_R$ ), relative SASA receptor donor (rel.  $D_R$ ), SASA receptor acceptor unbound ( $Ac_{RU}$ ), SASA receptor acceptor bound ( $Ac_{RB}$ ), SASA receptor acceptor delta ( $\Delta Ac_R$ ), relative SASA receptor acceptor (rel.  $Ac_R$ ), SASA receptor positive unbound ( $P_{RU}$ ), SASA receptor positive bound ( $P_{RB}$ ), SASA receptor positive delta ( $\Delta P_R$ ), relative SASA receptor positive (rel.  $P_R$ ), SASA receptor negative unbound ( $N_{RU}$ ), SASA receptor negative bound ( $N_{RB}$ ), SASA receptor negative delta ( $\Delta N_R$ ), relative SASA receptor negative (rel.  $N_R$ ), SASA receptor other unbound ( $O_{RU}$ ), SASA receptor other bound ( $O_{RB}$ ), SASA receptor other delta ( $\Delta O_R$ ), relative SASA receptor other (rel.  $O_R$ ); **32 ligand SASA descriptors**: SASA ligand total unbound ( $T_{LU}$ ), SASA ligand total bound ( $T_{LB}$ ), SASA ligand total delta ( $\Delta T_L$ ), relative SASA ligand total (rel.  $T_L$ ), SASA ligand hydrophobic unbound ( $H_{LU}$ ), SASA ligand hydrophobic bound ( $H_{LB}$ ), SASA ligand hydrophobic delta ( $\Delta H_L$ ), relative SASA ligand hydrophobic (rel.  $H_L$ ), SASA ligand aromatic unbound ( $Ar_{LU}$ ), SASA ligand aromatic bound ( $Ar_{LB}$ ), SASA ligand aromatic delta ( $\Delta Ar_L$ ), relative SASA ligand aromatic (rel.  $Ar_L$ ), SASA ligand donor unbound ( $D_{LU}$ ), SASA ligand donor bound ( $D_{LB}$ ), SASA ligand donor delta ( $\Delta D_L$ ), relative SASA ligand donor (rel.  $D_L$ ), SASA ligand acceptor unbound ( $Ac_{LU}$ ), SASA ligand acceptor bound ( $Ac_{LB}$ ), SASA ligand acceptor delta ( $\Delta Ac_L$ ), relative SASA ligand acceptor (rel.  $Ac_L$ ), SASA ligand positive unbound ( $P_{LU}$ ), SASA ligand positive bound ( $P_{LB}$ ), SASA ligand positive delta ( $\Delta P_L$ ), relative SASA ligand positive (rel.  $P_L$ ), SASA negative unbound ( $N_{LU}$ ), SASA ligand negative bound ( $N_{LB}$ ), SASA ligand negative delta ( $\Delta N_L$ ), relative SASA ligand negative (rel.  $N_L$ ), SASA ligand other unbound ( $O_{LU}$ ), SASA ligand other bound ( $O_{LB}$ ), SASA ligand other delta ( $\Delta O_L$ ), relative SASA ligand other (rel.  $O_L$ ); and **16 protein-ligand SASA descriptors**: SASA receptor ligand total delta ( $\Delta T_{RL}$ ), relative SASA receptor ligand total (rel.  $T_{RL}$ ), SASA receptor ligand hydrophobic delta ( $\Delta H_{RL}$ ), relative SASA receptor ligand hydrophobic (rel.  $H_{RL}$ ), SASA receptor ligand aromatic delta ( $\Delta Ar_{RL}$ ), relative SASA receptor ligand aromatic (rel.  $Ar_{RL}$ ), SASA receptor ligand donor delta ( $\Delta D_{RL}$ ), relative SASA receptor ligand donor (rel.  $D_{RL}$ ), SASA receptor ligand acceptor delta ( $\Delta Ac_{RL}$ ),

relative SASA receptor ligand acceptor (rel.  $Ac_{RL}$ ), SASA receptor ligand positive delta ( $\Delta P_{RL}$ ), relative SASA receptor ligand positive (rel.  $P_{RL}$ ), SASA receptor ligand negative delta ( $\Delta N_{RL}$ ), relative SASA receptor ligand negative (rel.  $N_{RL}$ ), SASA receptor ligand other delta ( $\Delta O_{RL}$ ), relative SASA receptor ligand other (rel.  $O_{RL}$ ). The best AUC score corresponding to each target protein (across columns) is indicated in bold and highlighted in green.

| SASA descriptors | BAZ2B |       | BCL2  |       | BCLXL |       | BRD4-1       |              | CREBBP |              | HIV-IN       |       | XIAP  |       | MCL1  |       | MDM2  |       | Menin |       |
|------------------|-------|-------|-------|-------|-------|-------|--------------|--------------|--------|--------------|--------------|-------|-------|-------|-------|-------|-------|-------|-------|-------|
|                  | 4XUA  | 5E73  | 2O21  | 4LVT  | 3INQ  | 3WIZ  | 5D3L         | 5KU3         | 5EIC   | 5MMG         | 4CFD         | 4CHO  | 1TFT  | 5C3H  | 5FC4  | 5MES  | 4ODF  | 4ZFI  | 5DB2  | 6B41  |
| Surflex          | 0.491 | 0.482 | 0.857 | 0.886 | 0.844 | 0.823 | 0.696        | 0.426        | 0.604  | <b>0.662</b> | 0.627        | 0.631 | 0.888 | 0.892 | 0.585 | 0.59  | 0.64  | 0.57  | 0.548 | 0.517 |
| $T_{RU}$         | 0.485 | 0.485 | 0.965 | 0.966 | 0.944 | 0.950 | 0.810        | 0.738        | 0.594  | 0.639        | 0.605        | 0.613 | 0.857 | 0.835 | 0.647 | 0.625 | 0.733 | 0.746 | 0.535 | 0.531 |
| $T_{RB}$         | 0.486 | 0.484 | 0.898 | 0.896 | 0.868 | 0.892 | 0.742        | 0.606        | 0.520  | 0.608        | 0.582        | 0.590 | 0.777 | 0.758 | 0.562 | 0.567 | 0.621 | 0.664 | 0.519 | 0.502 |
| $DT_R$           | 0.488 | 0.489 | 0.976 | 0.977 | 0.960 | 0.963 | 0.805        | 0.789        | 0.662  | 0.632        | 0.606        | 0.619 | 0.872 | 0.869 | 0.675 | 0.670 | 0.830 | 0.805 | 0.544 | 0.542 |
| rel. $T_R$       | 0.491 | 0.487 | 0.159 | 0.127 | 0.167 | 0.311 | 0.550        | 0.393        | 0.392  | 0.503        | 0.475        | 0.497 | 0.360 | 0.348 | 0.364 | 0.418 | 0.396 | 0.458 | 0.486 | 0.467 |
| $H_{RU}$         | 0.487 | 0.486 | 0.955 | 0.959 | 0.938 | 0.941 | 0.790        | 0.718        | 0.580  | 0.628        | 0.642        | 0.634 | 0.804 | 0.843 | 0.654 | 0.608 | 0.723 | 0.744 | 0.528 | 0.533 |
| $H_{RB}$         | 0.487 | 0.486 | 0.858 | 0.818 | 0.862 | 0.881 | 0.648        | 0.579        | 0.487  | 0.590        | 0.570        | 0.596 | 0.667 | 0.731 | 0.563 | 0.563 | 0.509 | 0.666 | 0.506 | 0.518 |
| $DH_R$           | 0.489 | 0.491 | 0.968 | 0.962 | 0.945 | 0.946 | <b>0.821</b> | 0.781        | 0.665  | 0.628        | <b>0.661</b> | 0.626 | 0.851 | 0.896 | 0.679 | 0.618 | 0.832 | 0.793 | 0.542 | 0.538 |
| rel. $H_R$       | 0.490 | 0.487 | 0.306 | 0.343 | 0.340 | 0.307 | 0.432        | 0.435        | 0.386  | 0.509        | 0.457        | 0.509 | 0.246 | 0.352 | 0.395 | 0.486 | 0.344 | 0.551 | 0.480 | 0.500 |
| $Ar_{RU}$        | 0.487 | 0.494 | 0.824 | 0.911 | 0.772 | 0.821 | 0.804        | 0.760        | 0.604  | 0.559        | 0.555        | 0.544 | 0.646 | 0.667 | 0.570 | 0.550 | 0.649 | 0.672 | 0.547 | 0.510 |
| $Ar_{RB}$        | 0.486 | 0.490 | 0.463 | 0.638 | 0.461 | 0.594 | 0.599        | 0.490        | 0.530  | 0.542        | 0.539        | 0.545 | 0.582 | 0.384 | 0.477 | 0.512 | 0.521 | 0.593 | 0.481 | 0.514 |
| $DAr_R$          | 0.495 | 0.502 | 0.927 | 0.936 | 0.896 | 0.868 | 0.801        | <b>0.799</b> | 0.545  | 0.542        | 0.551        | 0.548 | 0.656 | 0.681 | 0.617 | 0.587 | 0.781 | 0.704 | 0.527 | 0.496 |
| rel. $Ar_R$      | 0.490 | 0.487 | 0.202 | 0.318 | 0.208 | 0.375 | 0.353        | 0.283        | 0.502  | 0.503        | 0.508        | 0.475 | 0.409 | 0.336 | 0.434 | 0.437 | 0.459 | 0.463 | 0.479 | 0.509 |
| $D_{RU}$         | 0.496 | 0.493 | 0.845 | 0.897 | 0.838 | 0.820 | 0.758        | 0.621        | 0.515  | 0.635        | 0.553        | 0.516 | 0.746 | 0.777 | 0.570 | 0.608 | 0.667 | 0.616 | 0.548 | 0.537 |
| $D_{RB}$         | 0.500 | 0.499 | 0.628 | 0.580 | 0.501 | 0.617 | 0.743        | 0.606        | 0.498  | 0.528        | 0.539        | 0.504 | 0.659 | 0.584 | 0.495 | 0.546 | 0.655 | 0.469 | 0.507 | 0.469 |
| $DD_R$           | 0.489 | 0.490 | 0.881 | 0.928 | 0.872 | 0.874 | 0.488        | 0.519        | 0.522  | 0.649        | 0.518        | 0.527 | 0.758 | 0.708 | 0.584 | 0.624 | 0.623 | 0.745 | 0.551 | 0.555 |
| rel. $D_R$       | 0.503 | 0.500 | 0.298 | 0.198 | 0.175 | 0.332 | 0.711        | 0.582        | 0.486  | 0.431        | 0.515        | 0.503 | 0.535 | 0.454 | 0.436 | 0.417 | 0.496 | 0.358 | 0.479 | 0.449 |
| $Ac_{RU}$        | 0.497 | 0.494 | 0.912 | 0.833 | 0.774 | 0.832 | 0.489        | 0.498        | 0.626  | 0.584        | 0.548        | 0.586 | 0.704 | 0.689 | 0.601 | 0.570 | 0.670 | 0.633 | 0.521 | 0.552 |
| $Ac_{RB}$        | 0.501 | 0.500 | 0.849 | 0.734 | 0.732 | 0.651 | 0.519        | 0.462        | 0.598  | 0.559        | 0.519        | 0.534 | 0.393 | 0.565 | 0.566 | 0.508 | 0.631 | 0.608 | 0.519 | 0.535 |
| $DAc_R$          | 0.494 | 0.490 | 0.918 | 0.826 | 0.794 | 0.821 | 0.459        | 0.553        | 0.634  | 0.592        | 0.550        | 0.595 | 0.856 | 0.771 | 0.599 | 0.604 | 0.602 | 0.612 | 0.510 | 0.540 |
| rel. $Ac_R$      | 0.504 | 0.504 | 0.729 | 0.488 | 0.549 | 0.469 | 0.556        | 0.430        | 0.542  | 0.509        | 0.460        | 0.467 | 0.309 | 0.483 | 0.484 | 0.459 | 0.571 | 0.563 | 0.512 | 0.514 |



|                      |       |       |       |       |       |       |       |       |       |       |       |       |       |       |       |       |       |       |       |       |
|----------------------|-------|-------|-------|-------|-------|-------|-------|-------|-------|-------|-------|-------|-------|-------|-------|-------|-------|-------|-------|-------|
| P <sub>RU</sub>      | 0.500 | 0.500 | 0.735 | 0.776 | 0.699 | 0.808 | 0.502 | 0.501 | 0.474 | 0.531 | 0.535 | 0.534 | 0.767 | 0.679 | 0.502 | 0.599 | 0.593 | 0.503 | 0.506 | 0.508 |
| P <sub>RB</sub>      | 0.500 | 0.500 | 0.629 | 0.642 | 0.619 | 0.761 | 0.502 | 0.501 | 0.480 | 0.532 | 0.544 | 0.534 | 0.785 | 0.644 | 0.515 | 0.538 | 0.588 | 0.503 | 0.502 | 0.509 |
| DP <sub>R</sub>      | 0.500 | 0.500 | 0.831 | 0.834 | 0.731 | 0.803 | 0.502 | 0.501 | 0.462 | 0.507 | 0.518 | 0.524 | 0.648 | 0.631 | 0.508 | 0.646 | 0.588 | 0.504 | 0.506 | 0.500 |
| rel. P <sub>R</sub>  | 0.500 | 0.500 | 0.492 | 0.345 | 0.503 | 0.529 | 0.501 | 0.501 | 0.522 | 0.524 | 0.542 | 0.533 | 0.537 | 0.455 | 0.513 | 0.488 | 0.558 | 0.503 | 0.503 | 0.509 |
| N <sub>RU</sub>      | 0.497 | 0.496 | 0.911 | 0.810 | 0.833 | 0.796 | 0.728 | 0.587 | 0.500 | 0.521 | 0.524 | 0.526 | 0.524 | 0.740 | 0.527 | 0.561 | 0.505 | 0.502 | 0.515 | 0.498 |
| N <sub>RB</sub>      | 0.497 | 0.497 | 0.814 | 0.759 | 0.775 | 0.765 | 0.726 | 0.583 | 0.500 | 0.521 | 0.539 | 0.541 | 0.503 | 0.720 | 0.520 | 0.541 | 0.505 | 0.502 | 0.524 | 0.490 |
| DN <sub>R</sub>      | 0.499 | 0.498 | 0.927 | 0.844 | 0.797 | 0.814 | 0.623 | 0.582 | 0.497 | 0.515 | 0.492 | 0.504 | 0.541 | 0.689 | 0.532 | 0.584 | 0.505 | 0.502 | 0.505 | 0.509 |
| rel. N <sub>R</sub>  | 0.497 | 0.497 | 0.331 | 0.277 | 0.518 | 0.521 | 0.660 | 0.576 | 0.500 | 0.520 | 0.541 | 0.559 | 0.497 | 0.567 | 0.520 | 0.540 | 0.505 | 0.501 | 0.519 | 0.485 |
| O <sub>RU</sub>      | 0.489 | 0.490 | 0.738 | 0.804 | 0.762 | 0.746 | 0.537 | 0.540 | 0.563 | 0.549 | 0.533 | 0.531 | 0.529 | 0.609 | 0.533 | 0.500 | 0.589 | 0.624 | 0.514 | 0.502 |
| O <sub>RB</sub>      | 0.493 | 0.494 | 0.614 | 0.556 | 0.637 | 0.498 | 0.426 | 0.465 | 0.496 | 0.522 | 0.501 | 0.475 | 0.360 | 0.560 | 0.522 | 0.500 | 0.472 | 0.525 | 0.485 | 0.492 |
| DO <sub>R</sub>      | 0.487 | 0.489 | 0.732 | 0.789 | 0.734 | 0.705 | 0.639 | 0.583 | 0.614 | 0.550 | 0.535 | 0.559 | 0.735 | 0.648 | 0.521 | 0.500 | 0.623 | 0.658 | 0.524 | 0.510 |
| rel. O <sub>R</sub>  | 0.498 | 0.497 | 0.611 | 0.539 | 0.515 | 0.461 | 0.426 | 0.465 | 0.461 | 0.510 | 0.501 | 0.475 | 0.282 | 0.526 | 0.522 | 0.500 | 0.469 | 0.453 | 0.485 | 0.491 |
| T <sub>LU</sub>      | 0.487 | 0.486 | 0.977 | 0.978 | 0.970 | 0.968 | 0.752 | 0.744 | 0.638 | 0.641 | 0.607 | 0.616 | 0.942 | 0.944 | 0.691 | 0.697 | 0.840 | 0.844 | 0.547 | 0.543 |
| T <sub>LB</sub>      | 0.498 | 0.499 | 0.970 | 0.969 | 0.961 | 0.952 | 0.710 | 0.777 | 0.622 | 0.597 | 0.537 | 0.532 | 0.880 | 0.926 | 0.670 | 0.682 | 0.646 | 0.759 | 0.521 | 0.530 |
| DT <sub>L</sub>      | 0.480 | 0.478 | 0.964 | 0.966 | 0.950 | 0.958 | 0.711 | 0.580 | 0.605 | 0.616 | 0.638 | 0.651 | 0.927 | 0.873 | 0.661 | 0.653 | 0.842 | 0.809 | 0.551 | 0.543 |
| rel. T <sub>L</sub>  | 0.505 | 0.508 | 0.686 | 0.721 | 0.833 | 0.734 | 0.667 | 0.762 | 0.588 | 0.544 | 0.499 | 0.468 | 0.688 | 0.833 | 0.619 | 0.626 | 0.504 | 0.624 | 0.466 | 0.494 |
| H <sub>LU</sub>      | 0.510 | 0.509 | 0.900 | 0.899 | 0.840 | 0.843 | 0.543 | 0.532 | 0.634 | 0.634 | 0.499 | 0.504 | 0.556 | 0.558 | 0.671 | 0.674 | 0.705 | 0.709 | 0.448 | 0.445 |
| H <sub>LB</sub>      | 0.508 | 0.511 | 0.863 | 0.789 | 0.840 | 0.798 | 0.665 | 0.724 | 0.608 | 0.622 | 0.544 | 0.539 | 0.613 | 0.719 | 0.633 | 0.656 | 0.457 | 0.579 | 0.438 | 0.448 |
| DH <sub>L</sub>      | 0.508 | 0.505 | 0.820 | 0.863 | 0.757 | 0.798 | 0.472 | 0.380 | 0.612 | 0.602 | 0.469 | 0.478 | 0.460 | 0.361 | 0.643 | 0.638 | 0.723 | 0.664 | 0.461 | 0.453 |
| rel. H <sub>L</sub>  | 0.502 | 0.507 | 0.619 | 0.505 | 0.677 | 0.568 | 0.689 | 0.777 | 0.545 | 0.554 | 0.555 | 0.550 | 0.644 | 0.813 | 0.550 | 0.568 | 0.352 | 0.469 | 0.465 | 0.478 |
| Ar <sub>LU</sub>     | 0.522 | 0.521 | 0.836 | 0.829 | 0.877 | 0.890 | 0.510 | 0.501 | 0.652 | 0.650 | 0.471 | 0.478 | 0.554 | 0.562 | 0.725 | 0.727 | 0.292 | 0.307 | 0.422 | 0.417 |
| Ar <sub>LB</sub>     | 0.510 | 0.513 | 0.788 | 0.767 | 0.852 | 0.861 | 0.578 | 0.630 | 0.586 | 0.604 | 0.495 | 0.489 | 0.621 | 0.720 | 0.679 | 0.695 | 0.371 | 0.422 | 0.412 | 0.427 |
| DAr <sub>L</sub>     | 0.522 | 0.520 | 0.769 | 0.788 | 0.805 | 0.826 | 0.489 | 0.436 | 0.649 | 0.640 | 0.475 | 0.481 | 0.459 | 0.365 | 0.683 | 0.685 | 0.320 | 0.299 | 0.440 | 0.427 |
| rel. Ar <sub>L</sub> | 0.496 | 0.501 | 0.562 | 0.533 | 0.671 | 0.549 | 0.582 | 0.646 | 0.535 | 0.556 | 0.512 | 0.511 | 0.643 | 0.801 | 0.564 | 0.574 | 0.470 | 0.560 | 0.458 | 0.472 |
| D <sub>LU</sub>      | 0.487 | 0.487 | 0.731 | 0.730 | 0.640 | 0.645 | 0.524 | 0.530 | 0.421 | 0.421 | 0.481 | 0.499 | 0.905 | 0.898 | 0.584 | 0.586 | 0.520 | 0.521 | 0.456 | 0.456 |
| D <sub>LB</sub>      | 0.497 | 0.491 | 0.712 | 0.742 | 0.705 | 0.680 | 0.516 | 0.562 | 0.458 | 0.451 | 0.477 | 0.491 | 0.750 | 0.543 | 0.589 | 0.595 | 0.519 | 0.516 | 0.455 | 0.477 |
| DD <sub>L</sub>      | 0.487 | 0.489 | 0.683 | 0.654 | 0.579 | 0.590 | 0.510 | 0.485 | 0.420 | 0.419 | 0.489 | 0.511 | 0.909 | 0.921 | 0.555 | 0.558 | 0.493 | 0.494 | 0.463 | 0.454 |
| rel. D <sub>L</sub>  | 0.495 | 0.489 | 0.666 | 0.698 | 0.699 | 0.661 | 0.510 | 0.557 | 0.461 | 0.454 | 0.485 | 0.498 | 0.632 | 0.458 | 0.572 | 0.585 | 0.477 | 0.481 | 0.463 | 0.479 |
| Ac <sub>LU</sub>     | 0.496 | 0.496 | 0.871 | 0.869 | 0.731 | 0.737 | 0.675 | 0.680 | 0.528 | 0.525 | 0.518 | 0.515 | 0.502 | 0.511 | 0.586 | 0.583 | 0.563 | 0.572 | 0.493 | 0.491 |
| Ac <sub>LB</sub>     | 0.495 | 0.498 | 0.870 | 0.870 | 0.739 | 0.766 | 0.569 | 0.633 | 0.589 | 0.549 | 0.464 | 0.468 | 0.528 | 0.530 | 0.580 | 0.586 | 0.595 | 0.617 | 0.475 | 0.502 |

|                       |       |       |       |       |       |       |       |       |       |       |       |       |       |       |       |       |       |       |       |       |
|-----------------------|-------|-------|-------|-------|-------|-------|-------|-------|-------|-------|-------|-------|-------|-------|-------|-------|-------|-------|-------|-------|
| DAc <sub>L</sub>      | 0.499 | 0.496 | 0.740 | 0.723 | 0.646 | 0.629 | 0.659 | 0.630 | 0.491 | 0.518 | 0.550 | 0.548 | 0.477 | 0.498 | 0.539 | 0.538 | 0.529 | 0.512 | 0.505 | 0.491 |
| rel. Ac <sub>L</sub>  | 0.497 | 0.500 | 0.754 | 0.724 | 0.655 | 0.700 | 0.523 | 0.570 | 0.593 | 0.545 | 0.458 | 0.470 | 0.540 | 0.528 | 0.548 | 0.556 | 0.575 | 0.597 | 0.476 | 0.513 |
| P <sub>LU</sub>       | 0.511 | 0.510 | 0.688 | 0.686 | 0.618 | 0.611 | 0.495 | 0.494 | 0.491 | 0.492 | 0.459 | 0.459 | 0.542 | 0.577 | 0.539 | 0.539 | 0.504 | 0.503 | 0.481 | 0.482 |
| P <sub>LB</sub>       | 0.503 | 0.505 | 0.608 | 0.599 | 0.549 | 0.585 | 0.496 | 0.498 | 0.498 | 0.497 | 0.474 | 0.480 | 0.497 | 0.491 | 0.526 | 0.536 | 0.512 | 0.486 | 0.485 | 0.493 |
| DP <sub>L</sub>       | 0.510 | 0.509 | 0.610 | 0.609 | 0.585 | 0.550 | 0.496 | 0.494 | 0.491 | 0.491 | 0.461 | 0.462 | 0.546 | 0.581 | 0.524 | 0.511 | 0.487 | 0.507 | 0.482 | 0.482 |
| rel. P <sub>L</sub>   | 0.503 | 0.505 | 0.615 | 0.605 | 0.552 | 0.589 | 0.496 | 0.498 | 0.498 | 0.497 | 0.474 | 0.480 | 0.497 | 0.491 | 0.527 | 0.537 | 0.514 | 0.485 | 0.485 | 0.493 |
| N <sub>LU</sub>       | 0.500 | 0.500 | 0.519 | 0.519 | 0.665 | 0.665 | 0.493 | 0.493 | 0.476 | 0.476 | 0.492 | 0.495 | 0.501 | 0.501 | 0.599 | 0.599 | 0.595 | 0.595 | 0.492 | 0.492 |
| N <sub>LB</sub>       | 0.500 | 0.500 | 0.518 | 0.520 | 0.666 | 0.664 | 0.493 | 0.495 | 0.477 | 0.476 | 0.492 | 0.492 | 0.503 | 0.504 | 0.594 | 0.593 | 0.594 | 0.591 | 0.492 | 0.496 |
| DN <sub>L</sub>       | 0.500 | 0.500 | 0.519 | 0.518 | 0.664 | 0.666 | 0.493 | 0.493 | 0.476 | 0.476 | 0.492 | 0.492 | 0.499 | 0.499 | 0.597 | 0.598 | 0.594 | 0.591 | 0.492 | 0.491 |
| rel. N <sub>L</sub>   | 0.500 | 0.500 | 0.518 | 0.520 | 0.667 | 0.664 | 0.493 | 0.495 | 0.477 | 0.476 | 0.493 | 0.493 | 0.504 | 0.504 | 0.594 | 0.593 | 0.594 | 0.591 | 0.492 | 0.496 |
| O <sub>LU</sub>       | 0.477 | 0.477 | 0.953 | 0.952 | 0.897 | 0.897 | 0.645 | 0.633 | 0.555 | 0.559 | 0.604 | 0.609 | 0.931 | 0.933 | 0.507 | 0.505 | 0.657 | 0.655 | 0.611 | 0.608 |
| O <sub>LB</sub>       | 0.494 | 0.494 | 0.906 | 0.923 | 0.885 | 0.858 | 0.680 | 0.698 | 0.589 | 0.567 | 0.556 | 0.550 | 0.893 | 0.932 | 0.546 | 0.541 | 0.623 | 0.635 | 0.598 | 0.583 |
| DO <sub>L</sub>       | 0.472 | 0.471 | 0.942 | 0.940 | 0.865 | 0.885 | 0.576 | 0.543 | 0.528 | 0.548 | 0.611 | 0.615 | 0.901 | 0.850 | 0.483 | 0.478 | 0.628 | 0.623 | 0.602 | 0.604 |
| rel. O <sub>L</sub>   | 0.509 | 0.512 | 0.517 | 0.659 | 0.730 | 0.632 | 0.657 | 0.679 | 0.574 | 0.534 | 0.498 | 0.460 | 0.693 | 0.806 | 0.570 | 0.570 | 0.564 | 0.572 | 0.532 | 0.509 |
| DT <sub>RL</sub>      | 0.483 | 0.482 | 0.971 | 0.973 | 0.957 | 0.962 | 0.775 | 0.696 | 0.638 | 0.635 | 0.629 | 0.645 | 0.918 | 0.880 | 0.674 | 0.668 | 0.860 | 0.822 | 0.549 | 0.543 |
| rel. T <sub>RL</sub>  | 0.498 | 0.498 | 0.365 | 0.388 | 0.567 | 0.556 | 0.696 | 0.714 | 0.502 | 0.536 | 0.471 | 0.468 | 0.578 | 0.781 | 0.548 | 0.565 | 0.456 | 0.581 | 0.469 | 0.477 |
| DH <sub>RL</sub>      | 0.501 | 0.499 | 0.960 | 0.954 | 0.922 | 0.941 | 0.652 | 0.545 | 0.675 | 0.647 | 0.545 | 0.539 | 0.697 | 0.633 | 0.699 | 0.662 | 0.830 | 0.775 | 0.483 | 0.472 |
| rel. H <sub>RL</sub>  | 0.491 | 0.492 | 0.415 | 0.377 | 0.504 | 0.381 | 0.569 | 0.657 | 0.413 | 0.507 | 0.523 | 0.544 | 0.485 | 0.679 | 0.436 | 0.529 | 0.307 | 0.525 | 0.460 | 0.486 |
| DA <sub>rRL</sub>     | 0.520 | 0.519 | 0.903 | 0.914 | 0.912 | 0.906 | 0.638 | 0.588 | 0.651 | 0.640 | 0.496 | 0.508 | 0.567 | 0.484 | 0.706 | 0.700 | 0.415 | 0.416 | 0.454 | 0.486 |
| rel. A <sub>rRL</sub> | 0.482 | 0.488 | 0.339 | 0.401 | 0.397 | 0.457 | 0.492 | 0.528 | 0.477 | 0.481 | 0.527 | 0.526 | 0.572 | 0.611 | 0.496 | 0.475 | 0.453 | 0.575 | 0.455 | 0.490 |
| DD <sub>RL</sub>      | 0.487 | 0.490 | 0.868 | 0.903 | 0.845 | 0.806 | 0.521 | 0.498 | 0.437 | 0.481 | 0.500 | 0.514 | 0.928 | 0.934 | 0.595 | 0.628 | 0.605 | 0.669 | 0.511 | 0.501 |
| rel. D <sub>RL</sub>  | 0.502 | 0.500 | 0.323 | 0.268 | 0.245 | 0.407 | 0.694 | 0.605 | 0.532 | 0.500 | 0.522 | 0.496 | 0.391 | 0.320 | 0.465 | 0.440 | 0.549 | 0.404 | 0.484 | 0.468 |
| DAC <sub>RL</sub>     | 0.497 | 0.493 | 0.821 | 0.813 | 0.708 | 0.695 | 0.650 | 0.634 | 0.533 | 0.541 | 0.553 | 0.575 | 0.563 | 0.584 | 0.552 | 0.558 | 0.547 | 0.543 | 0.506 | 0.500 |
| rel. AC <sub>RL</sub> | 0.501 | 0.503 | 0.803 | 0.672 | 0.653 | 0.695 | 0.495 | 0.508 | 0.588 | 0.523 | 0.459 | 0.460 | 0.449 | 0.517 | 0.569 | 0.550 | 0.593 | 0.612 | 0.478 | 0.514 |
| DP <sub>RL</sub>      | 0.510 | 0.509 | 0.833 | 0.835 | 0.740 | 0.802 | 0.499 | 0.495 | 0.458 | 0.506 | 0.511 | 0.492 | 0.649 | 0.632 | 0.514 | 0.646 | 0.586 | 0.509 | 0.494 | 0.481 |
| rel. P <sub>RL</sub>  | 0.503 | 0.505 | 0.492 | 0.345 | 0.495 | 0.534 | 0.498 | 0.499 | 0.524 | 0.524 | 0.542 | 0.519 | 0.535 | 0.454 | 0.520 | 0.486 | 0.556 | 0.486 | 0.494 | 0.501 |
| DN <sub>RL</sub>      | 0.499 | 0.498 | 0.923 | 0.837 | 0.863 | 0.848 | 0.613 | 0.573 | 0.473 | 0.489 | 0.493 | 0.490 | 0.532 | 0.674 | 0.625 | 0.658 | 0.596 | 0.589 | 0.498 | 0.502 |
| rel. N <sub>RL</sub>  | 0.497 | 0.496 | 0.332 | 0.282 | 0.481 | 0.499 | 0.662 | 0.575 | 0.481 | 0.501 | 0.521 | 0.553 | 0.509 | 0.569 | 0.589 | 0.564 | 0.597 | 0.583 | 0.526 | 0.497 |
| DO <sub>RL</sub>      | 0.472 | 0.471 | 0.942 | 0.940 | 0.867 | 0.886 | 0.577 | 0.544 | 0.532 | 0.550 | 0.611 | 0.615 | 0.901 | 0.851 | 0.483 | 0.478 | 0.630 | 0.632 | 0.602 | 0.604 |
| rel. O <sub>RL</sub>  | 0.509 | 0.513 | 0.516 | 0.658 | 0.724 | 0.617 | 0.657 | 0.679 | 0.573 | 0.531 | 0.498 | 0.460 | 0.693 | 0.811 | 0.570 | 0.570 | 0.562 | 0.565 | 0.532 | 0.510 |

**Table S3.** The percent improvement or depreciation in the AUC values with respect to the Surflex scoring function for the 10 PPI targets (20 protein structures) using different SASA scoring methods. The positive value indicates a percent increase in the AUC, while the negative value indicates a percent decrease in the AUC. The AUC values with an improvement greater than 10% are shown in bold and are highlighted in green.

| SASA descriptor      | BAZ2B |      | BCL2         |              | BCLXL        |              | BRD4-1       |              | CREBBP       |        | HIV-IN |        | XIAP   |        | MCL1         |              | MDM2         |              | Menin  |        |
|----------------------|-------|------|--------------|--------------|--------------|--------------|--------------|--------------|--------------|--------|--------|--------|--------|--------|--------------|--------------|--------------|--------------|--------|--------|
|                      | 4XUA  | 5E73 | 2021         | 4LVT         | 3INQ         | 3WIZ         | 5D3L         | 5KU3         | 5EIC         | 5MMG   | 4CFD   | 4CHO   | 1TFT   | 5C3H   | 5FC4         | 5MES         | 4ODF         | 4ZFI         | 5DB2   | 6B41   |
| T <sub>RU</sub>      | -1.19 | 0.57 | <b>12.59</b> | 9.02         | <b>11.89</b> | <b>15.43</b> | <b>16.33</b> | <b>73.29</b> | -1.61        | -3.47  | -3.44  | -2.85  | -3.52  | -6.44  | <b>10.58</b> | 5.88         | <b>14.54</b> | <b>30.94</b> | -2.38  | 2.63   |
| T <sub>RB</sub>      | -1.07 | 0.48 | 4.74         | 1.08         | 2.89         | 8.35         | 6.64         | <b>42.23</b> | -13.99       | -8.21  | -7.13  | -6.45  | -12.56 | -15.05 | -3.88        | -3.84        | -3.01        | <b>16.54</b> | -5.38  | -2.97  |
| ΔT <sub>R</sub>      | -0.57 | 1.52 | <b>13.92</b> | <b>10.32</b> | <b>13.77</b> | <b>16.97</b> | <b>15.73</b> | <b>85.31</b> | 9.64         | -4.50  | -3.39  | -1.93  | -1.83  | -2.62  | <b>15.33</b> | <b>13.58</b> | <b>29.64</b> | <b>41.23</b> | -0.70  | 4.79   |
| rel. T <sub>R</sub>  | -0.07 | 0.99 | -81.47       | -85.64       | -80.23       | -62.23       | -21.03       | -7.64        | -35.07       | -23.99 | -24.28 | -21.28 | -59.47 | -61.02 | -37.75       | -29.21       | -38.06       | -19.71       | -11.31 | -9.64  |
| H <sub>RU</sub>      | -0.89 | 0.79 | <b>11.43</b> | 8.27         | <b>11.15</b> | <b>14.30</b> | <b>13.48</b> | <b>68.65</b> | -3.93        | -5.11  | 2.43   | 0.53   | -9.50  | -5.54  | <b>11.79</b> | 3.06         | <b>12.94</b> | <b>30.45</b> | -3.68  | 3.13   |
| H <sub>RB</sub>      | -0.76 | 0.76 | 0.15         | -7.70        | 2.12         | 7.10         | -6.95        | <b>35.80</b> | -19.32       | -10.92 | -9.06  | -5.49  | -24.94 | -18.10 | -3.77        | -4.54        | -20.43       | <b>16.92</b> | -7.67  | 0.16   |
| ΔH <sub>R</sub>      | -0.42 | 1.85 | <b>12.90</b> | 8.59         | <b>11.92</b> | <b>15.00</b> | <b>17.94</b> | <b>83.23</b> | <b>10.06</b> | -5.19  | 5.38   | -0.78  | -4.19  | 0.42   | <b>16.10</b> | 4.75         | <b>29.94</b> | <b>39.06</b> | -1.09  | 4.01   |
| rel. H <sub>R</sub>  | -0.26 | 1.11 | -64.30       | -61.25       | -59.75       | -62.69       | -37.89       | 2.15         | -36.07       | -23.06 | -27.06 | -19.36 | -72.29 | -60.58 | -32.53       | -17.55       | -46.18       | -3.28        | -12.34 | -3.31  |
| Ar <sub>RU</sub>     | -0.85 | 2.44 | -3.84        | 2.84         | -8.58        | -0.28        | <b>15.48</b> | <b>78.29</b> | 0.07         | -15.55 | -11.50 | -13.77 | -27.24 | -25.21 | -2.64        | -6.77        | 1.40         | <b>17.97</b> | -0.10  | -1.27  |
| Ar <sub>RB</sub>     | -1.08 | 1.70 | -45.95       | -28.04       | -45.38       | -27.86       | -14.01       | <b>15.06</b> | -12.31       | -18.06 | -14.11 | -13.58 | -34.43 | -56.99 | -18.48       | -13.23       | -18.53       | 4.03         | -12.17 | -0.53  |
| ΔAr <sub>R</sub>     | 0.78  | 4.15 | 8.12         | 5.67         | 6.21         | 5.46         | <b>15.11</b> | <b>87.47</b> | -9.78        | -18.06 | -12.04 | -13.12 | -26.13 | -23.64 | 5.45         | -0.49        | <b>22.04</b> | <b>23.57</b> | -3.78  | -4.10  |
| rel. Ar <sub>R</sub> | -0.27 | 1.11 | -76.42       | -64.07       | -75.37       | -54.49       | -49.22       | -33.50       | -16.90       | -24.00 | -18.90 | -24.72 | -53.90 | -62.34 | -25.75       | -25.94       | -28.29       | -18.80       | -12.55 | -1.58  |
| D <sub>RU</sub>      | 0.92  | 2.37 | -1.37        | 1.21         | -0.71        | -0.31        | 8.86         | <b>45.72</b> | -14.66       | -4.06  | -11.84 | -18.20 | -15.98 | -12.84 | -2.63        | 3.03         | 4.22         | 8.05         | 0.04   | 3.81   |
| D <sub>RB</sub>      | 1.82  | 3.43 | -26.68       | -34.56       | -40.65       | -25.03       | 6.79         | <b>42.22</b> | -17.56       | -20.28 | -14.02 | -20.11 | -25.77 | -34.53 | -15.41       | -7.42        | 2.37         | -17.65       | -7.50  | -9.32  |
| ΔD <sub>R</sub>      | -0.35 | 1.66 | 2.81         | 4.71         | 3.32         | 6.17         | -29.94       | <b>21.93</b> | -13.63       | -1.95  | -17.34 | -16.46 | -14.60 | -20.68 | -0.10        | 5.78         | -2.65        | <b>30.70</b> | 0.47   | 7.44   |
| rel. D <sub>R</sub>  | 2.38  | 3.64 | -65.25       | -77.68       | -79.23       | -59.68       | 2.10         | <b>36.54</b> | -19.59       | -34.89 | -17.86 | -20.29 | -39.77 | -49.08 | -25.55       | -29.39       | -22.56       | -37.16       | -12.53 | -13.25 |
| Ac <sub>RU</sub>     | 1.28  | 2.49 | 6.43         | -5.95        | -8.33        | 1.05         | -29.75       | <b>17.00</b> | 3.67         | -11.71 | -12.60 | -7.12  | -20.77 | -22.74 | 2.79         | -3.33        | 4.74         | <b>11.08</b> | -4.99  | 6.80   |
| Ac <sub>RB</sub>     | 2.10  | 3.67 | -0.96        | -17.16       | -13.29       | -20.91       | -25.44       | 8.53         | -0.96        | -15.61 | -17.24 | -15.37 | -55.75 | -36.62 | -3.19        | -13.83       | -1.38        | 6.71         | -5.22  | 3.38   |
| ΔAc <sub>R</sub>     | 0.67  | 1.74 | 7.12         | -6.76        | -5.97        | -0.24        | -34.05       | <b>29.86</b> | 5.05         | -10.51 | -12.27 | -5.73  | -3.57  | -13.54 | 2.46         | 2.30         | -6.01        | 7.30         | -7.00  | 4.41   |
| rel. Ac <sub>R</sub> | 2.74  | 4.57 | -14.89       | -44.89       | -34.94       | -43.03       | -20.10       | 0.87         | -10.21       | -23.05 | -26.59 | -26.05 | -65.18 | -45.89 | -17.29       | -22.18       | -10.73       | -1.28        | -6.66  | -0.64  |
| P <sub>RU</sub>      | 1.86  | 3.72 | -14.21       | -12.40       | -17.14       | -1.87        | -27.88       | <b>17.67</b> | -21.46       | -19.79 | -14.74 | -15.42 | -13.63 | -23.92 | -14.24       | 1.59         | -7.31        | -11.71       | -7.73  | -1.70  |
| P <sub>RB</sub>      | 1.86  | 3.72 | -26.61       | -27.59       | -26.66       | -7.54        | -27.91       | <b>17.67</b> | -20.51       | -19.58 | -13.16 | -15.39 | -11.65 | -27.81 | -11.90       | -8.79        | -8.06        | -11.71       | -8.44  | -1.63  |

|               |       |       |        |        |        |        |        |        |        |        |        |        |        |        |        |        |        |        |        |        |
|---------------|-------|-------|--------|--------|--------|--------|--------|--------|--------|--------|--------|--------|--------|--------|--------|--------|--------|--------|--------|--------|
| $\Delta P_R$  | 1.85  | 3.73  | -3.03  | -5.84  | -13.38 | -2.39  | -27.93 | 17.53  | -23.45 | -23.47 | -17.36 | -16.92 | -27.05 | -29.27 | -13.22 | 9.43   | -8.20  | -11.57 | -7.66  | -3.33  |
| rel. $P_R$    | 1.86  | 3.72  | -42.64 | -61.10 | -40.46 | -35.69 | -27.95 | 17.67  | -13.60 | -20.89 | -13.63 | -15.46 | -39.51 | -48.94 | -12.35 | -17.23 | -12.79 | -11.72 | -8.24  | -1.63  |
| $N_{RU}$      | 1.20  | 2.93  | 6.31   | -8.62  | -1.33  | -3.31  | 4.62   | 37.71  | -17.27 | -21.25 | -16.47 | -16.69 | -41.05 | -17.00 | -9.95  | -4.85  | -21.09 | -11.99 | -5.95  | -3.59  |
| $N_{RB}$      | 1.21  | 3.02  | -5.02  | -14.35 | -8.15  | -7.04  | 4.33   | 36.95  | -17.17 | -21.24 | -14.06 | -14.24 | -43.33 | -19.25 | -11.18 | -8.39  | -21.09 | -12.01 | -4.32  | -5.20  |
| $\Delta N_R$  | 1.69  | 3.24  | 8.22   | -4.73  | -5.53  | -1.14  | -10.54 | 36.69  | -17.74 | -22.24 | -21.61 | -20.17 | -39.03 | -22.74 | -9.11  | -1.06  | -21.11 | -11.87 | -7.80  | -1.47  |
| rel. $N_R$    | 1.21  | 3.04  | -61.40 | -68.73 | -38.61 | -36.67 | -5.21  | 35.29  | -17.16 | -21.47 | -13.78 | -11.46 | -43.98 | -36.48 | -11.18 | -8.41  | -21.09 | -12.02 | -5.33  | -6.17  |
| $O_{RU}$      | -0.49 | 1.67  | -13.89 | -9.28  | -9.77  | -9.37  | -22.78 | 26.71  | -6.78  | -17.13 | -14.96 | -15.88 | -40.41 | -31.68 | -8.93  | -15.26 | -7.99  | 9.51   | -6.17  | -2.87  |
| $O_{RB}$      | 0.36  | 2.41  | -28.40 | -37.24 | -24.51 | -39.45 | -38.78 | 9.19   | -17.81 | -21.14 | -20.08 | -24.78 | -59.46 | -37.20 | -10.82 | -15.26 | -26.32 | -7.96  | -11.46 | -4.88  |
| $\Delta O_R$  | -0.84 | 1.46  | -14.64 | -10.98 | -13.06 | -14.39 | -8.16  | 36.86  | 1.65   | -16.87 | -14.63 | -11.44 | -17.21 | -27.32 | -10.90 | -15.25 | -2.60  | 15.36  | -4.40  | -1.27  |
| rel. $O_R$    | 1.33  | 3.11  | -28.67 | -39.15 | -38.94 | -43.99 | -38.78 | 9.19   | -23.73 | -23.04 | -20.09 | -24.78 | -68.29 | -40.98 | -10.80 | -15.26 | -26.79 | -20.57 | -11.50 | -5.00  |
| $T_{LU}$      | -0.83 | 0.87  | 13.99  | 10.34  | 14.88  | 17.65  | 8.08   | 74.70  | 5.55   | -3.10  | -3.20  | -2.38  | 6.11   | 5.84   | 18.07  | 18.07  | 31.22  | 48.00  | -0.17  | 4.93   |
| $T_{LB}$      | 1.46  | 3.57  | 13.23  | 9.40   | 13.81  | 15.71  | 1.99   | 82.28  | 3.06   | -9.76  | -14.37 | -15.65 | -0.93  | 3.77   | 14.47  | 15.62  | 0.99   | 33.15  | -4.86  | 2.45   |
| $\Delta T_L$  | -2.18 | -0.78 | 12.48  | 8.98   | 12.54  | 16.35  | 2.10   | 36.17  | 0.22   | -6.98  | 1.79   | 3.19   | 4.42   | -2.10  | 13.06  | 10.75  | 31.52  | 41.88  | 0.47   | 5.06   |
| rel. $T_L$    | 2.91  | 5.38  | -19.99 | -18.62 | -1.25  | -10.82 | -4.22  | 78.76  | -2.66  | -17.87 | -20.49 | -25.82 | -22.55 | -6.59  | 5.89   | 6.12   | -21.25 | 9.41   | -14.97 | -4.50  |
| $H_{LU}$      | 3.84  | 5.67  | 5.03   | 1.42   | -0.43  | 2.37   | -22.02 | 24.82  | 4.93   | -4.22  | -20.47 | -20.12 | -37.41 | -37.45 | 14.75  | 14.17  | 10.15  | 24.38  | -18.25 | -13.99 |
| $H_{LB}$      | 3.48  | 6.10  | 0.75   | -10.92 | -0.49  | -3.03  | -4.43  | 70.00  | 0.74   | -6.02  | -13.29 | -14.56 | -30.95 | -19.40 | 8.18   | 11.24  | -28.64 | 1.65   | -20.15 | -13.28 |
| $\Delta H_L$  | 3.51  | 4.73  | -4.35  | -2.63  | -10.28 | -3.05  | -32.14 | -10.88 | 1.24   | -9.03  | -25.15 | -24.32 | -48.25 | -59.57 | 9.99   | 8.10   | 12.93  | 16.51  | -15.84 | -12.47 |
| rel. $H_L$    | 2.22  | 5.23  | -27.78 | -43.01 | -19.83 | -31.02 | -1.06  | 82.46  | -9.85  | -16.26 | -11.48 | -12.81 | -27.48 | -8.86  | -5.92  | -3.68  | -44.93 | -17.68 | -15.20 | -7.56  |
| $Ar_{LU}$     | 6.37  | 8.18  | -2.40  | -6.46  | 3.88   | 8.08   | -26.72 | 17.64  | 8.01   | -1.78  | -24.87 | -24.18 | -37.58 | -36.97 | 23.89  | 23.29  | -54.39 | -46.23 | -23.02 | -19.32 |
| $Ar_{LB}$     | 3.87  | 6.45  | -8.01  | -13.39 | 1.01   | 4.61   | -16.97 | 47.96  | -2.91  | -8.69  | -21.11 | -22.58 | -30.01 | -19.26 | 16.06  | 17.80  | -42.04 | -26.01 | -24.75 | -17.38 |
| $\Delta Ar_L$ | 6.30  | 7.84  | -10.27 | -11.05 | -4.65  | 0.30   | -29.78 | 2.40   | 7.45   | -3.32  | -24.27 | -23.73 | -48.35 | -59.03 | 16.69  | 16.11  | -49.97 | -47.47 | -19.63 | -17.42 |
| rel. $Ar_L$   | 1.04  | 3.88  | -34.44 | -39.79 | -20.55 | -33.32 | -16.36 | 51.74  | -11.42 | -15.97 | -18.29 | -19.01 | -27.61 | -10.22 | -3.64  | -2.70  | -26.51 | -1.71  | -16.46 | -8.66  |
| $D_{LU}$      | -0.77 | 1.06  | -14.70 | -17.60 | -24.16 | -21.60 | -24.66 | 24.46  | -30.26 | -36.46 | -23.23 | -20.87 | 1.93   | 0.71   | -0.22  | -0.65  | -18.76 | -8.53  | -16.72 | -11.86 |
| $D_{LB}$      | 1.29  | 1.85  | -16.93 | -16.22 | -16.52 | -17.33 | -25.87 | 31.99  | -24.12 | -31.85 | -23.87 | -22.17 | -15.53 | -39.10 | 0.69   | 0.81   | -18.85 | -9.46  | -17.04 | -7.66  |
| $\Delta D_L$  | -0.75 | 1.52  | -20.30 | -26.23 | -31.42 | -28.34 | -26.71 | 13.93  | -30.53 | -36.76 | -21.95 | -18.99 | 2.39   | 3.26   | -5.18  | -5.49  | -22.92 | -13.29 | -15.48 | -12.24 |
| rel. $D_L$    | 0.78  | 1.38  | -22.34 | -21.21 | -17.14 | -19.66 | -26.69 | 30.67  | -23.59 | -31.41 | -22.72 | -21.11 | -28.83 | -48.71 | -2.27  | -0.92  | -25.54 | -15.67 | -15.57 | -7.38  |
| $Ac_{LU}$     | 1.09  | 2.89  | 1.62   | -1.91  | -13.34 | -10.41 | -3.05  | 59.57  | -12.51 | -20.70 | -17.39 | -18.41 | -43.52 | -42.75 | 0.16   | -1.19  | -12.08 | 0.29   | -9.99  | -5.04  |
| $Ac_{LB}$     | 0.88  | 3.35  | 1.47   | -1.78  | -12.46 | -6.95  | -18.26 | 48.59  | -2.41  | -17.02 | -26.07 | -25.79 | -40.57 | -40.62 | -0.84  | -0.66  | -7.11  | 8.21   | -13.34 | -2.96  |
| $\Delta Ac_L$ | 1.58  | 2.93  | -13.63 | -18.36 | -23.49 | -23.59 | -5.30  | 47.84  | -18.71 | -21.82 | -12.31 | -13.12 | -46.33 | -44.19 | -7.85  | -8.84  | -17.39 | -10.21 | -7.87  | -4.99  |
| rel. $Ac_L$   | 1.15  | 3.66  | -11.99 | -18.32 | -22.40 | -14.91 | -24.87 | 33.78  | -1.75  | -17.61 | -27.03 | -25.45 | -39.17 | -40.79 | -6.35  | -5.84  | -10.22 | 4.69   | -13.12 | -0.79  |



|                       |       |       |        |        |        |        |        |       |        |        |        |        |        |        |        |        |        |        |        |       |
|-----------------------|-------|-------|--------|--------|--------|--------|--------|-------|--------|--------|--------|--------|--------|--------|--------|--------|--------|--------|--------|-------|
| P <sub>LU</sub>       | 4.07  | 5.90  | -19.67 | -22.53 | -26.74 | -25.71 | -28.86 | 15.88 | -18.64 | -25.75 | -26.75 | -27.29 | -39.00 | -35.32 | -7.90  | -8.62  | -21.28 | -11.78 | -12.30 | -6.82 |
| P <sub>LB</sub>       | 2.50  | 4.76  | -29.07 | -32.39 | -34.92 | -28.86 | -28.74 | 16.95 | -17.61 | -24.87 | -24.41 | -23.96 | -44.05 | -44.99 | -10.07 | -9.18  | -20.03 | -14.82 | -11.55 | -4.61 |
| ΔP <sub>L</sub>       | 3.79  | 5.62  | -28.84 | -31.22 | -30.72 | -33.12 | -28.78 | 15.99 | -18.67 | -25.76 | -26.51 | -26.77 | -38.52 | -34.91 | -10.35 | -13.43 | -23.93 | -11.03 | -12.01 | -6.73 |
| rel. P <sub>L</sub>   | 2.52  | 4.78  | -28.22 | -31.71 | -34.65 | -28.39 | -28.74 | 16.95 | -17.61 | -24.87 | -24.41 | -23.98 | -44.04 | -45.00 | -9.92  | -8.95  | -19.72 | -14.83 | -11.57 | -4.60 |
| N <sub>LU</sub>       | 1.81  | 3.70  | -39.39 | -41.38 | -21.19 | -19.15 | -29.20 | 15.68 | -21.14 | -28.05 | -21.54 | -21.53 | -43.53 | -43.79 | 2.44   | 1.47   | -7.02  | 4.39   | -10.28 | -4.92 |
| N <sub>LB</sub>       | 1.88  | 3.68  | -39.58 | -41.31 | -21.08 | -19.30 | -29.12 | 16.27 | -20.95 | -28.04 | -21.55 | -21.97 | -43.30 | -43.51 | 1.47   | 0.45   | -7.13  | 3.64   | -10.26 | -4.04 |
| ΔN <sub>L</sub>       | 1.78  | 3.66  | -39.40 | -41.48 | -21.36 | -19.11 | -29.20 | 15.67 | -21.16 | -28.07 | -21.50 | -22.01 | -43.81 | -44.06 | 2.08   | 1.36   | -7.17  | 3.68   | -10.26 | -5.08 |
| rel. N <sub>L</sub>   | 1.88  | 3.68  | -39.57 | -41.30 | -21.01 | -19.28 | -29.12 | 16.27 | -20.95 | -28.04 | -21.38 | -21.92 | -43.29 | -43.50 | 1.48   | 0.49   | -7.13  | 3.64   | -10.25 | -4.03 |
| O <sub>LU</sub>       | -2.90 | -1.11 | 11.17  | 7.47   | 6.22   | 9.01   | -7.35  | 48.70 | -8.18  | -15.49 | -3.74  | -3.43  | 4.81   | 4.61   | -13.37 | -14.46 | 2.72   | 14.93  | 11.57  | 17.65 |
| O <sub>LB</sub>       | 0.54  | 2.45  | 5.72   | 4.14   | 4.89   | 4.22   | -2.36  | 63.75 | -2.55  | -14.35 | -11.25 | -12.91 | 0.59   | 4.46   | -6.71  | -8.39  | -2.72  | 11.38  | 9.14   | 12.67 |
| ΔO <sub>L</sub>       | -3.80 | -2.21 | 9.97   | 6.10   | 2.50   | 7.48   | -17.22 | 27.55 | -12.55 | -17.18 | -2.52  | -2.58  | 1.45   | -4.74  | -17.43 | -18.90 | -1.80  | 9.29   | 9.77   | 16.82 |
| rel. O <sub>L</sub>   | 3.59  | 6.18  | -39.62 | -25.59 | -13.50 | -23.27 | -5.57  | 59.43 | -4.89  | -19.41 | -20.58 | -27.04 | -21.91 | -9.64  | -2.52  | -3.33  | -11.86 | 0.42   | -2.92  | -1.54 |
| ΔT <sub>RL</sub>      | -1.66 | -0.07 | 13.35  | 9.87   | 13.39  | 16.88  | 11.30  | 63.37 | 5.67   | -4.14  | 0.30   | 2.18   | 3.39   | -1.36  | 15.24  | 13.20  | 34.39  | 44.29  | 0.15   | 5.04  |
| rel. T <sub>RL</sub>  | 1.40  | 3.28  | -57.41 | -56.23 | -32.81 | -32.42 | 0.02   | 67.58 | -16.95 | -19.11 | -24.89 | -25.78 | -34.94 | -12.46 | -6.31  | -4.22  | -28.82 | 1.96   | -14.44 | -7.77 |
| ΔH <sub>RL</sub>      | 2.02  | 3.62  | 12.07  | 7.70   | 9.24   | 14.35  | -6.27  | 27.89 | 11.80  | -2.33  | -13.10 | -14.57 | -21.45 | -29.04 | 19.41  | 12.23  | 29.68  | 36.05  | -11.93 | -8.73 |
| rel. H <sub>RL</sub>  | -0.09 | 2.17  | -51.61 | -57.41 | -40.25 | -53.70 | -18.27 | 54.21 | -31.62 | -23.43 | -16.59 | -13.72 | -45.36 | -23.84 | -25.55 | -10.30 | -51.97 | -7.93  | -16.13 | -5.95 |
| ΔA <sub>RL</sub>      | 5.87  | 7.71  | 5.39   | 3.17   | 8.11   | 10.06  | -8.34  | 38.08 | 7.74   | -3.39  | -20.82 | -19.57 | -36.14 | -45.75 | 20.74  | 18.71  | -35.14 | -27.10 | -17.24 | -5.95 |
| rel. A <sub>RL</sub>  | -1.81 | 1.18  | -60.47 | -54.72 | -52.97 | -44.53 | -29.34 | 23.93 | -20.98 | -27.30 | -15.96 | -16.64 | -35.54 | -31.55 | -15.18 | -19.53 | -29.15 | 0.84   | -16.91 | -5.26 |
| ΔD <sub>RL</sub>      | -0.89 | 1.67  | 1.26   | 1.89   | 0.13   | -2.03  | -25.15 | 16.84 | -27.60 | -27.30 | -20.19 | -18.61 | 4.49   | 4.68   | 1.77   | 6.52   | -5.43  | 17.34  | -6.71  | -3.18 |
| rel. D <sub>RL</sub>  | 2.28  | 3.68  | -62.27 | -69.77 | -70.96 | -50.59 | -0.30  | 42.12 | -11.89 | -24.52 | -16.67 | -21.46 | -55.96 | -64.08 | -20.44 | -25.46 | -14.16 | -29.15 | -11.64 | -9.39 |
| ΔA <sub>CRL</sub>     | 1.20  | 2.38  | -4.21  | -8.25  | -16.07 | -15.58 | -6.55  | 48.82 | -11.80 | -18.22 | -11.73 | -8.91  | -36.55 | -34.55 | -5.60  | -5.46  | -14.60 | -4.77  | -7.64  | -3.28 |
| rel. A <sub>CRL</sub> | 2.04  | 4.37  | -6.34  | -24.19 | -22.61 | -15.58 | -28.86 | 19.24 | -2.71  | -20.94 | -26.82 | -27.09 | -49.46 | -41.99 | -2.65  | -6.86  | -7.39  | 7.28   | -12.71 | -0.52 |
| ΔP <sub>RL</sub>      | 3.80  | 5.63  | -2.81  | -5.71  | -12.33 | -2.56  | -28.37 | 16.15 | -24.13 | -23.60 | -18.48 | -22.04 | -26.91 | -29.16 | -12.14 | 9.49   | -8.42  | -10.66 | -9.93  | -6.94 |
| rel. P <sub>RL</sub>  | 2.54  | 4.77  | -42.65 | -61.05 | -41.39 | -35.17 | -28.42 | 17.25 | -13.31 | -20.85 | -13.59 | -17.74 | -39.79 | -49.07 | -11.07 | -17.60 | -13.12 | -14.80 | -9.93  | -3.11 |
| ΔN <sub>RL</sub>      | 1.65  | 3.22  | 7.73   | -5.50  | 2.30   | 3.03   | -11.90 | 34.47 | -21.66 | -26.11 | -21.42 | -22.41 | -40.11 | -24.47 | 6.81   | 11.57  | -6.81  | 3.40   | -9.12  | -2.82 |
| rel. N <sub>RL</sub>  | 1.24  | 2.99  | -61.30 | -68.22 | -42.95 | -39.36 | -4.84  | 35.09 | -20.43 | -24.29 | -16.93 | -12.42 | -42.64 | -36.20 | 0.66   | -4.43  | -6.78  | 2.29   | -4.11  | -3.96 |
| ΔO <sub>RL</sub>      | -3.79 | -2.19 | 9.95   | 6.15   | 2.68   | 7.65   | -17.10 | 27.59 | -11.85 | -16.85 | -2.51  | -2.55  | 1.45   | -4.63  | -17.41 | -18.90 | -1.50  | 10.81  | 9.79   | 16.81 |
| rel. O <sub>RL</sub>  | 3.65  | 6.35  | -39.84 | -25.78 | -14.27 | -25.07 | -5.67  | 59.41 | -5.20  | -19.81 | -20.58 | -27.11 | -21.92 | -9.10  | -2.54  | -3.33  | -12.14 | -0.89  | -2.92  | -1.44 |

**Table S4.** The BEDROC values ( $\alpha = 20$ ) for the datasets screened using SASA descriptors. The best BEDROC score corresponding to each target protein (across columns) is indicated in bold and highlighted in green.

| SASA descriptor      | BAZ2B |       | BCL2  |       | BCLXL |       | BRD4-1       |       | CREBBP |              | HIV-IN |              | XIAP         |              | MCL1  |       | MDM2  |       | Menin |              |
|----------------------|-------|-------|-------|-------|-------|-------|--------------|-------|--------|--------------|--------|--------------|--------------|--------------|-------|-------|-------|-------|-------|--------------|
|                      | 4XUA  | 5E73  | 2O21  | 4LVT  | 3INQ  | 3WIZ  | 5D3L         | 5KU3  | 5EIC   | 5MMG         | 4CFD   | 4CHO         | 1TFT         | 5C3H         | 5FC4  | 5MES  | 4ODF  | 4ZFI  | 5DB2  | 6B41         |
| Surflex              | 0.120 | 0.120 | 0.641 | 0.701 | 0.523 | 0.500 | 0.672        | 0.254 | 0.100  | <b>0.160</b> | 0.604  | <b>0.639</b> | <b>0.767</b> | <b>0.704</b> | 0.170 | 0.150 | 0.842 | 0.600 | 0.104 | 0.065        |
| T <sub>RU</sub>      | 0.125 | 0.131 | 0.882 | 0.872 | 0.792 | 0.809 | 0.753        | 0.596 | 0.093  | 0.119        | 0.398  | 0.443        | 0.431        | 0.385        | 0.260 | 0.223 | 0.689 | 0.662 | 0.111 | 0.108        |
| T <sub>RB</sub>      | 0.123 | 0.132 | 0.640 | 0.582 | 0.543 | 0.592 | 0.766        | 0.479 | 0.076  | 0.117        | 0.450  | 0.530        | 0.300        | 0.288        | 0.128 | 0.143 | 0.498 | 0.579 | 0.084 | 0.076        |
| DT <sub>R</sub>      | 0.127 | 0.132 | 0.932 | 0.927 | 0.864 | 0.864 | 0.721        | 0.677 | 0.120  | 0.107        | 0.370  | 0.381        | 0.410        | 0.425        | 0.290 | 0.283 | 0.742 | 0.699 | 0.126 | 0.136        |
| rel. T <sub>R</sub>  | 0.133 | 0.142 | 0.002 | 0.003 | 0.006 | 0.006 | 0.385        | 0.143 | 0.031  | 0.051        | 0.327  | 0.302        | 0.016        | 0.012        | 0.039 | 0.048 | 0.095 | 0.246 | 0.047 | 0.049        |
| H <sub>RU</sub>      | 0.125 | 0.132 | 0.847 | 0.864 | 0.740 | 0.767 | 0.754        | 0.565 | 0.089  | 0.125        | 0.468  | 0.436        | 0.261        | 0.367        | 0.236 | 0.204 | 0.635 | 0.648 | 0.100 | 0.104        |
| H <sub>RB</sub>      | 0.123 | 0.132 | 0.450 | 0.368 | 0.466 | 0.536 | 0.593        | 0.434 | 0.072  | 0.125        | 0.504  | 0.475        | 0.156        | 0.259        | 0.104 | 0.139 | 0.315 | 0.535 | 0.078 | 0.091        |
| DH <sub>R</sub>      | 0.128 | 0.132 | 0.911 | 0.872 | 0.801 | 0.786 | 0.767        | 0.646 | 0.120  | 0.101        | 0.412  | 0.403        | 0.346        | 0.492        | 0.280 | 0.226 | 0.744 | 0.714 | 0.116 | 0.112        |
| rel. H <sub>R</sub>  | 0.125 | 0.132 | 0.004 | 0.006 | 0.026 | 0.009 | 0.135        | 0.166 | 0.035  | 0.047        | 0.323  | 0.307        | 0.002        | 0.019        | 0.043 | 0.063 | 0.071 | 0.299 | 0.052 | 0.067        |
| Ar <sub>RU</sub>     | 0.102 | 0.124 | 0.362 | 0.656 | 0.152 | 0.396 | 0.701        | 0.649 | 0.104  | 0.077        | 0.325  | 0.344        | 0.113        | 0.076        | 0.125 | 0.125 | 0.574 | 0.530 | 0.101 | 0.082        |
| Ar <sub>RB</sub>     | 0.124 | 0.128 | 0.042 | 0.049 | 0.010 | 0.189 | 0.346        | 0.334 | 0.093  | 0.080        | 0.332  | 0.364        | 0.072        | 0.013        | 0.092 | 0.085 | 0.378 | 0.350 | 0.066 | 0.076        |
| DAr <sub>R</sub>     | 0.132 | 0.134 | 0.677 | 0.759 | 0.588 | 0.453 | 0.752        | 0.727 | 0.071  | 0.076        | 0.362  | 0.354        | 0.156        | 0.178        | 0.199 | 0.171 | 0.671 | 0.613 | 0.093 | 0.084        |
| rel. Ar <sub>R</sub> | 0.125 | 0.137 | 0.006 | 0.008 | 0.005 | 0.028 | 0.089        | 0.108 | 0.054  | 0.046        | 0.377  | 0.274        | 0.013        | 0.004        | 0.042 | 0.038 | 0.174 | 0.180 | 0.064 | 0.058        |
| D <sub>RU</sub>      | 0.097 | 0.103 | 0.556 | 0.584 | 0.522 | 0.428 | <b>0.866</b> | 0.527 | 0.066  | 0.108        | 0.396  | 0.412        | 0.293        | 0.150        | 0.136 | 0.173 | 0.559 | 0.487 | 0.084 | 0.106        |
| D <sub>RB</sub>      | 0.145 | 0.140 | 0.356 | 0.072 | 0.044 | 0.108 | 0.849        | 0.531 | 0.065  | 0.070        | 0.366  | 0.431        | 0.160        | 0.091        | 0.068 | 0.089 | 0.479 | 0.363 | 0.066 | 0.050        |
| DD <sub>R</sub>      | 0.123 | 0.128 | 0.483 | 0.654 | 0.489 | 0.510 | 0.434        | 0.604 | 0.062  | 0.144        | 0.398  | 0.404        | 0.259        | 0.171        | 0.160 | 0.167 | 0.487 | 0.644 | 0.096 | <b>0.139</b> |
| rel. D <sub>R</sub>  | 0.147 | 0.142 | 0.006 | 0.003 | 0.003 | 0.005 | 0.697        | 0.542 | 0.046  | 0.032        | 0.357  | 0.413        | 0.035        | 0.021        | 0.029 | 0.026 | 0.159 | 0.095 | 0.052 | 0.051        |
| Ac <sub>RU</sub>     | 0.129 | 0.123 | 0.672 | 0.453 | 0.330 | 0.350 | 0.473        | 0.484 | 0.121  | 0.092        | 0.492  | 0.581        | 0.246        | 0.269        | 0.195 | 0.131 | 0.650 | 0.612 | 0.068 | 0.102        |
| Ac <sub>RB</sub>     | 0.130 | 0.125 | 0.563 | 0.276 | 0.249 | 0.128 | 0.478        | 0.470 | 0.103  | 0.077        | 0.516  | 0.444        | 0.039        | 0.143        | 0.153 | 0.102 | 0.612 | 0.579 | 0.064 | 0.068        |
| DAC <sub>R</sub>     | 0.137 | 0.136 | 0.721 | 0.426 | 0.393 | 0.471 | 0.405        | 0.476 | 0.121  | 0.110        | 0.403  | 0.499        | 0.279        | 0.207        | 0.212 | 0.173 | 0.480 | 0.518 | 0.067 | 0.105        |
| rel. Ac <sub>R</sub> | 0.145 | 0.138 | 0.180 | 0.027 | 0.023 | 0.021 | 0.368        | 0.327 | 0.065  | 0.050        | 0.287  | 0.297        | 0.006        | 0.044        | 0.046 | 0.043 | 0.436 | 0.402 | 0.059 | 0.063        |
| P <sub>RU</sub>      | 0.001 | 0.002 | 0.088 | 0.100 | 0.120 | 0.287 | 0.404        | 0.101 | 0.052  | 0.074        | 0.483  | 0.596        | 0.167        | 0.115        | 0.020 | 0.114 | 0.479 | 0.108 | 0.068 | 0.076        |
| P <sub>RB</sub>      | 0.001 | 0.002 | 0.070 | 0.080 | 0.101 | 0.256 | 0.400        | 0.101 | 0.058  | 0.083        | 0.412  | 0.595        | 0.177        | 0.059        | 0.092 | 0.114 | 0.536 | 0.108 | 0.054 | 0.078        |

|                      |       |       |       |       |       |       |       |       |       |       |       |       |       |       |       |       |       |       |       |       |
|----------------------|-------|-------|-------|-------|-------|-------|-------|-------|-------|-------|-------|-------|-------|-------|-------|-------|-------|-------|-------|-------|
| DP <sub>R</sub>      | 0.001 | 0.002 | 0.421 | 0.419 | 0.241 | 0.310 | 0.386 | 0.091 | 0.063 | 0.063 | 0.348 | 0.563 | 0.187 | 0.175 | 0.021 | 0.217 | 0.460 | 0.103 | 0.085 | 0.068 |
| rel. P <sub>R</sub>  | 0.001 | 0.002 | 0.022 | 0.010 | 0.008 | 0.035 | 0.391 | 0.101 | 0.088 | 0.068 | 0.446 | 0.569 | 0.067 | 0.008 | 0.078 | 0.041 | 0.316 | 0.104 | 0.060 | 0.078 |
| N <sub>RU</sub>      | 0.054 | 0.047 | 0.665 | 0.419 | 0.500 | 0.408 | 0.774 | 0.631 | 0.053 | 0.091 | 0.408 | 0.457 | 0.042 | 0.135 | 0.011 | 0.003 | 0.075 | 0.157 | 0.089 | 0.086 |
| N <sub>RB</sub>      | 0.060 | 0.054 | 0.297 | 0.268 | 0.367 | 0.354 | 0.824 | 0.624 | 0.057 | 0.094 | 0.487 | 0.494 | 0.089 | 0.156 | 0.056 | 0.069 | 0.075 | 0.154 | 0.078 | 0.071 |
| DN <sub>R</sub>      | 0.028 | 0.033 | 0.805 | 0.519 | 0.370 | 0.500 | 0.565 | 0.654 | 0.042 | 0.080 | 0.380 | 0.401 | 0.151 | 0.234 | 0.123 | 0.129 | 0.073 | 0.161 | 0.091 | 0.098 |
| rel. N <sub>R</sub>  | 0.055 | 0.043 | 0.007 | 0.007 | 0.015 | 0.017 | 0.384 | 0.545 | 0.056 | 0.073 | 0.410 | 0.455 | 0.038 | 0.026 | 0.056 | 0.068 | 0.075 | 0.147 | 0.071 | 0.061 |
| O <sub>RU</sub>      | 0.021 | 0.069 | 0.090 | 0.503 | 0.435 | 0.220 | 0.084 | 0.088 | 0.096 | 0.065 | 0.454 | 0.400 | 0.076 | 0.132 | 0.028 | 0.000 | 0.281 | 0.463 | 0.075 | 0.075 |
| O <sub>RB</sub>      | 0.131 | 0.132 | 0.074 | 0.112 | 0.082 | 0.046 | 0.108 | 0.125 | 0.091 | 0.048 | 0.407 | 0.342 | 0.072 | 0.143 | 0.080 | 0.000 | 0.355 | 0.420 | 0.054 | 0.067 |
| DO <sub>R</sub>      | 0.126 | 0.125 | 0.121 | 0.477 | 0.183 | 0.120 | 0.529 | 0.255 | 0.125 | 0.076 | 0.462 | 0.429 | 0.067 | 0.220 | 0.000 | 0.000 | 0.206 | 0.562 | 0.076 | 0.078 |
| rel. O <sub>R</sub>  | 0.130 | 0.138 | 0.039 | 0.037 | 0.025 | 0.004 | 0.108 | 0.125 | 0.036 | 0.047 | 0.401 | 0.342 | 0.000 | 0.018 | 0.084 | 0.000 | 0.274 | 0.166 | 0.051 | 0.066 |
| T <sub>LU</sub>      | 0.128 | 0.130 | 0.936 | 0.933 | 0.879 | 0.880 | 0.627 | 0.590 | 0.111 | 0.114 | 0.362 | 0.379 | 0.666 | 0.673 | 0.313 | 0.312 | 0.742 | 0.746 | 0.138 | 0.129 |
| T <sub>LB</sub>      | 0.138 | 0.140 | 0.899 | 0.897 | 0.846 | 0.820 | 0.589 | 0.612 | 0.113 | 0.095 | 0.352 | 0.377 | 0.506 | 0.633 | 0.299 | 0.288 | 0.624 | 0.700 | 0.107 | 0.109 |
| DT <sub>L</sub>      | 0.121 | 0.118 | 0.895 | 0.881 | 0.817 | 0.845 | 0.585 | 0.513 | 0.085 | 0.097 | 0.419 | 0.490 | 0.614 | 0.412 | 0.257 | 0.244 | 0.863 | 0.793 | 0.144 | 0.127 |
| rel. T <sub>L</sub>  | 0.141 | 0.144 | 0.193 | 0.238 | 0.386 | 0.279 | 0.539 | 0.673 | 0.090 | 0.058 | 0.354 | 0.400 | 0.298 | 0.403 | 0.173 | 0.155 | 0.422 | 0.556 | 0.072 | 0.078 |
| H <sub>LU</sub>      | 0.146 | 0.144 | 0.537 | 0.530 | 0.453 | 0.475 | 0.514 | 0.494 | 0.103 | 0.104 | 0.341 | 0.345 | 0.105 | 0.108 | 0.205 | 0.204 | 0.630 | 0.636 | 0.055 | 0.051 |
| H <sub>LB</sub>      | 0.137 | 0.144 | 0.515 | 0.367 | 0.427 | 0.448 | 0.593 | 0.766 | 0.114 | 0.131 | 0.454 | 0.460 | 0.223 | 0.249 | 0.192 | 0.194 | 0.488 | 0.705 | 0.048 | 0.052 |
| DH <sub>L</sub>      | 0.144 | 0.138 | 0.417 | 0.505 | 0.359 | 0.345 | 0.415 | 0.281 | 0.092 | 0.085 | 0.312 | 0.260 | 0.017 | 0.014 | 0.148 | 0.142 | 0.809 | 0.700 | 0.062 | 0.052 |
| rel. H <sub>L</sub>  | 0.128 | 0.134 | 0.193 | 0.112 | 0.188 | 0.128 | 0.691 | 0.848 | 0.069 | 0.090 | 0.615 | 0.615 | 0.203 | 0.312 | 0.075 | 0.077 | 0.385 | 0.573 | 0.060 | 0.064 |
| Ar <sub>LU</sub>     | 0.154 | 0.152 | 0.332 | 0.303 | 0.556 | 0.602 | 0.406 | 0.375 | 0.143 | 0.139 | 0.428 | 0.429 | 0.109 | 0.121 | 0.274 | 0.268 | 0.082 | 0.083 | 0.039 | 0.040 |
| Ar <sub>LB</sub>     | 0.145 | 0.146 | 0.363 | 0.305 | 0.535 | 0.506 | 0.480 | 0.532 | 0.100 | 0.098 | 0.392 | 0.440 | 0.244 | 0.307 | 0.246 | 0.230 | 0.163 | 0.177 | 0.040 | 0.042 |
| DAr <sub>L</sub>     | 0.159 | 0.155 | 0.273 | 0.248 | 0.361 | 0.462 | 0.301 | 0.253 | 0.149 | 0.135 | 0.367 | 0.329 | 0.023 | 0.010 | 0.216 | 0.207 | 0.090 | 0.073 | 0.046 | 0.045 |
| rel. Ar <sub>L</sub> | 0.128 | 0.134 | 0.144 | 0.085 | 0.170 | 0.103 | 0.424 | 0.588 | 0.035 | 0.045 | 0.464 | 0.457 | 0.206 | 0.282 | 0.066 | 0.063 | 0.422 | 0.555 | 0.068 | 0.070 |
| D <sub>LU</sub>      | 0.157 | 0.159 | 0.134 | 0.135 | 0.105 | 0.109 | 0.475 | 0.498 | 0.038 | 0.039 | 0.365 | 0.375 | 0.322 | 0.312 | 0.085 | 0.086 | 0.506 | 0.484 | 0.054 | 0.055 |
| D <sub>LB</sub>      | 0.146 | 0.137 | 0.184 | 0.225 | 0.153 | 0.153 | 0.554 | 0.697 | 0.047 | 0.050 | 0.373 | 0.360 | 0.201 | 0.160 | 0.105 | 0.111 | 0.554 | 0.508 | 0.058 | 0.066 |
| DD <sub>L</sub>      | 0.150 | 0.154 | 0.117 | 0.104 | 0.092 | 0.095 | 0.452 | 0.413 | 0.039 | 0.041 | 0.314 | 0.333 | 0.327 | 0.339 | 0.080 | 0.078 | 0.434 | 0.461 | 0.054 | 0.055 |
| rel. D <sub>L</sub>  | 0.124 | 0.121 | 0.107 | 0.120 | 0.145 | 0.094 | 0.506 | 0.612 | 0.059 | 0.061 | 0.392 | 0.388 | 0.024 | 0.011 | 0.085 | 0.088 | 0.302 | 0.286 | 0.070 | 0.071 |
| Ac <sub>LU</sub>     | 0.159 | 0.158 | 0.581 | 0.569 | 0.387 | 0.408 | 0.621 | 0.645 | 0.035 | 0.036 | 0.445 | 0.445 | 0.077 | 0.086 | 0.191 | 0.191 | 0.500 | 0.505 | 0.032 | 0.030 |
| Ac <sub>LB</sub>     | 0.132 | 0.139 | 0.635 | 0.591 | 0.402 | 0.466 | 0.533 | 0.615 | 0.072 | 0.047 | 0.470 | 0.430 | 0.130 | 0.136 | 0.193 | 0.176 | 0.539 | 0.624 | 0.048 | 0.053 |
| DAc <sub>L</sub>     | 0.162 | 0.156 | 0.289 | 0.272 | 0.218 | 0.198 | 0.619 | 0.511 | 0.032 | 0.039 | 0.454 | 0.510 | 0.029 | 0.026 | 0.133 | 0.121 | 0.412 | 0.332 | 0.036 | 0.028 |
| rel. Ac <sub>L</sub> | 0.137 | 0.138 | 0.218 | 0.153 | 0.135 | 0.172 | 0.337 | 0.401 | 0.079 | 0.052 | 0.419 | 0.481 | 0.059 | 0.049 | 0.098 | 0.077 | 0.393 | 0.410 | 0.061 | 0.054 |

|                       |       |       |       |       |       |       |       |       |       |       |       |       |       |       |       |       |       |       |       |       |
|-----------------------|-------|-------|-------|-------|-------|-------|-------|-------|-------|-------|-------|-------|-------|-------|-------|-------|-------|-------|-------|-------|
| P <sub>LU</sub>       | 0.112 | 0.112 | 0.210 | 0.212 | 0.168 | 0.151 | 0.140 | 0.139 | 0.035 | 0.035 | 0.226 | 0.228 | 0.085 | 0.103 | 0.091 | 0.091 | 0.298 | 0.277 | 0.043 | 0.045 |
| P <sub>LB</sub>       | 0.061 | 0.074 | 0.162 | 0.152 | 0.110 | 0.142 | 0.076 | 0.098 | 0.040 | 0.039 | 0.260 | 0.302 | 0.032 | 0.025 | 0.079 | 0.090 | 0.296 | 0.162 | 0.044 | 0.054 |
| DP <sub>L</sub>       | 0.107 | 0.106 | 0.162 | 0.178 | 0.151 | 0.104 | 0.142 | 0.138 | 0.034 | 0.034 | 0.233 | 0.228 | 0.096 | 0.118 | 0.077 | 0.059 | 0.220 | 0.283 | 0.046 | 0.044 |
| rel. P <sub>L</sub>   | 0.063 | 0.076 | 0.254 | 0.210 | 0.132 | 0.161 | 0.076 | 0.098 | 0.040 | 0.039 | 0.260 | 0.294 | 0.033 | 0.024 | 0.088 | 0.092 | 0.348 | 0.150 | 0.042 | 0.055 |
| N <sub>LU</sub>       | 0.074 | 0.074 | 0.072 | 0.071 | 0.261 | 0.264 | 0.104 | 0.104 | 0.027 | 0.027 | 0.373 | 0.445 | 0.034 | 0.033 | 0.192 | 0.184 | 0.716 | 0.714 | 0.050 | 0.049 |
| N <sub>LB</sub>       | 0.069 | 0.068 | 0.076 | 0.078 | 0.292 | 0.282 | 0.105 | 0.106 | 0.027 | 0.025 | 0.343 | 0.405 | 0.051 | 0.044 | 0.189 | 0.184 | 0.711 | 0.705 | 0.051 | 0.060 |
| DN <sub>L</sub>       | 0.072 | 0.072 | 0.074 | 0.071 | 0.271 | 0.284 | 0.099 | 0.101 | 0.024 | 0.024 | 0.431 | 0.435 | 0.025 | 0.030 | 0.196 | 0.201 | 0.709 | 0.694 | 0.051 | 0.046 |
| rel. N <sub>L</sub>   | 0.069 | 0.068 | 0.078 | 0.079 | 0.300 | 0.283 | 0.105 | 0.106 | 0.027 | 0.026 | 0.393 | 0.445 | 0.053 | 0.046 | 0.190 | 0.188 | 0.710 | 0.705 | 0.051 | 0.061 |
| O <sub>LU</sub>       | 0.114 | 0.115 | 0.878 | 0.873 | 0.706 | 0.710 | 0.475 | 0.453 | 0.076 | 0.080 | 0.377 | 0.381 | 0.612 | 0.614 | 0.157 | 0.157 | 0.519 | 0.521 | 0.136 | 0.133 |
| O <sub>LB</sub>       | 0.134 | 0.129 | 0.668 | 0.741 | 0.649 | 0.599 | 0.573 | 0.548 | 0.096 | 0.075 | 0.381 | 0.402 | 0.522 | 0.620 | 0.168 | 0.166 | 0.590 | 0.581 | 0.127 | 0.122 |
| DO <sub>L</sub>       | 0.108 | 0.113 | 0.823 | 0.805 | 0.569 | 0.619 | 0.392 | 0.403 | 0.057 | 0.072 | 0.313 | 0.310 | 0.484 | 0.368 | 0.106 | 0.117 | 0.422 | 0.462 | 0.131 | 0.129 |
| rel. O <sub>L</sub>   | 0.146 | 0.149 | 0.085 | 0.123 | 0.216 | 0.138 | 0.505 | 0.575 | 0.089 | 0.060 | 0.372 | 0.395 | 0.210 | 0.249 | 0.130 | 0.128 | 0.510 | 0.517 | 0.068 | 0.069 |
| DT <sub>RL</sub>      | 0.121 | 0.123 | 0.918 | 0.911 | 0.853 | 0.862 | 0.643 | 0.578 | 0.106 | 0.108 | 0.391 | 0.426 | 0.563 | 0.438 | 0.282 | 0.274 | 0.813 | 0.753 | 0.140 | 0.133 |
| rel. T <sub>RL</sub>  | 0.141 | 0.144 | 0.028 | 0.040 | 0.129 | 0.095 | 0.466 | 0.591 | 0.059 | 0.042 | 0.364 | 0.414 | 0.185 | 0.294 | 0.085 | 0.098 | 0.296 | 0.471 | 0.051 | 0.055 |
| DH <sub>RL</sub>      | 0.142 | 0.139 | 0.848 | 0.813 | 0.684 | 0.741 | 0.675 | 0.468 | 0.137 | 0.113 | 0.412 | 0.340 | 0.124 | 0.149 | 0.271 | 0.224 | 0.896 | 0.813 | 0.099 | 0.085 |
| rel. H <sub>RL</sub>  | 0.131 | 0.137 | 0.015 | 0.020 | 0.060 | 0.016 | 0.395 | 0.601 | 0.036 | 0.050 | 0.543 | 0.608 | 0.042 | 0.144 | 0.041 | 0.079 | 0.131 | 0.468 | 0.053 | 0.057 |
| DAr <sub>RL</sub>     | 0.157 | 0.153 | 0.518 | 0.562 | 0.630 | 0.604 | 0.550 | 0.423 | 0.151 | 0.132 | 0.358 | 0.348 | 0.091 | 0.047 | 0.245 | 0.227 | 0.142 | 0.186 | 0.053 | 0.057 |
| rel. Ar <sub>RL</sub> | 0.127 | 0.132 | 0.017 | 0.034 | 0.038 | 0.059 | 0.289 | 0.390 | 0.028 | 0.027 | 0.445 | 0.403 | 0.090 | 0.082 | 0.044 | 0.033 | 0.280 | 0.384 | 0.064 | 0.070 |
| DD <sub>RL</sub>      | 0.150 | 0.155 | 0.395 | 0.506 | 0.380 | 0.236 | 0.445 | 0.420 | 0.042 | 0.027 | 0.345 | 0.360 | 0.434 | 0.454 | 0.109 | 0.122 | 0.478 | 0.575 | 0.061 | 0.076 |
| rel. D <sub>RL</sub>  | 0.142 | 0.138 | 0.009 | 0.003 | 0.005 | 0.014 | 0.643 | 0.644 | 0.068 | 0.047 | 0.382 | 0.403 | 0.005 | 0.008 | 0.037 | 0.031 | 0.259 | 0.167 | 0.054 | 0.056 |
| DAC <sub>RL</sub>     | 0.161 | 0.156 | 0.441 | 0.421 | 0.325 | 0.248 | 0.588 | 0.534 | 0.043 | 0.047 | 0.450 | 0.524 | 0.055 | 0.063 | 0.139 | 0.139 | 0.432 | 0.376 | 0.038 | 0.036 |
| rel. AC <sub>RL</sub> | 0.133 | 0.138 | 0.287 | 0.125 | 0.094 | 0.248 | 0.380 | 0.465 | 0.071 | 0.040 | 0.416 | 0.471 | 0.061 | 0.064 | 0.097 | 0.077 | 0.489 | 0.444 | 0.069 | 0.061 |
| DP <sub>RL</sub>      | 0.108 | 0.107 | 0.423 | 0.420 | 0.251 | 0.310 | 0.401 | 0.154 | 0.062 | 0.063 | 0.342 | 0.463 | 0.188 | 0.176 | 0.070 | 0.218 | 0.461 | 0.321 | 0.083 | 0.045 |
| rel. P <sub>RL</sub>  | 0.063 | 0.077 | 0.022 | 0.012 | 0.008 | 0.034 | 0.388 | 0.126 | 0.092 | 0.068 | 0.443 | 0.502 | 0.067 | 0.008 | 0.076 | 0.040 | 0.303 | 0.173 | 0.060 | 0.070 |
| DN <sub>RL</sub>      | 0.084 | 0.087 | 0.673 | 0.384 | 0.467 | 0.479 | 0.476 | 0.546 | 0.025 | 0.035 | 0.422 | 0.418 | 0.091 | 0.160 | 0.230 | 0.242 | 0.719 | 0.713 | 0.065 | 0.063 |
| rel. N <sub>RL</sub>  | 0.069 | 0.051 | 0.006 | 0.005 | 0.006 | 0.012 | 0.388 | 0.551 | 0.055 | 0.073 | 0.422 | 0.479 | 0.041 | 0.031 | 0.077 | 0.066 | 0.709 | 0.581 | 0.071 | 0.065 |
| DO <sub>RL</sub>      | 0.108 | 0.113 | 0.822 | 0.807 | 0.577 | 0.619 | 0.393 | 0.403 | 0.059 | 0.072 | 0.313 | 0.310 | 0.484 | 0.382 | 0.106 | 0.117 | 0.426 | 0.475 | 0.132 | 0.129 |
| rel. O <sub>RL</sub>  | 0.146 | 0.148 | 0.084 | 0.121 | 0.210 | 0.127 | 0.504 | 0.576 | 0.087 | 0.058 | 0.372 | 0.396 | 0.210 | 0.254 | 0.130 | 0.128 | 0.505 | 0.501 | 0.068 | 0.070 |



**Table S5.** Enrichment Factors at 1% subsetting for protein structures of ten PPI targets obtained using post docking derivatized SASA descriptors.

The best enrichment score corresponding to each target protein (across columns) is shown in bold and highlighted in green.

| SASA descriptor      | BAZ2B |       | BCL2      |           | BCLXL     |      | BRD4-1     |      | CREBBP |            | HIV-IN |      | XIAP      |           | MCL1 |      | MDM2     |      | Menin |            |
|----------------------|-------|-------|-----------|-----------|-----------|------|------------|------|--------|------------|--------|------|-----------|-----------|------|------|----------|------|-------|------------|
|                      | 4XUA  | 5E73  | 2021      | 4LVT      | 3INQ      | 3WIZ | 5D3L       | 5KU3 | 5EIC   | 5MMG       | 4CFD   | 4CHO | 1TFT      | 5C3H      | 5FC4 | 5MES | 4ODF     | 4ZFI | 5DB2  | 6B41       |
| Surflex              | 0.77  | 0.86  | 25        | <b>28</b> | 26        | 27   | 0.96       | 0.72 | 1.8    | <b>5.1</b> | 1.4    | 1.5  | <b>42</b> | <b>33</b> | 6.1  | 3.3  | <b>3</b> | 2.5  | 3.4   | 1          |
| T <sub>RU</sub>      | 0.96  | 1.2   | <b>28</b> | 27        | 44        | 45   | 1.8        | 1.6  | 1.4    | 1.5        | 1.5    | 1.6  | 16        | 16        | 11   | 8.9  | 2.5      | 2.6  | 3.3   | 3.3        |
| T <sub>RB</sub>      | 0.98  | 1.2   | 23        | 18        | 29        | 28   | <b>1.9</b> | 0.96 | 1.3    | 1.4        | 0.91   | 1.3  | 7.8       | 9.1       | 4    | 4.4  | 1.8      | 2.3  | 3     | 2          |
| ΔT <sub>R</sub>      | 1.1   | 1.1   | <b>28</b> | 27        | <b>47</b> | 46   | 1.3        | 1.6  | 1.5    | 1.4        | 1.7    | 1.3  | 19        | 20        | 16   | 14   | 2.5      | 2.6  | 3.1   | 4.1        |
| rel. T <sub>R</sub>  | 1.1   | 1.3   | 0         | 0.057     | 0         | 0.1  | 0.48       | 0.12 | 0.15   | 0.077      | 0.57   | 0.46 | 0.18      | 0         | 0.91 | 0.63 | 0.13     | 0.36 | 0.71  | 0.85       |
| H <sub>RU</sub>      | 0.96  | 1.1   | 27        | 27        | 41        | 41   | 1.7        | 1.4  | 1.2    | 1.7        | 1.4    | 1.5  | 9.1       | 13        | 11   | 7    | 2.5      | 2.4  | 3     | 3          |
| H <sub>RB</sub>      | 0.93  | 1.1   | 16        | 11        | 19        | 22   | 1.1        | 0.6  | 1      | 2.1        | 1.4    | 0.91 | 2.9       | 7.8       | 2.4  | 3.9  | 0.89     | 1.7  | 1.8   | 2.8        |
| ΔH <sub>R</sub>      | 1.2   | 1.1   | <b>28</b> | 27        | 44        | 45   | 1.7        | 1.4  | 1.5    | 1.2        | 1.7    | 1.4  | 15        | 19        | 14   | 8.9  | 2.5      | 2.7  | 2.8   | 3.3        |
| rel. H <sub>R</sub>  | 0.92  | 0.99  | 0         | 0.11      | 0.42      | 0.1  | 0          | 0.12 | 0.54   | 0.15       | 0.69   | 0.34 | 0         | 0.088     | 0.77 | 1.4  | 0        | 0.94 | 0.71  | 1          |
| Ar <sub>RU</sub>     | 0.86  | 0.93  | 11        | 22        | 6.7       | 26   | 1.2        | 1.6  | 1.6    | 0.77       | 0.57   | 1.1  | 2.6       | 4.4       | 4.6  | 1.4  | 2.3      | 1.8  | 1.8   | 1.8        |
| Ar <sub>RB</sub>     | 0.9   | 1     | 0.28      | 0.62      | 0.1       | 6.9  | 0.12       | 0.6  | 1.5    | 0.62       | 0.46   | 1    | 2.1       | 0.35      | 3.1  | 1.3  | 1.1      | 0.54 | 0.71  | 1.7        |
| ΔAr <sub>R</sub>     | 0.99  | 1.1   | 22        | 26        | 27        | 22   | 1.7        | 1.2  | 0.62   | 1.4        | 1      | 1.4  | 6.7       | 8.3       | 7.7  | 5.1  | 2.4      | 2.5  | 2.3   | 2.3        |
| rel. Ar <sub>R</sub> | 0.92  | 1.1   | 0.057     | 0.057     | 0.1       | 0.42 | 0          | 0.12 | 0.23   | 0.46       | 0.34   | 0.57 | 0.18      | 0         | 0.77 | 0.35 | 0.13     | 0.22 | 0.43  | 0.85       |
| D <sub>RU</sub>      | 1     | 1.1   | 20        | 19        | 23        | 22   | 1.8        | 0.96 | 1.3    | 1.7        | 1      | 1.6  | 7.6       | 4.1       | 5.6  | 6    | 2        | 1.9  | 2.1   | 2.4        |
| D <sub>RB</sub>      | 1.2   | 1.2   | 13        | 1.8       | 1.2       | 5.3  | 1.6        | 1.1  | 1.2    | 0.92       | 0.23   | 1.4  | 1.1       | 3.2       | 1.3  | 1.7  | 1.4      | 0.98 | 0.71  | 1.3        |
| ΔD <sub>R</sub>      | 0.88  | 0.99  | 14        | 22        | 21        | 22   | 1.1        | 1.3  | 1.1    | 2.5        | 1.3    | 1.4  | 11        | 6.3       | 5.6  | 5.1  | 2.4      | 2.5  | 2.8   | <b>4.6</b> |
| rel. D <sub>R</sub>  | 1.2   | 1.2   | 0.057     | 0         | 0.1       | 0    | 1.3        | 1.1  | 0.69   | 0.23       | 0.57   | 0.46 | 0.18      | 0.088     | 0.21 | 0    | 0.22     | 0.18 | 1.3   | 1.6        |
| Ac <sub>RU</sub>     | 0.88  | 0.79  | 25        | 22        | 23        | 7.4  | 1.2        | 0.84 | 1.6    | 1.1        | 1.1    | 1.4  | 7.7       | 11        | 7.8  | 4.3  | 2.1      | 2.5  | 1.8   | 3.1        |
| Ac <sub>RB</sub>     | 0.9   | 0.77  | 21        | 11        | 14        | 4.1  | 1.4        | 0.84 | 1.4    | 0.77       | 1.4    | 0.69 | 2.6       | 5         | 5.1  | 2.6  | 2.1      | 2.1  | 1.3   | 1.7        |
| ΔAc <sub>R</sub>     | 0.83  | 1     | 26        | 14        | 20        | 21   | 0.84       | 1.1  | 1.9    | 1.8        | 1.4    | 1    | 8.6       | 7.2       | 7.5  | 6.4  | 2.2      | 2.3  | 1.7   | 3.8        |
| rel. Ac <sub>R</sub> | 1.3   | 1.2   | 2         | 0.057     | 0         | 0.1  | 0.12       | 0.6  | 0.62   | 0.38       | 0.11   | 0.8  | 0.088     | 0.79      | 0.14 | 0.56 | 0.63     | 0.98 | 0.71  | 1          |
| P <sub>RU</sub>      | 0.044 | 0.073 | 5.7       | 5.9       | 6.8       | 20   | 0.72       | 0.48 | 1.1    | 0.69       | 1.4    | 1.7  | 3.4       | 2.1       | 1.5  | 0.14 | 1.6      | 1.6  | 2     | 1          |
| P <sub>RB</sub>      | 0.044 | 0.073 | 2         | 0.62      | 4.5       | 12   | 0.6        | 0.48 | 1.1    | 0.92       | 1.1    | 1.6  | 3.8       | 0.88      | 2.3  | 1.2  | 2.1      | 1.4  | 1     | 1.1        |

|               |       |       |       |       |      |      |      |      |      |      |      |      |       |       |      |      |       |       |      |      |
|---------------|-------|-------|-------|-------|------|------|------|------|------|------|------|------|-------|-------|------|------|-------|-------|------|------|
| $\Delta P_R$  | 0.029 | 0.073 | 13    | 13    | 10   | 12   | 1.2  | 0.36 | 0.85 | 1.3  | 1.4  | 1.6  | 11    | 6.3   | 1.2  | 7.5  | 2.2   | 1.6   | 2.1  | 1.1  |
| rel. $P_R$    | 0.044 | 0.073 | 0.057 | 0.23  | 0    | 0    | 0.84 | 0.48 | 0.54 | 1    | 1.1  | 1.4  | 0.18  | 0     | 1.3  | 0    | 0.8   | 1.1   | 0.57 | 1.4  |
| $N_{RU}$      | 0.54  | 0.77  | 15    | 9.3   | 19   | 19   | 1.7  | 0.84 | 0.77 | 1.1  | 1.1  | 1.3  | 3.4   | 7.1   | 0    | 0.21 | 1.2   | 1.3   | 2.4  | 2.8  |
| $N_{RB}$      | 0.54  | 0.77  | 3.8   | 3.4   | 13   | 15   | 1.7  | 0.96 | 0.77 | 1.8  | 0.69 | 1.4  | 4.6   | 4.9   | 0.84 | 0.77 | 1.2   | 1.1   | 2.3  | 1.3  |
| $\Delta N_R$  | 0.95  | 0.67  | 28    | 18    | 20   | 25   | 1.1  | 1.3  | 0.62 | 1.6  | 1.6  | 0.8  | 8     | 9.8   | 3.6  | 2.7  | 1.1   | 1.4   | 2.1  | 3.3  |
| rel. $N_R$    | 0     | 0     | 0     | 0.17  | 0.21 | 0    | 0    | 0.72 | 0.46 | 0.54 | 0.91 | 0.69 | 0.62  | 0     | 0.84 | 0.63 | 1.2   | 0.72  | 1    | 1.3  |
| $O_{RU}$      | 0     | 0.015 | 6.6   | 25    | 22   | 1.9  | 0.12 | 0.12 | 1.2  | 1.2  | 1.3  | 0.8  | 4.9   | 2.5   | 0    | 0    | 0.67  | 1.7   | 1.7  | 1.6  |
| $O_{RB}$      | 0.8   | 0.98  | 2.8   | 2.3   | 1.9  | 1.8  | 0.24 | 0.12 | 0.77 | 0.31 | 1    | 1    | 4.5   | 0.79  | 0.99 | 0    | 0.8   | 1.4   | 1.7  | 1.3  |
| $\Delta O_R$  | 0.86  | 0.88  | 2.8   | 21    | 4.9  | 3.6  | 0.36 | 0.24 | 2.2  | 0.85 | 1.3  | 0.8  | 3.4   | 7.4   | 0    | 0    | 1.5   | 2.6   | 2.1  | 1.3  |
| rel. $O_R$    | 0.77  | 0.99  | 0     | 0     | 0    | 0    | 0.24 | 0.12 | 0.46 | 0.38 | 0.8  | 0.91 | 0     | 0     | 1.9  | 0    | 0     | 0.045 | 1    | 1    |
| $T_{LU}$      | 1.1   | 1.1   | 27    | 27    | 46   | 46   | 1.1  | 0.96 | 1.9  | 1.9  | 2.4  | 2.4  | 29    | 30    | 17   | 17   | 2.6   | 2.6   | 4.8  | 3.7  |
| $T_{LB}$      | 1.2   | 1.3   | 27    | 27    | 45   | 46   | 0.84 | 1.1  | 1.8  | 1.2  | 2.4  | 2.4  | 25    | 29    | 14   | 13   | 2.6   | 2.6   | 2.7  | 2.8  |
| $\Delta T_L$  | 1     | 0.88  | 27    | 28    | 46   | 47   | 1.2  | 0.84 | 0.85 | 1.8  | 1.5  | 1.1  | 25    | 18    | 13   | 10   | 2.7   | 2.7   | 5    | 3.8  |
| rel. $T_L$    | 1.2   | 1.1   | 5.3   | 4.5   | 15   | 12   | 1.2  | 1.6  | 1.6  | 0.85 | 2.3  | 2.3  | 17    | 19    | 4.6  | 3.1  | 2.4   | 2.6   | 1.7  | 1.3  |
| $H_{LU}$      | 1.1   | 1.1   | 17    | 17    | 23   | 25   | 1.1  | 1.1  | 1.5  | 1.2  | 1.9  | 2.1  | 2.7   | 3.2   | 6.6  | 6.2  | 1.5   | 1.6   | 0.85 | 0.71 |
| $H_{LB}$      | 1     | 0.98  | 17    | 13    | 20   | 23   | 1.4  | 1.7  | 1.5  | 2.5  | 2.1  | 2.2  | 10    | 10    | 6.8  | 6.6  | 2.1   | 2.5   | 1    | 0.85 |
| $\Delta H_L$  | 0.99  | 1     | 14    | 16    | 15   | 14   | 0.72 | 0.6  | 1    | 0.62 | 0.23 | 0    | 0.088 | 0     | 2.9  | 3.9  | 2.3   | 1.9   | 0.43 | 0.85 |
| rel. $H_L$    | 0.8   | 0.9   | 3.6   | 2.1   | 4.7  | 3.1  | 1.9  | 2.2  | 0.77 | 2.5  | 1.9  | 1.9  | 4.9   | 11    | 0.7  | 0.99 | 1.7   | 2.1   | 1.4  | 0.43 |
| $Ar_{LU}$     | 1.2   | 1.2   | 9     | 8.5   | 24   | 25   | 0.72 | 0.6  | 3.2  | 3.5  | 1.7  | 1.6  | 4     | 4.1   | 9.6  | 9.1  | 0.13  | 0.22  | 1    | 1    |
| $Ar_{LB}$     | 1.2   | 1.2   | 11    | 8.7   | 28   | 23   | 0.6  | 1.2  | 1.4  | 1.8  | 2.2  | 2.2  | 11    | 14    | 7.6  | 6.8  | 0.85  | 1     | 0.43 | 0.28 |
| $\Delta Ar_L$ | 1.4   | 1.3   | 8.8   | 7.5   | 14   | 24   | 0.36 | 0.24 | 3    | 2.4  | 1.1  | 0.8  | 0.18  | 0.26  | 5.5  | 7.2  | 0.18  | 0.13  | 0.71 | 0.71 |
| rel. $Ar_L$   | 0.93  | 1.1   | 2.8   | 0.45  | 3.6  | 1.5  | 0.6  | 1.2  | 0.54 | 0.46 | 0.8  | 1.5  | 5.6   | 6.3   | 0.56 | 0.63 | 1.7   | 2.1   | 1.6  | 1.3  |
| $D_{LU}$      | 1.8   | 1.8   | 1.5   | 1.6   | 4.4  | 4.4  | 0.84 | 0.84 | 0.54 | 0.62 | 1.7  | 1.8  | 7.1   | 6.9   | 1.6  | 1.6  | 2.5   | 2.6   | 1.6  | 1.7  |
| $D_{LB}$      | 1.4   | 1.2   | 2.9   | 4     | 5    | 5    | 1.3  | 1.4  | 0.38 | 0.92 | 1.8  | 2.1  | 6.4   | 4.8   | 1.2  | 1.8  | 2.5   | 2.5   | 1.1  | 1.4  |
| $\Delta D_L$  | 1.4   | 1.4   | 1.1   | 1.5   | 4.4  | 4.3  | 0.6  | 0.84 | 0.46 | 0.54 | 0.57 | 0.57 | 5.8   | 5.6   | 0.84 | 0.99 | 1.9   | 2.1   | 1.6  | 1.7  |
| rel. $D_L$    | 1.1   | 0.12  | 0     | 0.057 | 0.1  | 0    | 1.3  | 1.2  | 0.77 | 1.2  | 0.57 | 0.8  | 0.18  | 0.088 | 0.14 | 0    | 0.045 | 0.089 | 1.3  | 1.3  |
| $Ac_{LU}$     | 1.7   | 1.5   | 15    | 15    | 14   | 16   | 1.4  | 1.6  | 0.31 | 0.38 | 2.4  | 2.4  | 1.9   | 2.4   | 6.8  | 7.7  | 2.1   | 2     | 0.43 | 0.28 |
| $Ac_{LB}$     | 0.99  | 0.96  | 22    | 21    | 20   | 24   | 1.6  | 1.6  | 0.69 | 0.54 | 2.4  | 2.4  | 4.8   | 5.2   | 7.2  | 6.1  | 2.3   | 2.4   | 0.85 | 0.71 |
| $\Delta Ac_L$ | 1.8   | 1.6   | 7     | 6.6   | 6.7  | 5.5  | 1.6  | 0.96 | 0.38 | 0.38 | 2.1  | 2.2  | 0.26  | 0.44  | 3.8  | 3.9  | 0.94  | 0.94  | 0.71 | 0.28 |
| rel. $Ac_L$   | 1.2   | 1.2   | 1.5   | 0.68  | 1.1  | 0.83 | 0.24 | 0.84 | 0.62 | 0.69 | 0.91 | 1.3  | 0.088 | 0     | 1.6  | 1.5  | 0.98  | 1.2   | 1.4  | 0.28 |

|                       |      |      |       |       |      |      |      |      |      |       |      |      |       |      |      |      |      |      |      |      |
|-----------------------|------|------|-------|-------|------|------|------|------|------|-------|------|------|-------|------|------|------|------|------|------|------|
| P <sub>LU</sub>       | 1    | 1    | 0.68  | 0.62  | 3.9  | 4.2  | 0.96 | 0.84 | 0.38 | 0.38  | 0.34 | 0.46 | 0.88  | 0.71 | 1.5  | 1.5  | 1.4  | 1.2  | 0.71 | 0.57 |
| P <sub>LB</sub>       | 1.1  | 0.92 | 0.51  | 0.85  | 4.5  | 4.7  | 0.24 | 0.48 | 0.46 | 0.38  | 0.34 | 0.69 | 0.71  | 0.88 | 1.9  | 1.8  | 1.3  | 0.76 | 0.57 | 0.43 |
| ΔP <sub>L</sub>       | 0.98 | 1.1  | 1.3   | 1.1   | 3.2  | 3.2  | 0.96 | 0.84 | 0.23 | 0.23  | 0.46 | 0.46 | 0.97  | 0.53 | 1.7  | 1.7  | 0.98 | 1.3  | 0.57 | 0.71 |
| rel. P <sub>L</sub>   | 1.3  | 1.4  | 0     | 0     | 0    | 0    | 0.24 | 0.48 | 0.46 | 0.38  | 0.34 | 0.46 | 0     | 0.44 | 0    | 0    | 0    | 0    | 0.28 | 1    |
| N <sub>LU</sub>       | 1.2  | 1.2  | 1.6   | 1.7   | 6.4  | 6.9  | 0.6  | 0.48 | 0.15 | 0.23  | 0.8  | 0.91 | 0.53  | 0.35 | 4.1  | 3.7  | 2.7  | 2.8  | 0.85 | 0.57 |
| N <sub>LB</sub>       | 1    | 1    | 3.2   | 2.3   | 8.4  | 7.6  | 0.6  | 0.48 | 0.46 | 0.23  | 0.34 | 0.57 | 3.5   | 1.6  | 4.8  | 4.3  | 2.7  | 3    | 0.85 | 1.3  |
| ΔN <sub>L</sub>       | 1.3  | 1.1  | 2.6   | 1.4   | 6.3  | 6.3  | 0.36 | 0.36 | 0.23 | 0.31  | 0.91 | 0.91 | 0.088 | 0.35 | 3.6  | 5.9  | 2.6  | 2.7  | 0.57 | 0.43 |
| rel. N <sub>L</sub>   | 0.99 | 0.99 | 3.5   | 2.7   | 11   | 6.4  | 0.6  | 0.48 | 0.54 | 0.31  | 1.7  | 2.3  | 4.3   | 2.4  | 5    | 5.1  | 2.7  | 2.9  | 0.85 | 1.4  |
| O <sub>LU</sub>       | 0.9  | 1.1  | 26    | 26    | 40   | 40   | 0.72 | 0.72 | 1.8  | 2     | 1.7  | 0.91 | 26    | 26   | 7.2  | 7.2  | 2.4  | 2.4  | 3.7  | 3.6  |
| O <sub>LB</sub>       | 1.1  | 1.1  | 23    | 25    | 34   | 33   | 0.96 | 1.1  | 1.9  | 1.3   | 2.1  | 1.9  | 24    | 26   | 7.2  | 6.5  | 2.5  | 2.5  | 3.4  | 3    |
| ΔO <sub>L</sub>       | 0.83 | 0.89 | 27    | 27    | 29   | 32   | 0.72 | 0.6  | 1.2  | 1.8   | 0.23 | 0.23 | 18    | 13   | 3    | 3.9  | 1.1  | 1.4  | 3.6  | 3.8  |
| rel. O <sub>L</sub>   | 1.2  | 1.2  | 1.5   | 1.6   | 6.3  | 4.9  | 0.24 | 1.4  | 1.5  | 0.92  | 2.2  | 2.1  | 11    | 8.7  | 2.8  | 2.3  | 2.2  | 2.2  | 1    | 0.85 |
| ΔT <sub>RL</sub>      | 1    | 0.92 | 27    | 27    | 47   | 47   | 1.3  | 1.2  | 1.5  | 1.8   | 1.5  | 1.1  | 23    | 21   | 16   | 13   | 2.7  | 2.7  | 4.1  | 4    |
| rel. T <sub>RL</sub>  | 1.2  | 1.3  | 0.57  | 0.85  | 5.5  | 4.2  | 0.96 | 1.3  | 0.85 | 0.38  | 2.2  | 2.1  | 11    | 14   | 1.7  | 1.3  | 1.7  | 2.3  | 1.1  | 0.85 |
| ΔH <sub>RL</sub>      | 1.2  | 1.1  | 28    | 28    | 38   | 40   | 1.8  | 1.2  | 1.3  | 1.1   | 1.1  | 1    | 3.5   | 6    | 11   | 8.3  | 2.5  | 2.7  | 2    | 1.8  |
| rel. H <sub>RL</sub>  | 1.1  | 1.1  | 0.057 | 0.17  | 0.52 | 0.1  | 0.84 | 1.3  | 0.38 | 0.15  | 1.8  | 1.9  | 0.88  | 2.8  | 0.28 | 1.3  | 0.49 | 1.8  | 0.85 | 0.71 |
| ΔAr <sub>RL</sub>     | 1.4  | 1.4  | 16    | 17    | 30   | 31   | 1.2  | 0.96 | 3.1  | 2.2   | 0.8  | 0.69 | 2.6   | 1.7  | 7.4  | 7.3  | 0.36 | 0.85 | 0.71 | 0.71 |
| rel. Ar <sub>RL</sub> | 1    | 1    | 0     | 0.28  | 0.83 | 0.73 | 0.12 | 0.84 | 0.23 | 0.077 | 1    | 0.91 | 1.8   | 1.4  | 0.42 | 0.56 | 0.8  | 1.2  | 1.3  | 0.85 |
| ΔD <sub>RL</sub>      | 1.4  | 1.5  | 5.8   | 9.1   | 10   | 6    | 0.72 | 0.96 | 0.54 | 0.077 | 1    | 1    | 12    | 12   | 1.8  | 2.2  | 2.6  | 2.5  | 1.6  | 2.6  |
| rel. D <sub>RL</sub>  | 1    | 1.1  | 0     | 0     | 0    | 0.1  | 1.2  | 1.4  | 0.77 | 0.54  | 0.57 | 1.3  | 0.088 | 0    | 0.49 | 0    | 0.36 | 0.13 | 1.3  | 1.1  |
| ΔAc <sub>RL</sub>     | 1.7  | 1.6  | 13    | 13    | 14   | 8.7  | 1.6  | 1.3  | 0.15 | 0.38  | 2.2  | 2.2  | 0.79  | 0.97 | 4.4  | 4.2  | 1.5  | 1.4  | 0.71 | 0.43 |
| rel. Ac <sub>RL</sub> | 0.93 | 1    | 4.9   | 1.5   | 0.52 | 8.7  | 0.48 | 0.84 | 0.38 | 0.38  | 1    | 2.1  | 1.1   | 1.1  | 0.91 | 0.77 | 1.3  | 1.3  | 1.7  | 0.85 |
| ΔP <sub>RL</sub>      | 0.98 | 1.1  | 13    | 13    | 10   | 12   | 1.2  | 0.84 | 0.85 | 1.3   | 1.3  | 1.3  | 11    | 6.4  | 2.3  | 7.3  | 2.2  | 1.7  | 2.1  | 1    |
| rel. P <sub>RL</sub>  | 1.3  | 1.3  | 0.057 | 0.4   | 0    | 0    | 0.72 | 0.84 | 0.54 | 1     | 1.1  | 0.69 | 0.088 | 0    | 1.1  | 0    | 0    | 0    | 0.71 | 1    |
| ΔN <sub>RL</sub>      | 1.3  | 1.1  | 15    | 6.1   | 17   | 19   | 0.36 | 0.36 | 0.23 | 0.31  | 0.69 | 1    | 0.44  | 3    | 3.7  | 5.8  | 2.6  | 2.7  | 1.3  | 1.4  |
| rel. N <sub>RL</sub>  | 0    | 0    | 0     | 0.057 | 0    | 0    | 0    | 0.72 | 0.54 | 0.69  | 0.69 | 0.8  | 0.71  | 0.26 | 1.5  | 0.28 | 2.5  | 1.5  | 1    | 1.3  |
| ΔO <sub>RL</sub>      | 0.89 | 0.89 | 27    | 27    | 30   | 31   | 0.6  | 0.6  | 1.3  | 1.9   | 0.23 | 0.23 | 18    | 14   | 3    | 3.9  | 1.2  | 1.5  | 3.6  | 3.8  |
| rel. O <sub>RL</sub>  | 1.1  | 1.2  | 1.5   | 1.6   | 6.4  | 4.8  | 0.24 | 1.4  | 1.4  | 1.1   | 2.2  | 2.1  | 11    | 8.9  | 2.7  | 2.3  | 2.2  | 2.2  | 1    | 1    |

**Table S6.** Enrichment Factors at 5% subsetting for protein structures of ten PPI targets obtained using post docking derivatized SASA descriptors.

The best enrichment score corresponding to each target protein (across columns) is shown in bold and highlighted in green.

| SASA descriptor      | BAZ2B  |       | BCL2      |           | BCLXL |       | BRD4-1   |      | CREBBP |            | HIV-IN     |            | XIAP      |           | MCL1 |      | MDM2       |      | Menin |            |
|----------------------|--------|-------|-----------|-----------|-------|-------|----------|------|--------|------------|------------|------------|-----------|-----------|------|------|------------|------|-------|------------|
|                      | 4XUA   | 5E73  | 2021      | 4LVT      | 3INQ  | 3WIZ  | 5D3L     | 5KU3 | 5EIC   | 5MMG       | 4CFD       | 4CHO       | 1TFT      | 5C3H      | 5FC4 | 5MES | 4ODF       | 4ZFI | 5DB2  | 6B41       |
| Surflex              | 0.88   | 0.89  | 11        | 12        | 10    | 9.7   | 1.4      | 0.43 | 1.6    | <b>2.7</b> | <b>1.6</b> | <b>1.6</b> | <b>15</b> | <b>14</b> | 2.8  | 2.5  | <b>2.9</b> | 1.9  | 1.9   | 1.2        |
| T <sub>RU</sub>      | 0.98   | 1     | 17        | 16        | 16    | 16    | 1.6      | 1.2  | 1.4    | 2          | 0.82       | 0.87       | 8.2       | 7.2       | 4.5  | 3.8  | 2.1        | 1.9  | 1.9   | 1.9        |
| T <sub>RB</sub>      | 0.92   | 0.98  | 11        | 10        | 10    | 12    | 1.7      | 1    | 1.2    | 1.9        | 0.98       | 1.3        | 6         | 5.7       | 2.1  | 2.3  | 1.5        | 1.7  | 1.3   | 1.2        |
| ΔT <sub>R</sub>      | 0.94   | 0.99  | <b>18</b> | <b>18</b> | 17    | 17    | 1.6      | 1.4  | 1.9    | 1.7        | 0.8        | 0.82       | 7.3       | 7.4       | 4.9  | 4.8  | 2.2        | 2    | 2.2   | <b>2.5</b> |
| rel. T <sub>R</sub>  | 1      | 1.1   | 0.011     | 0.023     | 0.062 | 0.062 | 0.78     | 0.24 | 0.52   | 0.8        | 0.75       | 0.66       | 0.19      | 0.11      | 0.63 | 0.7  | 0.21       | 0.74 | 0.66  | 0.88       |
| H <sub>RU</sub>      | 0.94   | 1     | 16        | 16        | 15    | 16    | 1.6      | 1.2  | 1.4    | 2.1        | 1          | 0.87       | 4.4       | 7.2       | 4    | 3.5  | 2          | 1.9  | 1.7   | 1.8        |
| H <sub>RB</sub>      | 0.94   | 0.98  | 7.4       | 6.2       | 9.3   | 11    | 1.3      | 0.83 | 1.2    | 2.1        | 1.2        | 1.1        | 2.8       | 5         | 1.7  | 2.2  | 0.93       | 1.6  | 1.3   | 1.6        |
| ΔH <sub>R</sub>      | 0.97   | 1     | 17        | 16        | 16    | 16    | 1.6      | 1.4  | 1.9    | 1.6        | 0.82       | 0.87       | 6         | 9.2       | 4.7  | 3.8  | 2.1        | 2.1  | 2.1   | 2.1        |
| rel. H <sub>R</sub>  | 0.9    | 0.99  | 0.034     | 0.068     | 0.48  | 0.12  | 0.26     | 0.17 | 0.48   | 0.52       | 0.78       | 0.69       | 0         | 0.16      | 0.63 | 0.84 | 0.18       | 0.81 | 0.74  | 1.3        |
| Ar <sub>RU</sub>     | 0.66   | 0.72  | 6         | 12        | 2.6   | 6.9   | 1.6      | 1.4  | 1.7    | 1.4        | 0.59       | 0.75       | 2.2       | 1.4       | 2.5  | 2.2  | 1.8        | 1.6  | 1.4   | 1.4        |
| Ar <sub>RB</sub>     | 0.93   | 0.97  | 0.63      | 0.7       | 0.083 | 3.7   | 0.47     | 0.74 | 1.5    | 1.3        | 0.71       | 0.91       | 1.1       | 0.19      | 1.5  | 1.4  | 1.1        | 1    | 1.1   | 1.2        |
| ΔAr <sub>R</sub>     | 1      | 1     | 12        | 14        | 12    | 8.2   | 1.5      | 1.5  | 1.1    | 1.2        | 0.78       | 0.71       | 2.7       | 2.9       | 3.2  | 2.9  | 2          | 1.9  | 1.5   | 1.5        |
| rel. Ar <sub>R</sub> | 0.88   | 1     | 0.1       | 0.079     | 0.042 | 0.42  | 0.095    | 0.19 | 0.77   | 0.54       | 0.96       | 0.57       | 0.12      | 0.018     | 0.58 | 0.56 | 0.42       | 0.41 | 1.1   | 0.77       |
| D <sub>RU</sub>      | 0.25   | 0.7   | 10        | 10        | 11    | 7     | <b>2</b> | 1.1  | 1      | 1.4        | 0.87       | 0.96       | 5.4       | 2.3       | 2.1  | 3    | 1.6        | 1.5  | 1.4   | 1.7        |
| D <sub>RB</sub>      | 1.1    | 1.1   | 6.5       | 0.93      | 0.71  | 1.8   | 1.9      | 1.1  | 0.94   | 1.2        | 0.87       | 0.98       | 3.3       | 1.3       | 1.1  | 1.4  | 1.5        | 1.3  | 1.1   | 0.68       |
| ΔD <sub>R</sub>      | 0.91   | 0.98  | 8.2       | 12        | 9.7   | 10    | 0.9      | 1.3  | 0.91   | 2.5        | 0.87       | 0.98       | 4.7       | 2.8       | 2.7  | 2.8  | 1.4        | 2    | 1.5   | <b>2.5</b> |
| rel. D <sub>R</sub>  | 1.1    | 1.1   | 0.045     | 0.045     | 0.021 | 0.021 | 1.4      | 1.1  | 0.71   | 0.45       | 0.71       | 1          | 0.28      | 0.25      | 0.32 | 0.49 | 0.39       | 0.18 | 0.8   | 0.77       |
| Ac <sub>RU</sub>     | 0.98   | 0.85  | 12        | 6.6       | 5.4   | 8.9   | 0.95     | 1.1  | 2      | 1.4        | 1.1        | 1.5        | 5.5       | 5.4       | 3.3  | 2.1  | 2.2        | 2    | 1.1   | 1.8        |
| Ac <sub>RB</sub>     | 0.96   | 0.94  | 10        | 4.5       | 4.1   | 2.2   | 0.85     | 1.1  | 1.7    | 1.2        | 1.3        | 1.1        | 0.58      | 2.6       | 2.6  | 1.4  | 2          | 1.9  | 1.1   | 1.1        |
| ΔAc <sub>R</sub>     | 1.1    | 1     | 13        | 7.1       | 7.5   | 9.6   | 0.83     | 1.1  | 1.9    | 1.7        | 0.94       | 1.1        | 3.7       | 3.9       | 3.7  | 3    | 1.4        | 1.6  | 1.1   | 1.8        |
| rel. Ac <sub>R</sub> | 1.1    | 1     | 2.6       | 0.29      | 0.29  | 0.27  | 0.76     | 0.62 | 1      | 0.69       | 0.59       | 0.55       | 0.088     | 0.9       | 0.65 | 0.68 | 1.3        | 1.3  | 1     | 1.1        |
| P <sub>RU</sub>      | 0.0088 | 0.015 | 1.1       | 1.2       | 1.3   | 4     | 1.2      | 0.21 | 0.83   | 1.4        | 1.4        | <b>1.6</b> | 3         | 1.8       | 0.31 | 2.2  | 2          | 0.36 | 1.1   | 1.3        |
| P <sub>RB</sub>      | 0.0088 | 0.015 | 0.68      | 0.82      | 1.6   | 4.7   | 1        | 0.21 | 0.97   | 1.3        | 1.1        | <b>1.6</b> | 2         | 0.81      | 1.5  | 2    | 1.9        | 0.36 | 0.83  | 1.4        |

|               |        |        |      |      |      |      |      |      |      |      |      |      |      |       |      |       |      |      |      |      |
|---------------|--------|--------|------|------|------|------|------|------|------|------|------|------|------|-------|------|-------|------|------|------|------|
| $\Delta P_R$  | 0.0058 | 0.015  | 7.1  | 7.1  | 4.3  | 6    | 1    | 0.19 | 0.98 | 0.95 | 0.78 | 1.5  | 3.2  | 3     | 0.24 | 3.8   | 1.4  | 0.33 | 1.5  | 1.1  |
| rel. $P_R$    | 0.0088 | 0.015  | 0.18 | 0.09 | 0    | 0.6  | 0.97 | 0.21 | 1.7  | 0.92 | 1.2  | 1.5  | 1.8  | 0     | 1.3  | 0.56  | 0.91 | 0.36 | 1.2  | 1.4  |
| $N_{RU}$      | 0.11   | 0.15   | 13   | 8.1  | 10   | 7.3  | 1.7  | 1.4  | 0.74 | 1.7  | 0.82 | 1.1  | 0.69 | 2.3   | 0    | 0.042 | 0.23 | 0.59 | 1.5  | 1.5  |
| $N_{RB}$      | 0.11   | 0.15   | 4.2  | 5.4  | 6.5  | 6.7  | 1.9  | 1.4  | 0.91 | 1.7  | 1.3  | 1.3  | 1.4  | 2.3   | 0.73 | 1     | 0.23 | 0.59 | 1.3  | 1.2  |
| $\Delta N_R$  | 0.24   | 0.31   | 15   | 9.1  | 6.7  | 10   | 1.2  | 1.5  | 0.57 | 1.5  | 0.87 | 1    | 2.7  | 4.2   | 2.3  | 2.1   | 0.22 | 0.58 | 1.7  | 1.7  |
| rel. $N_R$    | 0      | 0      | 0.09 | 0.11 | 0.17 | 0    | 0.62 | 1.1  | 0.82 | 1.4  | 0.96 | 1.1  | 0.49 | 0.088 | 0.73 | 0.97  | 0.23 | 0.59 | 1.2  | 0.88 |
| $O_{RU}$      | 0      | 0.0029 | 1.3  | 8.7  | 9.3  | 4.9  | 0.12 | 0.14 | 1.7  | 0.8  | 1.3  | 1.1  | 1.2  | 0.49  | 0.72 | 0     | 1.3  | 1    | 1.3  | 1.2  |
| $O_{RB}$      | 0.99   | 0.97   | 0.56 | 2    | 1.4  | 0.89 | 0.14 | 0.24 | 1.3  | 0.71 | 1    | 0.82 | 1    | 3.1   | 1.3  | 0     | 1.2  | 1.4  | 0.91 | 1.2  |
| $\Delta O_R$  | 0.97   | 0.92   | 0.56 | 8.5  | 3.1  | 1.7  | 1.1  | 0.21 | 2.1  | 1.3  | 1.4  | 1.2  | 1.2  | 4.6   | 0    | 0     | 0.61 | 1.7  | 1.2  | 1.4  |
| rel. $O_R$    | 0.98   | 1.1    | 0    | 0.32 | 0.48 | 0    | 0.14 | 0.24 | 0.35 | 0.65 | 1    | 0.85 | 0    | 0     | 1.3  | 0     | 0.93 | 0.32 | 0.77 | 1.3  |
| $T_{LU}$      | 0.96   | 0.97   | 18   | 18   | 18   | 18   | 1.4  | 1.3  | 1.8  | 1.9  | 0.78 | 0.8  | 13   | 13    | 5.4  | 5.2   | 2.1  | 2.1  | 2.4  | 2.3  |
| $T_{LB}$      | 1      | 1.1    | 17   | 17   | 17   | 16   | 1.3  | 1.1  | 2    | 1.4  | 0.82 | 0.82 | 9.3  | 12    | 5.2  | 5.2   | 2    | 2.1  | 1.9  | 2.1  |
| $\Delta T_L$  | 0.93   | 0.89   | 17   | 17   | 16   | 17   | 1.3  | 1    | 1.3  | 1.5  | 0.82 | 1.1  | 12   | 7.6   | 4.3  | 4.3   | 2.6  | 2.4  | 2.7  | 2.4  |
| rel. $T_L$    | 1      | 1.1    | 3    | 3.9  | 7.4  | 5.2  | 1.1  | 1.4  | 1.4  | 0.91 | 0.85 | 0.8  | 5.2  | 7.1   | 3    | 2.6   | 1.3  | 1.7  | 1.2  | 1.4  |
| $H_{LU}$      | 1.1    | 1.1    | 9.3  | 9.1  | 8.5  | 9.2  | 1.1  | 1.1  | 1.6  | 1.6  | 0.69 | 0.64 | 1.8  | 1.9   | 3.3  | 3.5   | 1.8  | 1.9  | 0.68 | 0.74 |
| $H_{LB}$      | 0.98   | 1.1    | 8.9  | 6.2  | 8.2  | 8.6  | 1.2  | 1.6  | 1.8  | 2.3  | 1.1  | 1.1  | 4    | 4.4   | 3.3  | 3.3   | 1.6  | 2.4  | 0.77 | 0.83 |
| $\Delta H_L$  | 1.1    | 1      | 6.9  | 8.8  | 7.1  | 6.5  | 0.85 | 0.57 | 1.4  | 1.3  | 0.75 | 0.55 | 0.21 | 0.16  | 2.5  | 2.2   | 2.4  | 2.2  | 0.97 | 0.71 |
| rel. $H_L$    | 0.98   | 0.96   | 3.2  | 1.8  | 3.8  | 2.4  | 1.6  | 1.8  | 1.1  | 1.5  | 1.5  | 1.4  | 3.8  | 5.8   | 1.1  | 1.3   | 1.3  | 1.9  | 1    | 1.2  |
| $Ar_{LU}$     | 1.2    | 1.1    | 5.3  | 4.7  | 11   | 12   | 0.9  | 0.81 | 2.2  | 2.2  | 1.1  | 1    | 1.7  | 2.1   | 4.7  | 4.5   | 0.27 | 0.24 | 0.57 | 0.6  |
| $Ar_{LB}$     | 1.1    | 1.1    | 6.1  | 5.2  | 11   | 10   | 1.1  | 1.1  | 1.6  | 1.6  | 0.82 | 1.1  | 4.5  | 5.6   | 4.3  | 3.9   | 0.43 | 0.49 | 0.68 | 0.68 |
| $\Delta Ar_L$ | 1.2    | 1.2    | 4.5  | 3.8  | 6.8  | 9    | 0.64 | 0.43 | 2.5  | 2.3  | 0.94 | 0.8  | 0.3  | 0.16  | 3.9  | 3.4   | 0.21 | 0.19 | 0.63 | 0.77 |
| rel. $Ar_L$   | 0.92   | 1      | 2.4  | 1.3  | 3.2  | 2    | 0.9  | 1.3  | 0.34 | 0.57 | 1.1  | 1.1  | 3.8  | 5     | 0.94 | 0.84  | 1.4  | 1.8  | 1.1  | 1.2  |
| $D_{LU}$      | 1.2    | 1.3    | 1.3  | 1.4  | 1.6  | 1.6  | 1    | 1    | 0.48 | 0.46 | 0.78 | 0.78 | 5.4  | 5.5   | 1.1  | 1.1   | 1.5  | 1.5  | 0.77 | 0.8  |
| $D_{LB}$      | 1.1    | 1      | 3    | 3.5  | 2.5  | 2.6  | 1.3  | 1.6  | 0.72 | 0.71 | 0.89 | 0.87 | 3.8  | 3     | 1.6  | 1.8   | 1.7  | 1.5  | 0.97 | 1    |
| $\Delta D_L$  | 1.2    | 1.2    | 1.5  | 1.2  | 1.4  | 1.4  | 0.88 | 0.78 | 0.52 | 0.57 | 0.66 | 0.64 | 4.7  | 4.9   | 1.3  | 1.1   | 1.3  | 1.4  | 0.77 | 0.91 |
| rel. $D_L$    | 0.88   | 0.98   | 1.5  | 1.5  | 2.6  | 2.4  | 1.2  | 1.4  | 1    | 1    | 1.1  | 1.1  | 0.19 | 0.053 | 1.3  | 1.4   | 1    | 0.81 | 1.3  | 1.3  |
| $Ac_{LU}$     | 1.3    | 1.2    | 11   | 11   | 7.9  | 8.4  | 1.3  | 1.4  | 0.38 | 0.43 | 1.1  | 1.1  | 1.2  | 1.4   | 3.3  | 3.3   | 1.4  | 1.4  | 0.37 | 0.43 |
| $Ac_{LB}$     | 1      | 1.1    | 12   | 10   | 7.7  | 9    | 1.2  | 1.4  | 1.1  | 0.62 | 1.2  | 1    | 2.4  | 2.5   | 3.3  | 2.9   | 1.6  | 2    | 0.71 | 0.83 |
| $\Delta Ac_L$ | 1.3    | 1.2    | 4.8  | 4.6  | 4.4  | 3.8  | 1.3  | 0.97 | 0.42 | 0.55 | 1.1  | 1.2  | 0.44 | 0.34  | 2.3  | 1.9   | 1.2  | 0.94 | 0.43 | 0.26 |
| rel. $Ac_L$   | 1.1    | 1      | 3.6  | 2.2  | 2.7  | 3.2  | 0.55 | 0.78 | 1.1  | 0.72 | 1.1  | 1.3  | 0.79 | 0.65  | 1.5  | 1.2   | 1.2  | 1.1  | 1    | 0.74 |

|                       |      |      |       |       |       |      |      |      |      |      |      |      |       |      |      |      |      |      |      |      |
|-----------------------|------|------|-------|-------|-------|------|------|------|------|------|------|------|-------|------|------|------|------|------|------|------|
| P <sub>LU</sub>       | 1.3  | 1.3  | 2.5   | 2.5   | 3.3   | 1.9  | 0.36 | 0.36 | 0.43 | 0.43 | 0.39 | 0.39 | 2.6   | 2.6  | 1.5  | 1.5  | 0.91 | 0.88 | 0.57 | 0.66 |
| P <sub>LB</sub>       | 0.59 | 0.77 | 3.6   | 3.3   | 2.8   | 2.7  | 0.17 | 0.21 | 0.66 | 0.65 | 0.37 | 0.48 | 0.88  | 0.56 | 2    | 2.1  | 0.87 | 0.65 | 0.43 | 0.74 |
| ΔP <sub>L</sub>       | 1.3  | 1.3  | 2.8   | 4.2   | 3.3   | 2.8  | 0.36 | 0.36 | 0.42 | 0.42 | 0.37 | 0.32 | 2.4   | 2.5  | 1.6  | 1.4  | 0.9  | 0.89 | 0.74 | 0.51 |
| rel. P <sub>L</sub>   | 0.59 | 0.77 | 4.7   | 4.4   | 2.9   | 4    | 0.17 | 0.21 | 0.66 | 0.65 | 0.37 | 0.48 | 0.88  | 0.58 | 2    | 2.4  | 1.5  | 0.63 | 0.4  | 0.74 |
| N <sub>LU</sub>       | 0.77 | 0.77 | 1.7   | 1.7   | 7.6   | 7.6  | 0.24 | 0.24 | 0.35 | 0.34 | 0.82 | 1.3  | 0.95  | 0.95 | 4.5  | 4.4  | 2.8  | 2.8  | 0.63 | 0.68 |
| N <sub>LB</sub>       | 0.72 | 0.71 | 1.6   | 1.7   | 7.5   | 7.4  | 0.24 | 0.24 | 0.26 | 0.25 | 0.78 | 1.1  | 0.94  | 0.95 | 4.5  | 4.4  | 2.8  | 2.8  | 0.66 | 0.83 |
| ΔN <sub>L</sub>       | 0.76 | 0.76 | 1.7   | 1.6   | 7.5   | 7.5  | 0.24 | 0.24 | 0.2  | 0.28 | 1.2  | 1.1  | 0.86  | 0.85 | 4.4  | 4.5  | 2.8  | 2.8  | 0.66 | 0.54 |
| rel. N <sub>L</sub>   | 0.72 | 0.71 | 1.6   | 1.7   | 7.5   | 7.4  | 0.24 | 0.24 | 0.26 | 0.25 | 0.8  | 1.2  | 0.94  | 0.95 | 4.6  | 4.5  | 2.8  | 2.8  | 0.66 | 0.83 |
| O <sub>LU</sub>       | 0.78 | 0.82 | 17    | 17    | 14    | 14   | 1    | 0.9  | 1.2  | 1.3  | 0.69 | 0.69 | 12    | 12   | 2.7  | 2.7  | 1.6  | 1.6  | 2.3  | 2.3  |
| O <sub>LB</sub>       | 1    | 0.94 | 12    | 14    | 13    | 12   | 1.2  | 1.1  | 1.6  | 1.1  | 0.69 | 0.71 | 9.7   | 12   | 2.9  | 2.8  | 1.9  | 1.8  | 2.2  | 2.1  |
| ΔO <sub>L</sub>       | 0.76 | 0.85 | 15    | 15    | 11    | 12   | 0.88 | 0.85 | 0.88 | 1.1  | 0.57 | 0.5  | 9.4   | 6.9  | 1.9  | 2.1  | 1.3  | 1.4  | 2.3  | 2.3  |
| rel. O <sub>L</sub>   | 1.1  | 1.1  | 1.2   | 1.8   | 4     | 2.5  | 1    | 1.2  | 1.4  | 0.88 | 0.82 | 0.85 | 3.6   | 4.2  | 2.2  | 2.1  | 1.6  | 1.6  | 1.1  | 1.2  |
| ΔT <sub>RL</sub>      | 0.89 | 0.93 | 18    | 18    | 17    | 17   | 1.4  | 1.2  | 1.7  | 1.8  | 0.78 | 0.94 | 11    | 7.9  | 4.8  | 4.6  | 2.4  | 2.2  | 2.5  | 2.5  |
| rel. T <sub>RL</sub>  | 1.1  | 1.1  | 0.36  | 0.55  | 2.3   | 1.7  | 0.83 | 1.3  | 0.92 | 0.58 | 0.94 | 0.94 | 3     | 5    | 1.3  | 1.5  | 0.83 | 1.5  | 0.83 | 1    |
| ΔH <sub>RL</sub>      | 1.1  | 1    | 16    | 15    | 13    | 15   | 1.4  | 1.1  | 2.3  | 1.7  | 0.91 | 0.64 | 1.9   | 2.5  | 4.5  | 3.9  | 2.8  | 2.4  | 1.8  | 1.6  |
| rel. H <sub>RL</sub>  | 0.95 | 1    | 0.11  | 0.24  | 1     | 0.27 | 0.76 | 1.4  | 0.45 | 0.65 | 1.3  | 1.5  | 0.56  | 2.5  | 0.65 | 1.2  | 0.35 | 1.5  | 0.85 | 0.94 |
| ΔAr <sub>RL</sub>     | 1.2  | 1.1  | 8.6   | 9.7   | 13    | 12   | 1.2  | 0.85 | 2.5  | 2.2  | 0.87 | 0.8  | 1.5   | 0.74 | 4.3  | 3.8  | 0.35 | 0.54 | 0.88 | 0.94 |
| rel. Ar <sub>RL</sub> | 1    | 1    | 0.15  | 0.44  | 0.62  | 1.1  | 0.66 | 0.76 | 0.34 | 0.31 | 1    | 0.94 | 1.5   | 1.4  | 0.59 | 0.25 | 0.8  | 1.1  | 1    | 1.2  |
| ΔD <sub>RL</sub>      | 1.2  | 1.3  | 6.9   | 9.2   | 7.7   | 3.7  | 0.88 | 0.85 | 0.55 | 0.31 | 0.75 | 0.78 | 7.4   | 8.3  | 1.8  | 1.9  | 1.4  | 1.8  | 1    | 1.2  |
| rel. D <sub>RL</sub>  | 1.1  | 1    | 0.068 | 0     | 0.021 | 0.25 | 1.4  | 1.3  | 1.1  | 0.69 | 0.87 | 0.87 | 0.071 | 0.11 | 0.51 | 0.46 | 0.65 | 0.39 | 0.8  | 0.91 |
| ΔAc <sub>RL</sub>     | 1.2  | 1.2  | 7.7   | 7.2   | 6.5   | 4.8  | 1.2  | 1    | 0.57 | 0.66 | 1    | 1.3  | 0.86  | 0.99 | 2.4  | 2.4  | 1.3  | 1.1  | 0.48 | 0.43 |
| rel. Ac <sub>RL</sub> | 0.97 | 1    | 4.8   | 1.8   | 1.6   | 4.8  | 0.83 | 0.93 | 0.94 | 0.48 | 1    | 1.2  | 1     | 1.1  | 1.4  | 1.2  | 1.5  | 1.3  | 1.1  | 0.97 |
| ΔP <sub>RL</sub>      | 1.3  | 1.3  | 7.1   | 7.1   | 4.5   | 6.1  | 0.97 | 0.4  | 0.97 | 0.95 | 0.75 | 1.3  | 3.1   | 3.1  | 1.4  | 3.9  | 1.4  | 1    | 1.5  | 0.54 |
| rel. P <sub>RL</sub>  | 0.6  | 0.78 | 0.19  | 0.12  | 0.042 | 0.64 | 0.97 | 0.28 | 1.7  | 0.94 | 1.2  | 1.3  | 1.9   | 0    | 1.2  | 0.52 | 0.87 | 0.72 | 1.1  | 1.3  |
| ΔN <sub>RL</sub>      | 0.94 | 0.91 | 13    | 6     | 9.6   | 10   | 1    | 1.1  | 0.2  | 0.28 | 1    | 1.1  | 1.9   | 2.8  | 4.4  | 4.6  | 2.8  | 2.7  | 0.85 | 0.77 |
| rel. N <sub>RL</sub>  | 0    | 0    | 0.079 | 0.079 | 0     | 0    | 0.64 | 1.1  | 0.82 | 1.4  | 1    | 1.3  | 0.53  | 0.18 | 0.96 | 0.94 | 2.7  | 2    | 1.2  | 0.97 |
| ΔO <sub>RL</sub>      | 0.77 | 0.83 | 15    | 15    | 11    | 12   | 0.85 | 0.85 | 0.94 | 1.1  | 0.57 | 0.5  | 9.4   | 7.3  | 1.9  | 2.1  | 1.3  | 1.4  | 2.4  | 2.3  |
| rel. O <sub>RL</sub>  | 1.1  | 1.1  | 1.2   | 1.8   | 3.9   | 2.2  | 1    | 1.2  | 1.3  | 0.8  | 0.82 | 0.82 | 3.6   | 4.3  | 2.2  | 2.1  | 1.5  | 1.5  | 1.1  | 1.2  |



**Table S7.** 10-fold Cross-Validation TN, FP, FN, TP, Total, Sensitivity, Specificity, Precision, Concordance (Accuracy), J, MCC, F<sub>1</sub>, k, ROC score, EF 1%, and EF 5% values for the different machine learning models obtained on 10 PPI targets with a total of 20 protein structures.

| Target | PDB ID | ML techniques        | TN    | FP  | FN   | TP   | Total | Sensitivity | Specificity | Precision | Concordance | J     | MCC   | F <sub>1</sub> | k     | ROC score | EF 1%  | EF 5%  |
|--------|--------|----------------------|-------|-----|------|------|-------|-------------|-------------|-----------|-------------|-------|-------|----------------|-------|-----------|--------|--------|
| BAZ2B  | 4XUA   | Tree                 | 34598 | 0   | 4794 | 0    | 39392 | 0.000       | 1.000       | N/A       | 0.878       | 0.000 | N/A   | N/A            | 0.000 | 0.543     | 2.127  | 1.633  |
|        |        | Bagged forest        | 34598 | 0   | 4794 | 0    | 39392 | 0.000       | 1.000       | N/A       | 0.878       | 0.000 | N/A   | N/A            | 0.000 | 0.500     | 1.000  | 1.000  |
|        |        | Random forest        | 34598 | 0   | 4794 | 0    | 39392 | 0.000       | 1.000       | N/A       | 0.878       | 0.000 | N/A   | N/A            | 0.000 | 0.601     | 3.931  | 2.345  |
|        |        | Bayesian             | 34543 | 55  | 4722 | 72   | 39392 | 0.015       | 0.998       | 0.567     | 0.879       | 0.013 | 0.077 | 0.029          | 0.023 | 0.602     | 3.136  | 2.032  |
|        |        | SVM                  | 34492 | 106 | 4181 | 613  | 39392 | 0.128       | 0.997       | 0.853     | 0.891       | 0.125 | 0.305 | 0.222          | 0.197 | 0.758     | 7.464  | 5.125  |
|        |        | Logistic regression  | 34598 | 0   | 4794 | 0    | 39392 | 0.000       | 1.000       | N/A       | 0.878       | 0.000 | N/A   | N/A            | 0.000 | 0.550     | 1.296  | 1.081  |
|        |        | Neural net           | 34598 | 0   | 4794 | 0    | 39392 | 0.000       | 1.000       | N/A       | 0.878       | 0.000 | N/A   | N/A            | 0.000 | 0.543     | 1.066  | 1.181  |
|        |        | Neural net (bagging) | 34598 | 0   | 4794 | 0    | 39392 | 0.000       | 1.000       | N/A       | 0.878       | 0.000 | N/A   | N/A            | 0.000 | 0.651     | 3.952  | 2.667  |
|        | 5E73   | Tree                 | 34598 | 0   | 4794 | 0    | 39392 | 0.000       | 1.000       | N/A       | 0.878       | 0.000 | N/A   | N/A            | 0.000 | 0.534     | 1.922  | 1.490  |
|        |        | Bagged forest        | 34598 | 0   | 4794 | 0    | 39392 | 0.000       | 1.000       | N/A       | 0.878       | 0.000 | N/A   | N/A            | 0.000 | 0.500     | 1.000  | 1.000  |
|        |        | Random forest        | 34598 | 0   | 4794 | 0    | 39392 | 0.000       | 1.000       | N/A       | 0.878       | 0.000 | N/A   | N/A            | 0.000 | 0.631     | 3.617  | 2.391  |
|        |        | Bayesian             | 34499 | 99  | 4699 | 95   | 39392 | 0.020       | 0.997       | 0.490     | 0.878       | 0.017 | 0.079 | 0.038          | 0.029 | 0.602     | 3.178  | 2.070  |
|        |        | SVM                  | 34492 | 106 | 4065 | 729  | 39392 | 0.152       | 0.997       | 0.873     | 0.894       | 0.149 | 0.338 | 0.259          | 0.231 | 0.772     | 7.569  | 5.738  |
|        |        | Logistic regression  | 34598 | 0   | 4793 | 1    | 39392 | 0.000       | 1.000       | 1.000     | 0.878       | 0.000 | 0.014 | 0.000          | 0.000 | 0.535     | 1.443  | 1.089  |
|        |        | Neural net           | 34598 | 0   | 4794 | 0    | 39392 | 0.000       | 1.000       | N/A       | 0.878       | 0.000 | N/A   | N/A            | 0.000 | 0.542     | 1.422  | 1.294  |
|        |        | Neural net (bagging) | 34598 | 0   | 4794 | 0    | 39392 | 0.000       | 1.000       | N/A       | 0.878       | 0.000 | N/A   | N/A            | 0.000 | 0.671     | 4.286  | 2.942  |
| Bcl-2  | 2O21   | Tree                 | 34305 | 38  | 166  | 1074 | 35583 | 0.866       | 0.999       | 0.966     | 0.994       | 0.865 | 0.912 | 0.913          | 0.910 | 0.965     | 28.557 | 18.313 |
|        |        | Bagged forest        | 34262 | 81  | 147  | 1093 | 35583 | 0.881       | 0.998       | 0.931     | 0.994       | 0.879 | 0.903 | 0.906          | 0.902 | 0.943     | 27.496 | 17.798 |
|        |        | Random forest        | 34305 | 38  | 152  | 1088 | 35583 | 0.877       | 0.999       | 0.966     | 0.995       | 0.876 | 0.918 | 0.920          | 0.917 | 0.999     | 28.696 | 19.663 |
|        |        | Bayesian             | 33822 | 521 | 124  | 1116 | 35583 | 0.900       | 0.985       | 0.682     | 0.982       | 0.885 | 0.775 | 0.776          | 0.767 | 0.984     | 28.546 | 18.066 |
|        |        | SVM                  | 34322 | 21  | 99   | 1141 | 35583 | 0.920       | 0.999       | 0.982     | 0.997       | 0.920 | 0.949 | 0.950          | 0.948 | 0.990     | 28.696 | 19.292 |
|        |        | Logistic regression  | 34318 | 25  | 418  | 822  | 35583 | 0.663       | 0.999       | 0.970     | 0.988       | 0.662 | 0.797 | 0.788          | 0.782 | 0.973     | 27.483 | 18.098 |
|        |        | Neural net           | 34307 | 36  | 170  | 1070 | 35583 | 0.863       | 0.999       | 0.967     | 0.994       | 0.862 | 0.911 | 0.912          | 0.909 | 0.992     | 28.696 | 18.937 |

|        |      |                      |       |      |     |      |       |       |       |       |       |       |       |       |       |       |        |        |
|--------|------|----------------------|-------|------|-----|------|-------|-------|-------|-------|-------|-------|-------|-------|-------|-------|--------|--------|
|        | 4LVT | Neural net (bagging) | 34341 | 2    | 27  | 1213 | 35583 | 0.978 | 1.000 | 0.998 | 0.999 | 0.978 | 0.988 | 0.988 | 0.988 | 1.000 | 28.696 | 20.002 |
|        |      | Tree                 | 34311 | 32   | 173 | 1067 | 35583 | 0.860 | 0.999 | 0.971 | 0.994 | 0.860 | 0.911 | 0.912 | 0.909 | 0.948 | 28.581 | 17.984 |
|        |      | Bagged forest        | 34259 | 84   | 155 | 1085 | 35583 | 0.875 | 0.998 | 0.928 | 0.993 | 0.873 | 0.898 | 0.901 | 0.897 | 0.940 | 27.278 | 17.687 |
|        |      | Random forest        | 34310 | 33   | 151 | 1089 | 35583 | 0.878 | 0.999 | 0.971 | 0.995 | 0.877 | 0.921 | 0.922 | 0.919 | 0.998 | 28.696 | 19.469 |
|        |      | Bayesian             | 33886 | 457  | 125 | 1115 | 35583 | 0.899 | 0.987 | 0.709 | 0.984 | 0.886 | 0.791 | 0.793 | 0.785 | 0.984 | 28.516 | 18.227 |
|        |      | SVM                  | 34324 | 19   | 117 | 1123 | 35583 | 0.906 | 0.999 | 0.983 | 0.996 | 0.905 | 0.942 | 0.943 | 0.941 | 0.988 | 28.696 | 19.292 |
|        |      | Logistic regression  | 34316 | 27   | 451 | 789  | 35583 | 0.636 | 0.999 | 0.967 | 0.987 | 0.636 | 0.779 | 0.768 | 0.761 | 0.979 | 27.079 | 18.195 |
|        |      | Neural net           | 34299 | 44   | 164 | 1076 | 35583 | 0.868 | 0.999 | 0.961 | 0.994 | 0.866 | 0.910 | 0.912 | 0.909 | 0.989 | 28.615 | 18.889 |
|        |      | Neural net (bagging) | 34341 | 2    | 16  | 1224 | 35583 | 0.987 | 1.000 | 0.998 | 0.999 | 0.987 | 0.992 | 0.993 | 0.992 | 1.000 | 28.696 | 20.002 |
| Bcl-xL | 3INQ | Tree                 | 34382 | 38   | 131 | 543  | 35094 | 0.806 | 0.999 | 0.935 | 0.995 | 0.805 | 0.865 | 0.865 | 0.863 | 0.971 | 51.306 | 18.616 |
|        |      | Bagged forest        | 34346 | 74   | 141 | 533  | 35094 | 0.791 | 0.998 | 0.878 | 0.994 | 0.789 | 0.830 | 0.832 | 0.829 | 0.907 | 46.798 | 16.444 |
|        |      | Random forest        | 34401 | 19   | 129 | 545  | 35094 | 0.809 | 0.999 | 0.966 | 0.996 | 0.808 | 0.882 | 0.880 | 0.878 | 0.997 | 52.068 | 19.563 |
|        |      | Bayesian             | 33764 | 656  | 72  | 602  | 35094 | 0.893 | 0.981 | 0.479 | 0.979 | 0.874 | 0.645 | 0.623 | 0.614 | 0.983 | 49.688 | 18.405 |
|        |      | SVM                  | 34404 | 16   | 72  | 602  | 35094 | 0.893 | 1.000 | 0.974 | 0.997 | 0.893 | 0.932 | 0.932 | 0.931 | 0.991 | 51.771 | 19.266 |
|        |      | Logistic regression  | 34402 | 18   | 511 | 163  | 35094 | 0.242 | 0.999 | 0.901 | 0.985 | 0.241 | 0.462 | 0.381 | 0.376 | 0.980 | 46.861 | 18.494 |
|        |      | Neural net           | 34379 | 41   | 123 | 551  | 35094 | 0.818 | 0.999 | 0.931 | 0.995 | 0.816 | 0.870 | 0.870 | 0.868 | 0.987 | 51.919 | 19.028 |
|        |      | Neural net (bagging) | 34418 | 2    | 7   | 667  | 35094 | 0.990 | 1.000 | 0.997 | 1.000 | 0.990 | 0.993 | 0.993 | 0.993 | 1.000 | 52.068 | 20.008 |
|        | 3WIZ | Tree                 | 34399 | 21   | 159 | 515  | 35094 | 0.764 | 0.999 | 0.961 | 0.995 | 0.763 | 0.854 | 0.851 | 0.849 | 0.973 | 50.892 | 18.713 |
|        |      | Bagged forest        | 34352 | 68   | 148 | 526  | 35094 | 0.780 | 0.998 | 0.886 | 0.994 | 0.778 | 0.828 | 0.830 | 0.827 | 0.906 | 46.432 | 16.415 |
|        |      | Random forest        | 34396 | 24   | 128 | 546  | 35094 | 0.810 | 0.999 | 0.958 | 0.996 | 0.809 | 0.879 | 0.878 | 0.876 | 0.998 | 52.068 | 19.622 |
|        |      | Bayesian             | 31015 | 3405 | 43  | 631  | 35094 | 0.936 | 0.901 | 0.156 | 0.902 | 0.837 | 0.360 | 0.268 | 0.243 | 0.977 | 50.581 | 17.663 |
|        |      | SVM                  | 34420 | 0    | 14  | 660  | 35094 | 0.979 | 1.000 | 1.000 | 1.000 | 0.979 | 0.989 | 0.990 | 0.989 | 1.000 | 52.068 | 19.949 |
|        |      | Logistic regression  | 34405 | 15   | 577 | 97   | 35094 | 0.144 | 1.000 | 0.866 | 0.983 | 0.143 | 0.349 | 0.247 | 0.243 | 0.975 | 47.456 | 18.405 |
|        |      | Neural net           | 34397 | 23   | 127 | 547  | 35094 | 0.812 | 0.999 | 0.960 | 0.996 | 0.811 | 0.880 | 0.879 | 0.877 | 0.988 | 44.641 | 15.979 |
|        |      | Neural net (bagging) | 34420 | 0    | 13  | 661  | 35094 | 0.981 | 1.000 | 1.000 | 1.000 | 0.981 | 0.990 | 0.990 | 0.990 | 1.000 | 52.068 | 20.008 |
| BRD4-1 | 5D3L | Tree                 | 624   | 63   | 73  | 519  | 1279  | 0.877 | 0.908 | 0.892 | 0.894 | 0.785 | 0.786 | 0.884 | 0.786 | 0.962 | 2.155  | 2.150  |
|        |      | Bagged forest        | 638   | 49   | 66  | 526  | 1279  | 0.889 | 0.929 | 0.915 | 0.910 | 0.817 | 0.819 | 0.901 | 0.819 | 0.972 | 2.160  | 2.160  |
|        |      | Random forest        | 614   | 73   | 59  | 533  | 1279  | 0.900 | 0.894 | 0.880 | 0.897 | 0.794 | 0.793 | 0.890 | 0.793 | 0.968 | 2.160  | 2.160  |
|        |      | Bayesian             | 585   | 102  | 69  | 523  | 1279  | 0.883 | 0.852 | 0.837 | 0.866 | 0.735 | 0.733 | 0.859 | 0.732 | 0.936 | 2.160  | 2.160  |

|        |      |                      |       |      |     |     |       |       |       |       |       |       |       |       |       |       |        |        |
|--------|------|----------------------|-------|------|-----|-----|-------|-------|-------|-------|-------|-------|-------|-------|-------|-------|--------|--------|
| CREBBP | 5KU3 | SVM                  | 619   | 68   | 74  | 518 | 1279  | 0.875 | 0.901 | 0.884 | 0.889 | 0.776 | 0.777 | 0.879 | 0.777 | 0.952 | 1.980  | 2.126  |
|        |      | Logistic regression  | 629   | 58   | 139 | 453 | 1279  | 0.765 | 0.916 | 0.886 | 0.846 | 0.681 | 0.693 | 0.821 | 0.687 | 0.917 | 2.160  | 2.092  |
|        |      | Neural net           | 600   | 87   | 79  | 513 | 1279  | 0.867 | 0.873 | 0.855 | 0.870 | 0.740 | 0.739 | 0.861 | 0.739 | 0.947 | 2.160  | 2.160  |
|        |      | Neural net (bagging) | 687   | 0    | 0   | 592 | 1279  | 1.000 | 1.000 | 1.000 | 1.000 | 1.000 | 1.000 | 1.000 | 1.000 | 1.000 | 2.160  | 2.160  |
|        |      | Tree                 | 635   | 52   | 42  | 550 | 1279  | 0.929 | 0.924 | 0.914 | 0.927 | 0.853 | 0.852 | 0.921 | 0.852 | 0.972 | 2.160  | 2.160  |
|        |      | Bagged forest        | 614   | 73   | 50  | 542 | 1279  | 0.916 | 0.894 | 0.881 | 0.904 | 0.809 | 0.808 | 0.898 | 0.807 | 0.966 | 2.160  | 2.160  |
|        |      | Random forest        | 581   | 106  | 55  | 537 | 1279  | 0.907 | 0.846 | 0.835 | 0.874 | 0.753 | 0.751 | 0.870 | 0.748 | 0.957 | 2.160  | 2.160  |
|        |      | Bayesian             | 540   | 147  | 65  | 527 | 1279  | 0.890 | 0.786 | 0.782 | 0.834 | 0.676 | 0.675 | 0.833 | 0.670 | 0.924 | 2.160  | 2.160  |
|        | 5EIC | SVM                  | 591   | 96   | 88  | 504 | 1279  | 0.851 | 0.860 | 0.840 | 0.856 | 0.712 | 0.711 | 0.846 | 0.711 | 0.927 | 2.160  | 2.126  |
|        |      | Logistic regression  | 611   | 76   | 139 | 453 | 1279  | 0.765 | 0.889 | 0.856 | 0.832 | 0.655 | 0.663 | 0.808 | 0.659 | 0.900 | 2.160  | 2.126  |
|        |      | Neural net           | 581   | 106  | 88  | 504 | 1279  | 0.851 | 0.846 | 0.826 | 0.848 | 0.697 | 0.696 | 0.839 | 0.696 | 0.928 | 2.160  | 2.160  |
|        |      | Neural net (bagging) | 687   | 0    | 1   | 591 | 1279  | 0.998 | 1.000 | 1.000 | 0.999 | 0.998 | 0.998 | 0.999 | 0.998 | 1.000 | 2.160  | 2.160  |
|        |      | Tree                 | 32425 | 0    | 910 | 0   | 33335 | 0.000 | 1.000 | N/A   | 0.973 | 0.000 | N/A   | N/A   | 0.000 | 0.635 | 5.140  | 3.225  |
|        |      | Bagged forest        | 32425 | 0    | 910 | 0   | 33335 | 0.000 | 1.000 | N/A   | 0.973 | 0.000 | N/A   | N/A   | 0.000 | 0.500 | 1.000  | 1.000  |
|        |      | Random forest        | 32425 | 0    | 910 | 0   | 33335 | 0.000 | 1.000 | N/A   | 0.973 | 0.000 | N/A   | N/A   | 0.000 | 0.887 | 24.531 | 10.356 |
|        |      | Bayesian             | 31019 | 1406 | 677 | 233 | 33335 | 0.256 | 0.957 | 0.142 | 0.938 | 0.213 | 0.160 | 0.183 | 0.153 | 0.794 | 9.020  | 5.211  |
| HIV IN | 5MMG | SVM                  | 32392 | 33   | 535 | 375 | 33335 | 0.412 | 0.999 | 0.919 | 0.983 | 0.411 | 0.609 | 0.569 | 0.562 | 0.938 | 34.872 | 13.545 |
|        |      | Logistic regression  | 32425 | 0    | 910 | 0   | 33335 | 0.000 | 1.000 | N/A   | 0.973 | 0.000 | N/A   | N/A   | 0.000 | 0.766 | 6.820  | 4.683  |
|        |      | Neural net           | 32425 | 0    | 910 | 0   | 33335 | 0.000 | 1.000 | N/A   | 0.973 | 0.000 | N/A   | N/A   | 0.000 | 0.766 | 7.810  | 4.683  |
|        |      | Neural net (bagging) | 32425 | 0    | 901 | 9   | 33335 | 0.010 | 1.000 | 1.000 | 0.973 | 0.010 | 0.098 | 0.020 | 0.019 | 0.938 | 26.951 | 12.489 |
|        |      | Tree                 | 32425 | 0    | 910 | 0   | 33335 | 0.000 | 1.000 | N/A   | 0.973 | 0.000 | N/A   | N/A   | 0.000 | 0.714 | 6.344  | 3.832  |
|        |      | Bagged forest        | 32425 | 0    | 910 | 0   | 33335 | 0.000 | 1.000 | N/A   | 0.973 | 0.000 | N/A   | N/A   | 0.000 | 0.500 | 1.000  | 1.000  |
|        |      | Random forest        | 32425 | 0    | 910 | 0   | 33335 | 0.000 | 1.000 | N/A   | 0.973 | 0.000 | N/A   | N/A   | 0.000 | 0.883 | 20.131 | 10.224 |
|        |      | Bayesian             | 29632 | 2793 | 636 | 274 | 33335 | 0.301 | 0.914 | 0.089 | 0.897 | 0.215 | 0.121 | 0.138 | 0.100 | 0.746 | 4.840  | 3.980  |
|        | 4CFD | SVM                  | 32398 | 27   | 467 | 443 | 33335 | 0.487 | 0.999 | 0.943 | 0.985 | 0.486 | 0.672 | 0.642 | 0.635 | 0.946 | 36.412 | 14.138 |
|        |      | Logistic regression  | 32425 | 0    | 910 | 0   | 33335 | 0.000 | 1.000 | N/A   | 0.973 | 0.000 | N/A   | N/A   | 0.000 | 0.734 | 5.500  | 4.486  |
|        |      | Neural net           | 32425 | 0    | 910 | 0   | 33335 | 0.000 | 1.000 | N/A   | 0.973 | 0.000 | N/A   | N/A   | 0.000 | 0.760 | 6.710  | 4.617  |
|        |      | Neural net (bagging) | 32425 | 0    | 904 | 6   | 33335 | 0.007 | 1.000 | 1.000 | 0.973 | 0.007 | 0.080 | 0.013 | 0.013 | 0.934 | 23.981 | 11.829 |
|        |      | Tree                 | 829   | 26   | 93  | 517 | 1465  | 0.848 | 0.970 | 0.952 | 0.919 | 0.817 | 0.834 | 0.897 | 0.830 | 0.970 | 2.402  | 2.402  |

|      |  |      |                      |       |      |     |     |       |       |       |       |       |       |       |       |       |       |        |        |
|------|--|------|----------------------|-------|------|-----|-----|-------|-------|-------|-------|-------|-------|-------|-------|-------|-------|--------|--------|
|      |  |      | Bagged forest        | 801   | 54   | 134 | 476 | 1465  | 0.780 | 0.937 | 0.898 | 0.872 | 0.717 | 0.736 | 0.835 | 0.731 | 0.920 | 2.402  | 2.374  |
|      |  |      | Random forest        | 771   | 84   | 114 | 496 | 1465  | 0.813 | 0.902 | 0.855 | 0.865 | 0.715 | 0.721 | 0.834 | 0.720 | 0.936 | 2.402  | 2.402  |
|      |  |      | Bayesian             | 625   | 230  | 122 | 488 | 1465  | 0.800 | 0.731 | 0.680 | 0.760 | 0.531 | 0.524 | 0.735 | 0.518 | 0.827 | 2.402  | 2.171  |
|      |  |      | SVM                  | 720   | 135  | 119 | 491 | 1465  | 0.805 | 0.842 | 0.784 | 0.827 | 0.647 | 0.645 | 0.794 | 0.645 | 0.895 | 2.230  | 2.237  |
|      |  |      | Logistic regression  | 807   | 48   | 431 | 179 | 1465  | 0.293 | 0.944 | 0.789 | 0.673 | 0.237 | 0.323 | 0.428 | 0.261 | 0.781 | 2.230  | 1.941  |
|      |  |      | Neural net           | 719   | 136  | 209 | 401 | 1465  | 0.657 | 0.841 | 0.747 | 0.765 | 0.498 | 0.510 | 0.699 | 0.507 | 0.831 | 2.402  | 2.303  |
|      |  |      | Neural net (bagging) | 855   | 0    | 0   | 610 | 1465  | 1.000 | 1.000 | 1.000 | 1.000 | 1.000 | 1.000 | 1.000 | 1.000 | 1.000 | 2.402  | 2.402  |
|      |  | 4CHO | Tree                 | 782   | 73   | 172 | 438 | 1465  | 0.718 | 0.915 | 0.857 | 0.833 | 0.633 | 0.654 | 0.781 | 0.648 | 0.931 | 2.402  | 2.402  |
|      |  |      | Bagged forest        | 794   | 61   | 146 | 464 | 1465  | 0.761 | 0.929 | 0.884 | 0.859 | 0.689 | 0.709 | 0.818 | 0.703 | 0.928 | 2.402  | 2.402  |
|      |  |      | Random forest        | 808   | 47   | 165 | 445 | 1465  | 0.730 | 0.945 | 0.904 | 0.855 | 0.675 | 0.704 | 0.808 | 0.694 | 0.929 | 2.402  | 2.402  |
|      |  |      | Bayesian             | 608   | 247  | 135 | 475 | 1465  | 0.779 | 0.711 | 0.658 | 0.739 | 0.490 | 0.483 | 0.713 | 0.477 | 0.832 | 2.402  | 2.369  |
|      |  |      | SVM                  | 734   | 121  | 141 | 469 | 1465  | 0.769 | 0.858 | 0.795 | 0.821 | 0.627 | 0.631 | 0.782 | 0.630 | 0.896 | 2.402  | 2.336  |
|      |  |      | Logistic regression  | 805   | 50   | 411 | 199 | 1465  | 0.326 | 0.942 | 0.799 | 0.685 | 0.268 | 0.351 | 0.463 | 0.293 | 0.770 | 2.402  | 2.336  |
|      |  |      | Neural net           | 744   | 111  | 232 | 378 | 1465  | 0.620 | 0.870 | 0.773 | 0.766 | 0.490 | 0.512 | 0.688 | 0.504 | 0.833 | 2.402  | 2.303  |
|      |  |      | Neural net (bagging) | 855   | 0    | 0   | 610 | 1465  | 1.000 | 1.000 | 1.000 | 1.000 | 1.000 | 1.000 | 1.000 | 1.000 | 1.000 | 2.402  | 2.402  |
| XIAP |  | 1TFT | Tree                 | 34425 | 103  | 263 | 530 | 35321 | 0.668 | 0.997 | 0.837 | 0.990 | 0.665 | 0.743 | 0.743 | 0.738 | 0.972 | 38.484 | 17.750 |
|      |  |      | Bagged forest        | 34385 | 143  | 237 | 556 | 35321 | 0.701 | 0.996 | 0.795 | 0.989 | 0.697 | 0.741 | 0.745 | 0.740 | 0.974 | 37.172 | 17.453 |
|      |  |      | Random forest        | 34509 | 19   | 206 | 587 | 35321 | 0.740 | 0.999 | 0.969 | 0.994 | 0.740 | 0.844 | 0.839 | 0.836 | 0.998 | 44.541 | 19.849 |
|      |  |      | Bayesian             | 29963 | 4565 | 21  | 772 | 35321 | 0.974 | 0.868 | 0.145 | 0.870 | 0.841 | 0.348 | 0.252 | 0.221 | 0.981 | 36.213 | 17.478 |
|      |  |      | SVM                  | 34479 | 49   | 99  | 694 | 35321 | 0.875 | 0.999 | 0.934 | 0.996 | 0.874 | 0.902 | 0.904 | 0.902 | 0.997 | 43.532 | 19.471 |
|      |  |      | Logistic regression  | 34514 | 14   | 683 | 110 | 35321 | 0.139 | 1.000 | 0.887 | 0.980 | 0.138 | 0.346 | 0.240 | 0.235 | 0.984 | 36.592 | 18.260 |
|      |  |      | Neural net           | 34462 | 66   | 159 | 634 | 35321 | 0.799 | 0.998 | 0.906 | 0.994 | 0.798 | 0.848 | 0.849 | 0.846 | 0.994 | 43.658 | 19.294 |
|      |  |      | Neural net (bagging) | 34524 | 4    | 8   | 785 | 35321 | 0.990 | 1.000 | 0.995 | 1.000 | 0.990 | 0.992 | 0.992 | 0.992 | 1.000 | 44.541 | 20.001 |
|      |  | 5C3H | Tree                 | 34409 | 119  | 214 | 579 | 35321 | 0.730 | 0.997 | 0.830 | 0.991 | 0.727 | 0.774 | 0.777 | 0.772 | 0.985 | 42.323 | 18.547 |
|      |  |      | Bagged forest        | 34357 | 171  | 208 | 585 | 35321 | 0.738 | 0.995 | 0.774 | 0.989 | 0.733 | 0.750 | 0.755 | 0.750 | 0.984 | 38.358 | 18.386 |
|      |  |      | Random forest        | 34509 | 19   | 221 | 572 | 35321 | 0.721 | 0.999 | 0.968 | 0.993 | 0.721 | 0.832 | 0.827 | 0.823 | 0.998 | 44.541 | 19.849 |
|      |  |      | Bayesian             | 32991 | 1537 | 85  | 708 | 35321 | 0.893 | 0.955 | 0.315 | 0.954 | 0.848 | 0.515 | 0.466 | 0.448 | 0.981 | 36.339 | 17.024 |
|      |  |      | SVM                  | 34476 | 52   | 104 | 689 | 35321 | 0.869 | 0.998 | 0.930 | 0.996 | 0.867 | 0.897 | 0.898 | 0.896 | 0.998 | 43.910 | 19.698 |
|      |  |      | Logistic regression  | 34513 | 15   | 670 | 123 | 35321 | 0.155 | 1.000 | 0.891 | 0.981 | 0.155 | 0.367 | 0.264 | 0.259 | 0.987 | 36.844 | 17.983 |

|       |      |                      |       |      |     |      |       |       |       |       |       |       |       |       |       |       |        |        |
|-------|------|----------------------|-------|------|-----|------|-------|-------|-------|-------|-------|-------|-------|-------|-------|-------|--------|--------|
|       |      | Neural net           | 34435 | 93   | 144 | 649  | 35321 | 0.818 | 0.997 | 0.875 | 0.993 | 0.816 | 0.843 | 0.846 | 0.842 | 0.997 | 43.532 | 19.673 |
|       |      | Neural net (bagging) | 34522 | 6    | 9   | 784  | 35321 | 0.989 | 1.000 | 0.992 | 1.000 | 0.988 | 0.990 | 0.991 | 0.990 | 1.000 | 44.541 | 20.001 |
| Mcl-1 | 5FC4 | Tree                 | 34065 | 82   | 856 | 139  | 35142 | 0.140 | 0.998 | 0.629 | 0.973 | 0.137 | 0.288 | 0.229 | 0.221 | 0.752 | 22.055 | 8.207  |
|       |      | Bagged forest        | 34074 | 73   | 862 | 133  | 35142 | 0.134 | 0.998 | 0.646 | 0.973 | 0.132 | 0.286 | 0.221 | 0.214 | 0.578 | 16.208 | 3.915  |
|       |      | Random forest        | 34144 | 3    | 822 | 173  | 35142 | 0.174 | 1.000 | 0.983 | 0.977 | 0.174 | 0.408 | 0.295 | 0.289 | 0.930 | 29.583 | 13.227 |
|       |      | Bayesian             | 31061 | 3086 | 493 | 502  | 35142 | 0.505 | 0.910 | 0.140 | 0.898 | 0.414 | 0.227 | 0.219 | 0.183 | 0.811 | 19.420 | 7.619  |
|       |      | SVM                  | 34082 | 65   | 712 | 283  | 35142 | 0.284 | 0.998 | 0.813 | 0.978 | 0.283 | 0.473 | 0.421 | 0.413 | 0.835 | 28.476 | 11.538 |
|       |      | Logistic regression  | 34144 | 3    | 989 | 6    | 35142 | 0.006 | 1.000 | 0.667 | 0.972 | 0.006 | 0.062 | 0.012 | 0.011 | 0.817 | 20.023 | 8.704  |
|       |      | Neural net           | 34145 | 2    | 984 | 11   | 35142 | 0.011 | 1.000 | 0.846 | 0.972 | 0.011 | 0.095 | 0.022 | 0.021 | 0.842 | 22.238 | 9.448  |
|       |      | Neural net (bagging) | 34138 | 9    | 743 | 252  | 35142 | 0.253 | 1.000 | 0.966 | 0.979 | 0.253 | 0.489 | 0.401 | 0.394 | 0.956 | 32.602 | 14.131 |
|       | 5MES | Tree                 | 34048 | 99   | 845 | 150  | 35142 | 0.151 | 0.997 | 0.602 | 0.973 | 0.148 | 0.292 | 0.241 | 0.232 | 0.780 | 21.735 | 9.548  |
|       |      | Bagged forest        | 34051 | 96   | 848 | 147  | 35142 | 0.148 | 0.997 | 0.605 | 0.973 | 0.145 | 0.290 | 0.237 | 0.229 | 0.583 | 17.077 | 4.082  |
|       |      | Random forest        | 34145 | 2    | 881 | 114  | 35142 | 0.115 | 1.000 | 0.983 | 0.975 | 0.115 | 0.331 | 0.205 | 0.200 | 0.921 | 27.269 | 12.463 |
|       |      | Bayesian             | 32781 | 1366 | 605 | 390  | 35142 | 0.392 | 0.960 | 0.222 | 0.944 | 0.352 | 0.268 | 0.284 | 0.257 | 0.819 | 20.125 | 7.840  |
|       |      | SVM                  | 34089 | 58   | 628 | 367  | 35142 | 0.369 | 0.998 | 0.864 | 0.980 | 0.367 | 0.557 | 0.517 | 0.509 | 0.877 | 31.897 | 13.428 |
|       |      | Logistic regression  | 34147 | 0    | 993 | 2    | 35142 | 0.002 | 1.000 | 1.000 | 0.972 | 0.002 | 0.044 | 0.004 | 0.004 | 0.817 | 18.213 | 8.583  |
|       |      | Neural net           | 34147 | 0    | 993 | 2    | 35142 | 0.002 | 1.000 | 1.000 | 0.972 | 0.002 | 0.044 | 0.004 | 0.004 | 0.843 | 21.835 | 9.548  |
|       |      | Neural net (bagging) | 34139 | 8    | 768 | 227  | 35142 | 0.228 | 1.000 | 0.966 | 0.978 | 0.228 | 0.464 | 0.369 | 0.362 | 0.957 | 31.998 | 14.393 |
| Mdm2  | 4ODF | Tree                 | 2941  | 99   | 229 | 1330 | 4599  | 0.853 | 0.967 | 0.931 | 0.929 | 0.821 | 0.839 | 0.890 | 0.838 | 0.943 | 2.950  | 2.950  |
|       |      | Bagged forest        | 2903  | 137  | 233 | 1326 | 4599  | 0.851 | 0.955 | 0.906 | 0.920 | 0.805 | 0.819 | 0.878 | 0.818 | 0.938 | 2.950  | 2.924  |
|       |      | Random forest        | 2972  | 68   | 266 | 1293 | 4599  | 0.829 | 0.978 | 0.950 | 0.927 | 0.807 | 0.837 | 0.886 | 0.833 | 0.977 | 2.950  | 2.950  |
|       |      | Bayesian             | 2656  | 384  | 198 | 1361 | 4599  | 0.873 | 0.874 | 0.780 | 0.873 | 0.747 | 0.728 | 0.824 | 0.726 | 0.932 | 2.950  | 2.937  |
|       |      | SVM                  | 2947  | 93   | 170 | 1389 | 4599  | 0.891 | 0.969 | 0.937 | 0.943 | 0.860 | 0.871 | 0.914 | 0.871 | 0.966 | 2.950  | 2.937  |
|       |      | Logistic regression  | 2931  | 109  | 369 | 1190 | 4599  | 0.763 | 0.964 | 0.916 | 0.896 | 0.727 | 0.765 | 0.833 | 0.758 | 0.942 | 2.884  | 2.924  |
|       |      | Neural net           | 2870  | 170  | 220 | 1339 | 4599  | 0.859 | 0.944 | 0.887 | 0.915 | 0.803 | 0.810 | 0.873 | 0.809 | 0.952 | 2.884  | 2.937  |
|       |      | Neural net (bagging) | 3029  | 11   | 60  | 1499 | 4599  | 0.962 | 0.996 | 0.993 | 0.985 | 0.958 | 0.966 | 0.977 | 0.965 | 0.999 | 2.949  | 2.950  |
|       | 4ZFI | Tree                 | 2941  | 99   | 255 | 1304 | 4599  | 0.836 | 0.967 | 0.929 | 0.923 | 0.804 | 0.826 | 0.880 | 0.824 | 0.952 | 2.950  | 2.950  |
|       |      | Bagged forest        | 2925  | 115  | 303 | 1256 | 4599  | 0.806 | 0.962 | 0.916 | 0.909 | 0.768 | 0.795 | 0.857 | 0.791 | 0.937 | 2.950  | 2.926  |
|       |      | Random forest        | 2987  | 53   | 297 | 1262 | 4599  | 0.809 | 0.983 | 0.960 | 0.924 | 0.792 | 0.830 | 0.878 | 0.823 | 0.977 | 2.950  | 2.950  |

|       |      |                      |       |     |     |      |       |       |       |       |       |       |       |       |       |       |        |        |
|-------|------|----------------------|-------|-----|-----|------|-------|-------|-------|-------|-------|-------|-------|-------|-------|-------|--------|--------|
| Menin |      | Bayesian             | 2671  | 369 | 249 | 1310 | 4599  | 0.840 | 0.879 | 0.780 | 0.866 | 0.719 | 0.707 | 0.809 | 0.706 | 0.926 | 2.950  | 2.950  |
|       |      | SVM                  | 2925  | 115 | 198 | 1361 | 4599  | 0.873 | 0.962 | 0.922 | 0.932 | 0.835 | 0.847 | 0.897 | 0.846 | 0.962 | 2.950  | 2.950  |
|       |      | Logistic regression  | 2942  | 98  | 327 | 1232 | 4599  | 0.790 | 0.968 | 0.926 | 0.908 | 0.758 | 0.791 | 0.853 | 0.786 | 0.942 | 2.950  | 2.950  |
|       |      | Neural net           | 2881  | 159 | 227 | 1332 | 4599  | 0.854 | 0.948 | 0.893 | 0.916 | 0.802 | 0.811 | 0.873 | 0.811 | 0.956 | 2.950  | 2.950  |
|       |      | Neural net (bagging) | 3034  | 6   | 56  | 1503 | 4599  | 0.964 | 0.998 | 0.996 | 0.987 | 0.962 | 0.970 | 0.980 | 0.970 | 0.999 | 2.950  | 2.950  |
|       | 5DB2 | Tree                 | 22020 | 0   | 491 | 0    | 22511 | 0.000 | 1.000 | N/A   | 0.978 | 0.000 | N/A   | N/A   | 0.000 | 0.500 | 1.000  | 1.000  |
|       |      | Bagged forest        | 22020 | 0   | 491 | 0    | 22511 | 0.000 | 1.000 | N/A   | 0.978 | 0.000 | N/A   | N/A   | 0.000 | 0.500 | 1.000  | 1.000  |
|       |      | Random forest        | 22020 | 0   | 491 | 0    | 22511 | 0.000 | 1.000 | N/A   | 0.978 | 0.000 | N/A   | N/A   | 0.000 | 0.823 | 14.060 | 6.928  |
|       |      | Bayesian             | 21903 | 117 | 448 | 43   | 22511 | 0.088 | 0.995 | 0.269 | 0.975 | 0.082 | 0.143 | 0.132 | 0.123 | 0.758 | 10.800 | 5.013  |
|       |      | SVM                  | 22017 | 3   | 333 | 158  | 22511 | 0.322 | 1.000 | 0.981 | 0.985 | 0.322 | 0.558 | 0.485 | 0.479 | 0.903 | 41.772 | 12.267 |
|       |      | Logistic regression  | 22020 | 0   | 491 | 0    | 22511 | 0.000 | 1.000 | N/A   | 0.978 | 0.000 | N/A   | N/A   | 0.000 | 0.662 | 6.928  | 3.790  |
|       |      | Neural net           | 22020 | 0   | 491 | 0    | 22511 | 0.000 | 1.000 | N/A   | 0.978 | 0.000 | N/A   | N/A   | 0.000 | 0.680 | 4.483  | 3.219  |
|       |      | Neural net (bagging) | 22020 | 0   | 491 | 0    | 22511 | 0.000 | 1.000 | N/A   | 0.978 | 0.000 | N/A   | N/A   | 0.000 | 0.969 | 34.640 | 15.242 |
|       | 6B41 | Tree                 | 22020 | 0   | 491 | 0    | 22511 | 0.000 | 1.000 | N/A   | 0.978 | 0.000 | N/A   | N/A   | 0.000 | 0.538 | 3.663  | 2.449  |
|       |      | Bagged forest        | 22020 | 0   | 491 | 0    | 22511 | 0.000 | 1.000 | N/A   | 0.978 | 0.000 | N/A   | N/A   | 0.000 | 0.500 | 1.000  | 1.000  |
|       |      | Random forest        | 22020 | 0   | 491 | 0    | 22511 | 0.000 | 1.000 | N/A   | 0.978 | 0.000 | N/A   | N/A   | 0.000 | 0.828 | 11.207 | 5.339  |
|       |      | Bayesian             | 21938 | 82  | 457 | 34   | 22511 | 0.069 | 0.996 | 0.293 | 0.976 | 0.066 | 0.134 | 0.112 | 0.105 | 0.760 | 9.781  | 4.809  |
|       |      | SVM                  | 22016 | 4   | 341 | 150  | 22511 | 0.305 | 1.000 | 0.974 | 0.985 | 0.305 | 0.541 | 0.465 | 0.459 | 0.897 | 42.179 | 11.900 |
|       |      | Logistic regression  | 22020 | 0   | 491 | 0    | 22511 | 0.000 | 1.000 | N/A   | 0.978 | 0.000 | N/A   | N/A   | 0.000 | 0.617 | 1.223  | 0.652  |
|       |      | Neural net           | 22020 | 0   | 491 | 0    | 22511 | 0.000 | 1.000 | N/A   | 0.978 | 0.000 | N/A   | N/A   | 0.000 | 0.679 | 3.668  | 2.527  |
|       |      | Neural net (bagging) | 22020 | 0   | 491 | 0    | 22511 | 0.000 | 1.000 | N/A   | 0.978 | 0.000 | N/A   | N/A   | 0.000 | 0.971 | 37.085 | 16.342 |



**Table S8:** External Statistics for the machine learning models attained on 10 PPI targets and the corresponding protein structures. The best value(s) corresponding to each target protein (across rows) is shown in bold and highlighted in green.

| Target | PDB ID   | External statistics | Tree         | Bagged forest | Random forest | Bayesian     | SVM          | Logistic regression | Neural net   | Neural net (bagging) |
|--------|----------|---------------------|--------------|---------------|---------------|--------------|--------------|---------------------|--------------|----------------------|
| BAZ2B  | 4XUA     | ROC score           | 0.534        | 0.5           | 0.537         | 0.53         | 0.521        | 0.532               | 0.53         | <b>0.54</b>          |
|        |          | Sensitivity         | 0            | 0             | 0             | 0.002        | <b>0.047</b> | 0                   | 0            | 0                    |
|        |          | Specificity         | <b>1.000</b> | <b>1.000</b>  | <b>1.000</b>  | 0.997        | 0.974        | <b>1.000</b>        | <b>1.000</b> | <b>1.000</b>         |
|        |          | Precision           | N/A          | N/A           | N/A           | 0.116        | <b>0.204</b> | 0                   | N/A          | N/A                  |
|        |          | Concordance         | <b>0.878</b> | <b>0.878</b>  | <b>0.878</b>  | 0.876        | 0.862        | <b>0.878</b>        | <b>0.878</b> | <b>0.878</b>         |
|        | 5.00E+73 | ROC score           | 0.524        | 0.5           | 0.546         | 0.525        | 0.54         | 0.52                | 0.538        | <b>0.553</b>         |
|        |          | Sensitivity         | 0            | 0             | 0             | 0.006        | <b>0.057</b> | 0                   | 0            | 0                    |
|        |          | Specificity         | <b>1.000</b> | <b>1.000</b>  | <b>1.000</b>  | 0.995        | 0.97         | <b>1.000</b>        | <b>1.000</b> | <b>1.000</b>         |
|        |          | Precision           | N/A          | N/A           | N/A           | 0.141        | <b>0.206</b> | N/A                 | N/A          | N/A                  |
|        |          | Concordance         | <b>0.878</b> | <b>0.878</b>  | <b>0.878</b>  | 0.874        | 0.858        | <b>0.878</b>        | <b>0.878</b> | <b>0.878</b>         |
| Bcl-2  | 2021     | ROC score           | 0.966        | 0.949         | <b>0.987</b>  | 0.978        | 0.979        | 0.972               | 0.981        | 0.985                |
|        |          | Sensitivity         | 0.868        | 0.893         | 0.894         | <b>0.906</b> | 0.896        | 0.661               | 0.851        | 0.896                |
|        |          | Specificity         | <b>0.999</b> | <b>0.998</b>  | <b>0.999</b>  | 0.985        | <b>0.999</b> | <b>0.999</b>        | <b>0.999</b> | <b>0.999</b>         |
|        |          | Precision           | 0.966        | 0.939         | 0.976         | 0.681        | 0.956        | 0.978               | 0.964        | <b>0.981</b>         |
|        |          | Concordance         | 0.994        | 0.994         | 0.995         | 0.982        | 0.995        | 0.988               | 0.994        | <b>0.996</b>         |
|        | 4LVT     | ROC score           | 0.948        | 0.948         | <b>0.992</b>  | 0.982        | 0.976        | 0.974               | 0.988        | 0.991                |
|        |          | Sensitivity         | 0.861        | 0.879         | 0.878         | 0.895        | <b>0.898</b> | 0.612               | 0.872        | <b>0.898</b>         |
|        |          | Specificity         | 0.999        | 0.998         | 0.999         | 0.986        | 0.998        | <b>1.000</b>        | 0.999        | 0.999                |
|        |          | Precision           | 0.968        | 0.949         | 0.969         | 0.704        | 0.95         | <b>0.982</b>        | 0.955        | 0.962                |
|        |          | Concordance         | 0.994        | 0.994         | <b>0.995</b>  | 0.983        | <b>0.995</b> | 0.986               | 0.994        | <b>0.995</b>         |
| Bcl-xL | 3INQ     | ROC score           | 0.964        | 0.91          | 0.989         | 0.982        | 0.983        | 0.985               | <b>0.99</b>  | 0.986                |
|        |          | Sensitivity         | 0.772        | 0.792         | 0.765         | <b>0.889</b> | 0.865        | 0.249               | 0.792        | 0.824                |
|        |          | Specificity         | 0.998        | 0.997         | 0.999         | 0.982        | 0.999        | <b>1.000</b>        | 0.999        | 0.999                |
|        |          | Precision           | 0.896        | 0.854         | 0.94          | 0.491        | 0.923        | 0.923               | 0.935        | <b>0.944</b>         |
|        |          | Concordance         | 0.994        | 0.993         | 0.995         | 0.98         | <b>0.996</b> | 0.985               | 0.995        | <b>0.996</b>         |
|        | 3WIZ     | ROC score           | 0.979        | 0.916         | 0.989         | 0.975        | 0.981        | 0.986               | 0.988        | <b>0.993</b>         |
|        |          | Sensitivity         | 0.782        | 0.799         | 0.817         | <b>0.931</b> | 0.875        | 0.145               | 0.817        | 0.858                |
|        |          | Specificity         | <b>1.000</b> | 0.998         | <b>1.000</b>  | 0.901        | 0.991        | <b>1.000</b>        | 0.999        | 0.999                |
|        |          | Precision           | <b>0.983</b> | 0.906         | 0.971         | 0.156        | 0.661        | 0.875               | 0.959        | 0.969                |
|        |          | Concordance         | 0.996        | 0.995         | 0.996         | 0.902        | 0.989        | 0.983               | 0.996        | <b>0.997</b>         |
| BRD4-1 | 5D3L     | ROC score           | <b>0.926</b> | <b>0.926</b>  | 0.918         | 0.897        | 0.915        | 0.893               | 0.917        | 0.918                |
|        |          | Sensitivity         | 0.826        | 0.83          | 0.818         | 0.834        | <b>0.846</b> | 0.779               | 0.842        | <b>0.846</b>         |
|        |          | Specificity         | 0.881        | <b>0.891</b>  | 0.861         | 0.823        | 0.854        | 0.874               | 0.854        | 0.861                |
|        |          | Precision           | 0.857        | <b>0.868</b>  | 0.835         | 0.802        | 0.833        | 0.842               | 0.832        | 0.839                |
|        |          | Concordance         | 0.856        | <b>0.863</b>  | 0.841         | 0.828        | 0.85         | 0.83                | 0.848        | 0.854                |

|        |      |             |              |              |              |              |              |              |              |              |
|--------|------|-------------|--------------|--------------|--------------|--------------|--------------|--------------|--------------|--------------|
|        | 5KU3 | ROC score   | 0.901        | 0.901        | 0.911        | 0.886        | 0.908        | 0.887        | 0.906        | <b>0.927</b> |
|        |      | Sensitivity | 0.87         | 0.858        | 0.881        | <b>0.889</b> | 0.866        | 0.794        | 0.866        | 0.866        |
|        |      | Specificity | 0.786        | 0.796        | 0.741        | 0.752        | 0.806        | 0.847        | 0.789        | <b>0.854</b> |
|        |      | Precision   | 0.777        | 0.783        | 0.746        | 0.755        | 0.793        | 0.817        | 0.779        | <b>0.836</b> |
|        |      | Concordance | 0.824        | 0.824        | 0.806        | 0.815        | 0.834        | 0.823        | 0.824        | <b>0.859</b> |
| CREBBP | 5EIC | ROC score   | 0.631        | 0.5          | 0.769        | 0.726        | 0.724        | 0.744        | 0.75         | <b>0.772</b> |
|        |      | Sensitivity | 0            | 0            | 0            | <b>0.205</b> | 0.179        | 0            | 0            | 0.003        |
|        |      | Specificity | <b>1.000</b> | <b>1.000</b> | <b>1.000</b> | 0.958        | 0.98         | <b>1.000</b> | <b>1.000</b> | <b>1.000</b> |
|        |      | Precision   | N/A          | N/A          | N/A          | 0.12         | 0.203        | N/A          | N/A          | <b>1.000</b> |
|        |      | Concordance | <b>0.973</b> | <b>0.973</b> | <b>0.973</b> | 0.937        | 0.958        | <b>0.973</b> | <b>0.973</b> | <b>0.973</b> |
|        | 5MMG | ROC score   | 0.689        | 0.5          | 0.691        | 0.712        | 0.732        | 0.721        | 0.746        | <b>0.788</b> |
|        |      | Sensitivity | 0            | 0            | 0            | <b>0.279</b> | 0.162        | 0            | 0            | 0.003        |
|        |      | Specificity | <b>1.000</b> | <b>1.000</b> | <b>1.000</b> | 0.916        | 0.976        | <b>1.000</b> | <b>1.000</b> | <b>1.000</b> |
|        |      | Precision   | N/A          | N/A          | N/A          | 0.086        | 0.157        | N/A          | N/A          | <b>1.000</b> |
|        |      | Concordance | <b>0.973</b> | <b>0.973</b> | <b>0.973</b> | 0.899        | 0.953        | <b>0.973</b> | <b>0.973</b> | <b>0.973</b> |
| HIV IN | 4CFD | ROC score   | 0.822        | 0.827        | 0.801        | 0.74         | 0.805        | 0.742        | 0.784        | <b>0.832</b> |
|        |      | Sensitivity | 0.598        | 0.613        | 0.632        | 0.667        | <b>0.713</b> | 0.261        | 0.567        | <b>0.713</b> |
|        |      | Specificity | 0.863        | 0.869        | 0.806        | 0.678        | 0.779        | <b>0.934</b> | 0.822        | 0.822        |
|        |      | Precision   | 0.757        | <b>0.769</b> | 0.699        | 0.596        | 0.697        | 0.739        | 0.695        | 0.741        |
|        |      | Concordance | 0.753        | 0.762        | 0.734        | 0.673        | 0.751        | 0.654        | 0.716        | <b>0.777</b> |
|        | 4CHO | ROC score   | 0.792        | 0.807        | 0.791        | 0.73         | 0.816        | 0.714        | 0.753        | <b>0.824</b> |
|        |      | Sensitivity | 0.544        | 0.579        | 0.544        | 0.663        | 0.655        | 0.261        | 0.506        | <b>0.67</b>  |
|        |      | Specificity | 0.828        | 0.861        | 0.831        | 0.683        | 0.811        | <b>0.915</b> | 0.809        | 0.817        |
|        |      | Precision   | 0.693        | <b>0.748</b> | 0.696        | 0.599        | 0.713        | 0.687        | 0.653        | 0.723        |
|        |      | Concordance | 0.71         | 0.743        | 0.711        | 0.675        | 0.746        | 0.643        | 0.683        | <b>0.756</b> |
| XIAP   | 1TFT | ROC score   | 0.97         | 0.972        | 0.996        | 0.979        | 0.99         | 0.981        | 0.994        | <b>0.997</b> |
|        |      | Sensitivity | 0.644        | 0.674        | 0.626        | <b>0.962</b> | 0.782        | 0.162        | 0.762        | 0.838        |
|        |      | Specificity | 0.997        | 0.995        | 0.999        | 0.866        | 0.997        | <b>1.000</b> | 0.998        | 0.999        |
|        |      | Precision   | 0.836        | 0.774        | 0.926        | 0.142        | 0.864        | <b>0.948</b> | 0.912        | 0.928        |
|        |      | Concordance | 0.989        | 0.988        | 0.99         | 0.869        | 0.992        | 0.981        | 0.993        | <b>0.995</b> |
|        | 5C3H | ROC score   | 0.973        | 0.976        | 0.994        | 0.974        | 0.994        | 0.985        | <b>0.995</b> | <b>0.995</b> |
|        |      | Sensitivity | 0.709        | 0.718        | 0.571        | <b>0.862</b> | 0.788        | 0.141        | 0.776        | <b>0.862</b> |
|        |      | Specificity | 0.995        | 0.994        | 0.999        | 0.952        | 0.996        | <b>1.000</b> | 0.997        | 0.997        |
|        |      | Precision   | 0.777        | 0.744        | 0.907        | 0.292        | 0.838        | <b>0.96</b>  | 0.86         | 0.888        |
|        |      | Concordance | 0.989        | 0.988        | 0.989        | 0.95         | 0.992        | 0.981        | 0.992        | <b>0.994</b> |
| Mcl-1  | 5FC4 | ROC score   | 0.742        | 0.586        | 0.854        | 0.783        | 0.776        | 0.813        | 0.843        | <b>0.859</b> |
|        |      | Sensitivity | 0.141        | 0.131        | 0.127        | <b>0.458</b> | 0.23         | 0.005        | 0.005        | 0.167        |
|        |      | Specificity | 0.997        | 0.998        | <b>1.000</b> | 0.907        | 0.997        | <b>1.000</b> | <b>1.000</b> | 0.999        |
|        |      | Precision   | 0.6          | 0.609        | <b>0.947</b> | 0.125        | 0.671        | 0.5          | 0.667        | 0.78         |
|        |      | Concordance | 0.973        | 0.973        | <b>0.975</b> | 0.894        | <b>0.975</b> | 0.972        | 0.972        | <b>0.975</b> |
|        | 5MES | ROC score   | 0.755        | 0.573        | 0.845        | 0.786        | 0.715        | 0.809        | 0.835        | <b>0.846</b> |
|        |      | Sensitivity | 0.138        | 0.134        | 0.073        | <b>0.359</b> | 0.258        | 0            | 0            | 0.148        |
|        |      | Specificity | 0.997        | 0.997        | <b>1.000</b> | 0.957        | 0.994        | <b>1.000</b> | <b>1.000</b> | 0.999        |
|        |      | Precision   | 0.578        | 0.576        | <b>0.939</b> | 0.196        | 0.547        | N/A          | 0            | 0.797        |

|       |      |             |              |              |              |              |              |              |              |              |
|-------|------|-------------|--------------|--------------|--------------|--------------|--------------|--------------|--------------|--------------|
|       |      | Concordance | 0.973        | 0.973        | 0.974        | 0.94         | 0.973        | 0.972        | 0.972        | <b>0.975</b> |
| Mdm2  | 4ODF | ROC score   | 0.947        | 0.947        | 0.958        | 0.922        | 0.957        | 0.946        | 0.95         | <b>0.963</b> |
|       |      | Sensitivity | 0.84         | 0.849        | 0.801        | 0.867        | <b>0.891</b> | 0.765        | 0.861        | 0.879        |
|       |      | Specificity | 0.968        | 0.951        | <b>0.975</b> | 0.853        | 0.952        | 0.97         | 0.943        | 0.961        |
|       |      | Precision   | 0.93         | 0.899        | <b>0.944</b> | 0.751        | 0.904        | 0.929        | 0.886        | 0.92         |
|       |      | Concordance | 0.924        | 0.916        | 0.916        | 0.857        | 0.931        | 0.901        | 0.915        | <b>0.933</b> |
|       | 4ZFI | ROC score   | 0.941        | 0.94         | 0.949        | 0.919        | 0.954        | 0.943        | 0.951        | <b>0.961</b> |
|       |      | Sensitivity | 0.847        | 0.825        | 0.798        | 0.847        | 0.888        | 0.798        | 0.88         | <b>0.889</b> |
|       |      | Specificity | 0.951        | 0.957        | <b>0.965</b> | 0.875        | 0.952        | 0.954        | 0.94         | 0.955        |
|       |      | Precision   | 0.898        | 0.908        | <b>0.922</b> | 0.776        | 0.904        | 0.899        | 0.883        | 0.91         |
|       |      | Concordance | 0.916        | 0.912        | 0.909        | 0.866        | 0.93         | 0.901        | 0.92         | <b>0.933</b> |
| Menin | 5DB2 | ROC score   | 0.5          | 0.5          | <b>0.674</b> | 0.622        | 0.614        | 0.62         | 0.646        | 0.646        |
|       |      | Sensitivity | 0            | 0            | 0            | 0.033        | <b>0.071</b> | 0            | 0            | 0            |
|       |      | Specificity | <b>1.000</b> | <b>1.000</b> | <b>1.000</b> | 0.994        | 0.982        | <b>1.000</b> | <b>1.000</b> | <b>1.000</b> |
|       |      | Precision   | N/A          | N/A          | N/A          | <b>0.117</b> | 0.083        | N/A          | N/A          | N/A          |
|       |      | Concordance | <b>0.978</b> | <b>0.978</b> | <b>0.978</b> | 0.973        | 0.962        | <b>0.978</b> | <b>0.978</b> | <b>0.978</b> |
|       | 6B41 | ROC score   | 0.536        | 0.5          | <b>0.669</b> | 0.601        | 0.608        | 0.633        | 0.656        | 0.637        |
|       |      | Sensitivity | 0            | 0            | 0            | 0.009        | <b>0.076</b> | 0            | 0            | 0            |
|       |      | Specificity | <b>1.000</b> | <b>1.000</b> | <b>1.000</b> | 0.994        | 0.983        | <b>1.000</b> | <b>1.000</b> | <b>1.000</b> |
|       |      | Precision   | N/A          | N/A          | N/A          | 0.037        | <b>0.09</b>  | N/A          | N/A          | N/A          |
|       |      | Concordance | <b>0.978</b> | <b>0.978</b> | <b>0.978</b> | 0.973        | 0.963        | <b>0.978</b> | <b>0.978</b> | <b>0.978</b> |

**Table S9.** Confusion matrices generated when the machine learning models were applied to the test sets of the different PPI targets.

| Target | PDB ID | ML techniques        | TN    | FP  | FN   | TP  | Total |
|--------|--------|----------------------|-------|-----|------|-----|-------|
| BAZ2B  | 4XUA   | Tree                 | 14827 | 0   | 2055 | 0   | 16882 |
|        |        | Bagged forest        | 14827 | 0   | 2055 | 0   | 16882 |
|        |        | Random forest        | 14827 | 0   | 2055 | 0   | 16882 |
|        |        | Bayesian             | 14789 | 38  | 2050 | 5   | 16882 |
|        |        | SVM                  | 14448 | 379 | 1958 | 97  | 16882 |
|        |        | Logistic regression  | 14825 | 2   | 2055 | 0   | 16882 |
|        |        | Neural net           | 14827 | 0   | 2055 | 0   | 16882 |
|        |        | Neural net (bagging) | 14827 | 0   | 2055 | 0   | 16882 |
|        | 5E73   | Tree                 | 14827 | 0   | 2055 | 0   | 16882 |
|        |        | Bagged forest        | 14827 | 0   | 2055 | 0   | 16882 |
|        |        | Random forest        | 14827 | 0   | 2055 | 0   | 16882 |
|        |        | Bayesian             | 14748 | 79  | 2042 | 13  | 16882 |
|        |        | SVM                  | 14376 | 451 | 1938 | 117 | 16882 |
|        |        | Logistic regression  | 14827 | 0   | 2055 | 0   | 16882 |
|        |        | Neural net           | 14827 | 0   | 2055 | 0   | 16882 |
|        |        | Neural net (bagging) | 14827 | 0   | 2055 | 0   | 16882 |
| Bcl-2  | 2021   | Tree                 | 14702 | 16  | 70   | 461 | 15249 |

|        |      |                      |       |      |     |     |       |
|--------|------|----------------------|-------|------|-----|-----|-------|
|        |      | Bagged forest        | 14687 | 31   | 57  | 474 | 15249 |
|        |      | Random forest        | 14704 | 14   | 67  | 564 | 15349 |
|        |      | Bayesian             | 14493 | 225  | 50  | 481 | 15249 |
|        |      | SVM                  | 14696 | 22   | 55  | 476 | 15249 |
|        |      | Logistic regression  | 14710 | 8    | 180 | 351 | 15249 |
|        |      | Neural net           | 14701 | 17   | 79  | 452 | 15249 |
|        |      | Neural net (bagging) | 14709 | 9    | 55  | 476 | 15249 |
|        | 4LVT | Tree                 | 14703 | 15   | 74  | 457 | 15249 |
|        |      | Bagged forest        | 14693 | 25   | 64  | 467 | 15249 |
|        |      | Random forest        | 14703 | 15   | 65  | 466 | 15249 |
|        |      | Bayesian             | 14518 | 200  | 56  | 475 | 15249 |
|        |      | SVM                  | 14693 | 25   | 54  | 477 | 15249 |
|        |      | Logistic regression  | 14712 | 6    | 206 | 325 | 15249 |
|        |      | Neural net           | 14696 | 22   | 68  | 463 | 15249 |
|        |      | Neural net (bagging) | 14699 | 19   | 54  | 477 | 15249 |
| Bcl-xL | 3INQ | Tree                 | 14725 | 26   | 66  | 223 | 15040 |
|        |      | Bagged forest        | 14712 | 39   | 60  | 229 | 15040 |
|        |      | Random forest        | 14737 | 14   | 68  | 221 | 15040 |
|        |      | Bayesian             | 14485 | 266  | 32  | 257 | 15040 |
|        |      | SVM                  | 14730 | 21   | 39  | 250 | 15040 |
|        |      | Logistic regression  | 14745 | 6    | 217 | 72  | 15040 |
|        |      | Neural net           | 14735 | 16   | 60  | 229 | 15040 |
|        |      | Neural net (bagging) | 14737 | 14   | 51  | 238 | 15040 |
|        | 3WIZ | Tree                 | 14747 | 4    | 63  | 226 | 15040 |
|        |      | Bagged forest        | 14727 | 24   | 58  | 231 | 15040 |
|        |      | Random forest        | 14744 | 7    | 53  | 236 | 15040 |
|        |      | Bayesian             | 13295 | 1456 | 20  | 269 | 15040 |
|        |      | SVM                  | 14621 | 130  | 36  | 253 | 15040 |
|        |      | Logistic regression  | 14745 | 6    | 247 | 42  | 15040 |
|        |      | Neural net           | 14741 | 10   | 53  | 236 | 15040 |
|        |      | Neural net (bagging) | 14743 | 8    | 41  | 248 | 15040 |
| BRD4-1 | 5D3L | Tree                 | 259   | 35   | 44  | 209 | 547   |
|        |      | Bagged forest        | 262   | 32   | 43  | 210 | 547   |
|        |      | Random forest        | 253   | 41   | 46  | 207 | 547   |
|        |      | Bayesian             | 242   | 52   | 42  | 211 | 547   |
|        |      | SVM                  | 251   | 43   | 39  | 214 | 547   |
|        |      | Logistic regression  | 257   | 37   | 56  | 197 | 547   |
|        |      | Neural net           | 251   | 43   | 40  | 213 | 547   |
|        |      | Neural net (bagging) | 253   | 41   | 39  | 214 | 547   |
|        | 5KU3 | Tree                 | 231   | 63   | 33  | 220 | 547   |
|        |      | Bagged forest        | 234   | 60   | 36  | 217 | 547   |
|        |      | Random forest        | 218   | 76   | 30  | 223 | 547   |
|        |      | Bayesian             | 221   | 73   | 28  | 225 | 547   |

|        |      |                      |       |      |     |     |       |
|--------|------|----------------------|-------|------|-----|-----|-------|
|        |      | SVM                  | 237   | 57   | 34  | 219 | 547   |
|        |      | Logistic regression  | 249   | 45   | 52  | 201 | 547   |
|        |      | Neural net           | 232   | 62   | 34  | 219 | 547   |
|        |      | Neural net (bagging) | 251   | 43   | 34  | 219 | 547   |
| CREBBP | 5EIC | Tree                 | 13896 | 0    | 390 | 0   | 14286 |
|        |      | Bagged forest        | 13896 | 0    | 390 | 0   | 14286 |
|        |      | Random forest        | 13896 | 0    | 390 | 0   | 14286 |
|        |      | Bayesian             | 13311 | 585  | 310 | 80  | 14286 |
|        |      | SVM                  | 13621 | 275  | 320 | 70  | 14286 |
|        |      | Logistic regression  | 13896 | 0    | 390 | 0   | 14286 |
|        |      | Neural net           | 13896 | 0    | 390 | 0   | 14286 |
|        |      | Neural net (bagging) | 13896 | 0    | 389 | 1   | 14286 |
|        | 5MMG | Tree                 | 13897 | 0    | 390 | 0   | 14287 |
|        |      | Bagged forest        | 13897 | 0    | 390 | 0   | 14287 |
|        |      | Random forest        | 13896 | 0    | 390 | 0   | 14286 |
|        |      | Bayesian             | 12736 | 1161 | 281 | 109 | 14287 |
|        |      | SVM                  | 13559 | 338  | 327 | 63  | 14287 |
|        |      | Logistic regression  | 13897 | 0    | 390 | 0   | 14287 |
|        |      | Neural net           | 13897 | 0    | 390 | 0   | 14287 |
|        |      | Neural net (bagging) | 13897 | 0    | 389 | 1   | 14287 |
| HIV IN | 4CFD | Tree                 | 316   | 50   | 105 | 156 | 627   |
|        |      | Bagged forest        | 318   | 48   | 101 | 160 | 627   |
|        |      | Random forest        | 295   | 71   | 96  | 165 | 627   |
|        |      | Bayesian             | 248   | 118  | 87  | 174 | 627   |
|        |      | SVM                  | 285   | 81   | 75  | 186 | 627   |
|        |      | Logistic regression  | 342   | 24   | 193 | 68  | 627   |
|        |      | Neural net           | 301   | 65   | 113 | 148 | 627   |
|        |      | Neural net (bagging) | 301   | 65   | 75  | 186 | 627   |
|        | 4CHO | Tree                 | 303   | 63   | 119 | 142 | 627   |
|        |      | Bagged forest        | 315   | 51   | 110 | 151 | 627   |
|        |      | Random forest        | 304   | 62   | 119 | 142 | 627   |
|        |      | Bayesian             | 250   | 116  | 88  | 173 | 627   |
|        |      | SVM                  | 297   | 69   | 90  | 171 | 627   |
|        |      | Logistic regression  | 335   | 31   | 193 | 68  | 627   |
|        |      | Neural net           | 296   | 70   | 129 | 132 | 627   |
|        |      | Neural net (bagging) | 299   | 67   | 86  | 175 | 627   |
| XIAP   | 1TFT | Tree                 | 14755 | 43   | 121 | 219 | 15138 |
|        |      | Bagged forest        | 14731 | 67   | 111 | 229 | 15138 |
|        |      | Random forest        | 14781 | 17   | 127 | 213 | 15138 |
|        |      | Bayesian             | 12821 | 1977 | 13  | 327 | 15138 |
|        |      | SVM                  | 14756 | 42   | 74  | 266 | 15138 |
|        |      | Logistic regression  | 14795 | 3    | 285 | 55  | 15138 |
|        |      | Neural net           | 14773 | 25   | 81  | 259 | 15138 |

|       |      |                      |       |      |     |     |       |
|-------|------|----------------------|-------|------|-----|-----|-------|
|       |      | Neural net (bagging) | 14776 | 22   | 55  | 285 | 15138 |
|       |      | Tree                 | 14729 | 69   | 99  | 241 | 15138 |
|       |      | Bagged forest        | 14714 | 84   | 96  | 244 | 15138 |
|       |      | Random forest        | 14778 | 20   | 146 | 194 | 15138 |
|       |      | Bayesian             | 14088 | 710  | 47  | 293 | 15138 |
|       |      | SVM                  | 14746 | 52   | 72  | 268 | 15138 |
|       |      | Logistic regression  | 14796 | 2    | 292 | 48  | 15138 |
|       |      | Neural net           | 14755 | 43   | 76  | 264 | 15138 |
|       |      | Neural net (bagging) | 14761 | 37   | 47  | 293 | 15138 |
| Mcl-1 | 5FC4 | Tree                 | 14595 | 40   | 366 | 60  | 15061 |
|       |      | Bagged forest        | 14599 | 36   | 370 | 56  | 15061 |
|       |      | Random forest        | 14632 | 3    | 372 | 54  | 15061 |
|       |      | Bayesian             | 13273 | 1362 | 231 | 195 | 15061 |
|       |      | SVM                  | 14587 | 48   | 328 | 98  | 15061 |
|       |      | Logistic regression  | 14633 | 2    | 424 | 2   | 15061 |
|       |      | Neural net           | 14634 | 1    | 424 | 2   | 15061 |
|       |      | Neural net (bagging) | 14615 | 20   | 355 | 71  | 15061 |
|       | 5MES | Tree                 | 14592 | 43   | 367 | 59  | 15061 |
|       |      | Bagged forest        | 14593 | 42   | 369 | 57  | 15061 |
|       |      | Random forest        | 14633 | 2    | 395 | 31  | 15061 |
|       |      | Bayesian             | 14009 | 626  | 273 | 153 | 15061 |
|       |      | SVM                  | 14544 | 91   | 316 | 110 | 15061 |
|       |      | Logistic regression  | 14635 | 0    | 426 | 0   | 15061 |
|       |      | Neural net           | 14634 | 1    | 426 | 0   | 15061 |
|       |      | Neural net (bagging) | 14619 | 16   | 363 | 63  | 15061 |
| Mdm2  | 4ODF | Tree                 | 1261  | 42   | 107 | 561 | 1971  |
|       |      | Bagged forest        | 1239  | 64   | 101 | 567 | 1971  |
|       |      | Random forest        | 1271  | 32   | 133 | 535 | 1971  |
|       |      | Bayesian             | 1111  | 192  | 89  | 579 | 1971  |
|       |      | SVM                  | 1240  | 63   | 73  | 595 | 1971  |
|       |      | Logistic regression  | 1264  | 39   | 157 | 511 | 1971  |
|       |      | Neural net           | 1229  | 74   | 93  | 575 | 1971  |
|       |      | Neural net (bagging) | 1252  | 51   | 81  | 587 | 1971  |
|       | 4ZFI | Tree                 | 1239  | 64   | 102 | 566 | 1971  |
|       |      | Bagged forest        | 1247  | 56   | 117 | 551 | 1971  |
|       |      | Random forest        | 1258  | 45   | 135 | 533 | 1971  |
|       |      | Bayesian             | 1140  | 163  | 102 | 566 | 1971  |
|       |      | SVM                  | 1240  | 63   | 75  | 593 | 1971  |
|       |      | Logistic regression  | 1243  | 60   | 135 | 533 | 1971  |
|       |      | Neural net           | 1225  | 78   | 80  | 588 | 1971  |
|       |      | Neural net (bagging) | 1244  | 59   | 74  | 594 | 1971  |
| Menin | 5DB2 | Tree                 | 9437  | 0    | 211 | 0   | 9648  |



|  |      |                      |      |     |     |    |      |
|--|------|----------------------|------|-----|-----|----|------|
|  |      | Bagged forest        | 9437 | 0   | 211 | 0  | 9648 |
|  |      | Random forest        | 9437 | 0   | 211 | 0  | 9648 |
|  |      | Bayesian             | 9384 | 53  | 204 | 7  | 9648 |
|  |      | SVM                  | 9271 | 166 | 196 | 15 | 9648 |
|  |      | Logistic regression  | 9437 | 0   | 211 | 0  | 9648 |
|  |      | Neural net           | 9437 | 0   | 211 | 0  | 9648 |
|  |      | Neural net (bagging) | 9437 | 0   | 211 | 0  | 9648 |
|  | 6B41 | Tree                 | 9437 | 0   | 211 | 0  | 9648 |
|  |      | Bagged forest        | 9437 | 0   | 211 | 0  | 9648 |
|  |      | Random forest        | 9437 | 0   | 211 | 0  | 9648 |
|  |      | Bayesian             | 9385 | 52  | 209 | 2  | 9648 |
|  |      | SVM                  | 9276 | 161 | 195 | 16 | 9648 |
|  |      | Logistic regression  | 9437 | 0   | 211 | 0  | 9648 |
|  |      | Neural net           | 9437 | 0   | 211 | 0  | 9648 |
|  |      | Neural net (bagging) | 9437 | 0   | 211 | 0  | 9648 |

**Table S10.** External enrichment factors (EF1% and EF5%) for the machine learning models for the different PPI targets. The best enrichment score(s) corresponding to each target protein (across rows) is shown in bold and highlighted in green.

| Target | PDB ID | Enrichment factors | Tree         | Bagged forest | Random forest | Bayesian      | SVM           | Logistic regression | Neural net    | Neural net (bagging) |
|--------|--------|--------------------|--------------|---------------|---------------|---------------|---------------|---------------------|---------------|----------------------|
| BAZ2B  | 4XUA   | EF 1%              | 1.706        | 1.000         | 1.565         | 1.222         | 1.907         | 1.271               | 1.467         | <b>2.005</b>         |
|        |        | EF 5%              | <b>1.526</b> | 1.000         | 1.431         | 1.265         | 1.518         | 1.236               | 1.256         | 1.479                |
|        | 5E73   | EF 1%              | 1.530        | 1.000         | 1.956         | 1.320         | <b>2.200</b>  | 0.880               | 1.467         | 1.858                |
|        |        | EF 5%              | 1.397        | 1.000         | 1.450         | 1.139         | <b>1.489</b>  | 1.119               | 1.363         | <b>1.489</b>         |
| Bcl-2  | 2021   | EF 1%              | 28.459       | 27.752        | <b>28.718</b> | 28.602        | <b>28.718</b> | 27.584              | <b>28.718</b> | <b>28.718</b>        |
|        |        | EF 5%              | 18.399       | 18.048        | <b>19.107</b> | 18.241        | 18.730        | 18.278              | 18.806        | 18.844               |
|        | 4LVT   | EF 1%              | 28.583       | 27.736        | <b>28.718</b> | <b>28.718</b> | <b>28.718</b> | 28.151              | <b>28.718</b> | <b>28.718</b>        |
|        |        | EF 5%              | 17.970       | 17.974        | 18.806        | 18.090        | 18.730        | 18.165              | 18.693        | <b>18.957</b>        |
| Bcl-xL | 3INQ   | EF 1%              | 49.757       | 45.272        | 51.695        | 49.960        | 51.348        | 48.225              | 51.695        | <b>52.042</b>        |
|        |        | EF 5%              | 18.033       | 16.581        | <b>18.893</b> | 18.408        | <b>18.893</b> | 18.547              | 18.824        | 18.824               |
|        | 3WIZ   | EF 1%              | 51.794       | 47.425        | <b>52.042</b> | 49.960        | 50.654        | 48.572              | <b>52.042</b> | <b>52.042</b>        |
|        |        | EF 5%              | 18.738       | 16.784        | 19.239        | 17.509        | 18.478        | 18.270              | 19.170        | <b>19.308</b>        |
| BRD4-1 | 5D3L   | EF 1%              | <b>2.162</b> | <b>2.162</b>  | <b>2.162</b>  | 1.730         | <b>2.162</b>  | <b>2.162</b>        | <b>2.162</b>  | <b>2.162</b>         |
|        |        | EF 5%              | 2.137        | 2.115         | 2.082         | 2.082         | <b>2.162</b>  | 2.002               | <b>2.162</b>  | <b>2.162</b>         |
|        | 5KU3   | EF 1%              | <b>2.162</b> | <b>2.162</b>  | <b>2.162</b>  | <b>2.162</b>  | <b>2.162</b>  | <b>2.162</b>        | <b>2.162</b>  | <b>2.162</b>         |
|        |        | EF 5%              | 2.082        | <b>2.162</b>  | <b>2.162</b>  | 2.002         | 2.082         | 2.082               | <b>2.162</b>  | <b>2.162</b>         |
| CREBBP | 5EIC   | EF 1%              | 2.992        | 1.000         | 12.124        | 8.771         | 9.803         | 4.901               | 6.965         | <b>12.382</b>        |
|        |        | EF 5%              | 2.454        | 1.000         | 5.695         | 4.258         | 4.874         | 4.053               | 4.412         | <b>5.900</b>         |
|        | 5MMG   | EF 1%              | 4.161        | 1.000         | 1.548         | 4.128         | 8.513         | 5.160               | 5.676         | <b>9.029</b>         |

|        |      |       |        |        |        |        |        |        |        |        |
|--------|------|-------|--------|--------|--------|--------|--------|--------|--------|--------|
|        |      | EF 5% | 2.659  | 1.000  | 2.155  | 2.976  | 4.720  | 4.002  | 3.540  | 6.054  |
| HIV IN | 4CFD | EF 1% | 2.402  | 2.402  | 2.402  | 2.402  | 2.402  | 2.402  | 2.402  | 2.402  |
|        |      | EF 5% | 2.325  | 2.247  | 2.247  | 2.092  | 2.092  | 2.247  | 2.247  | 2.325  |
|        | 4CHO | EF 1% | 2.002  | 2.402  | 2.402  | 1.602  | 1.602  | 2.002  | 2.402  | 2.402  |
|        |      | EF 5% | 2.170  | 2.092  | 2.247  | 2.015  | 2.015  | 1.627  | 2.015  | 2.247  |
| XIAP   | 1TFT | EF 1% | 38.037 | 38.184 | 43.934 | 34.498 | 42.165 | 37.152 | 42.165 | 43.344 |
|        |      | EF 5% | 17.374 | 17.079 | 19.435 | 17.727 | 18.846 | 17.845 | 19.082 | 19.553 |
|        | 5C3H | EF 1% | 40.690 | 38.332 | 43.049 | 33.909 | 42.754 | 36.857 | 43.344 | 43.934 |
|        |      | EF 5% | 17.939 | 17.842 | 19.082 | 15.901 | 19.140 | 18.080 | 19.317 | 19.435 |
| Mcl-1  | 5FC4 | EF 1% | 19.798 | 17.694 | 23.570 | 18.856 | 23.805 | 17.913 | 17.206 | 23.098 |
|        |      | EF 5% | 7.175  | 4.191  | 9.954  | 7.043  | 9.156  | 8.451  | 9.296  | 10.329 |
|        | 5MES | EF 1% | 18.856 | 15.130 | 22.627 | 16.734 | 22.155 | 18.149 | 21.920 | 23.570 |
|        |      | EF 5% | 9.045  | 3.701  | 9.531  | 7.137  | 8.639  | 8.123  | 9.296  | 9.437  |
| Mdm2   | 4ODF | EF 1% | 2.951  | 2.951  | 2.951  | 2.795  | 2.951  | 2.795  | 2.951  | 2.951  |
|        |      | EF 5% | 2.951  | 2.951  | 2.951  | 2.860  | 2.920  | 2.920  | 2.920  | 2.951  |
|        | 4ZFI | EF 1% | 2.816  | 2.795  | 2.951  | 2.640  | 2.951  | 2.951  | 2.951  | 2.795  |
|        |      | EF 5% | 2.899  | 2.885  | 2.920  | 2.800  | 2.890  | 2.890  | 2.890  | 2.890  |
| Menin  | 5DB2 | EF 1% | 1.000  | 1.000  | 6.192  | 3.810  | 6.668  | 5.716  | 3.810  | 5.716  |
|        |      | EF 5% | 1.000  | 1.000  | 3.036  | 2.751  | 2.277  | 2.941  | 2.846  | 3.131  |
|        | 6B41 | EF 1% | 3.045  | 1.000  | 3.334  | 1.905  | 6.668  | 1.905  | 2.382  | 3.334  |
|        |      | EF 5% | 2.403  | 1.000  | 2.751  | 2.751  | 3.036  | 1.138  | 2.467  | 2.561  |
